# Supplementary material for: Dynamic pattern of suicide in Australia, 1986–2005: a descriptive-analytic study
Source: PubMed Central journal article supplement — BMJ Open. 2014 Jul 29;4(7):e005311. doi: 10.1136/bmjopen-2014-005311 (PMC4120400; doi:10.1136/bmjopen-2014-005311), 2014-07-29
Supplement: bmjopen-2014-005311.draft_revisions.pdf [file bmjopen-2014-005311.draft_revisions.pdf]

# BMJ Open

## Dynamic pattern of suicide in Australia, 1986–2005

|                                 |                                                                                                                                                                                                                                                                                                                                                                                                                  |
|---------------------------------|------------------------------------------------------------------------------------------------------------------------------------------------------------------------------------------------------------------------------------------------------------------------------------------------------------------------------------------------------------------------------------------------------------------|
| Journal:                        | <i>BMJ Open</i>                                                                                                                                                                                                                                                                                                                                                                                                  |
| Manuscript ID:                  | bmjopen-2014-005311                                                                                                                                                                                                                                                                                                                                                                                              |
| Article Type:                   | Research                                                                                                                                                                                                                                                                                                                                                                                                         |
| Date Submitted by the Author:   | 21-Mar-2014                                                                                                                                                                                                                                                                                                                                                                                                      |
| Complete List of Authors:       | Qi, Xin; Xi'an Jiaotong University, School of Public Health; Queensland University of Technology, School of Public Health and Social Work<br>Hu, Wenbiao ; Queensland University of Technology, School of Public Health and Social Work<br>Page, Andrew; University of Western Sydney, School of Science and Health<br>Tong, Shilu; Queensland University of Technology, School of Public Health and Social Work |
| <b>Primary Subject Heading</b>: | Public health                                                                                                                                                                                                                                                                                                                                                                                                    |
| Secondary Subject Heading:      | Mental health, Epidemiology                                                                                                                                                                                                                                                                                                                                                                                      |
| Keywords:                       | Australia, Suicide, Pattern                                                                                                                                                                                                                                                                                                                                                                                      |
|                                 |                                                                                                                                                                                                                                                                                                                                                                                                                  |

SCHOLARONE™  
Manuscripts

# Dynamic pattern of suicide in Australia, 1986–2005

## Author details

Xin Qi<sup>1,2</sup>, Wenbiao Hu<sup>1</sup>, Andrew Page<sup>3</sup>, Shilu Tong<sup>1\*</sup>

1. Queensland University of Technology, Australia

2. Xi'an Jiaotong University, China

3. University of Western Sydney, Australia

Dr. Xin Qi, School of Public Health, Xi'an Jiaotong University, 76 Yanta Xilu, Xi'an Shaanxi 710061, China; School of Public Health and Social Work, Queensland University of Technology, Kelvin Grove, QLD, 4059, Australia

Tel: +86 188 2944 7238; Email: [chester.qi@yahoo.com](mailto:chester.qi@yahoo.com)

Dr. Wenbiao Hu, School of Public Health and Social Work, Queensland University of Technology, Kelvin Grove, QLD, 4059, Australia

Tel: +61 7 3138 5724; Email: [w2.hu@qut.edu.au](mailto:w2.hu@qut.edu.au)

Prof. Andrew Page, School of Science and Health, University of Western Sydney, Building 24, Room 4.53D, Campbelltown Campus, Locked Bag, 1797, Penrith NSW 2517, Australia

Tel: +61 2 4620 3537; Fax: +61 2 4620 3792; Email: [a.page@uws.edu.au](mailto:a.page@uws.edu.au)

Prof. Shilu Tong, School of Public Health and Social Work, Queensland University of Technology, Kelvin Grove, QLD, 4059, Australia

Tel: +61 7 3138 9745; Fax: +61 7 3138 3369; Email: [s.tong@qut.edu.au](mailto:s.tong@qut.edu.au)

Author for correspondence

Prof. Shilu Tong

## ABSTRACT

**Objective:** Patterns of suicide have been studied in many countries, but little has done in integrating different patterns of suicide over time and across local areas in Australia. This study explored the spatiotemporal variations of suicide across Australia from 1986 to 2005, discussed the reasons for dynamic changes and recommended future suicide research and prevention strategies.

**Design:** Suicide (1986–2005) and population data were obtained from the Australian Bureau of Statistics. A series of analyses were conducted to examine the suicide pattern by sex, method and age group over time and space.

**Results:** Apparent differences in suicide rates across sex, age groups and suicide methods were found across different geographical areas. Male suicides were mainly completed by hanging, firearms, gases and poison. Female suicides were primarily completed by hanging and poison. Male rate was high in rural areas while female rate was high in capital cities. Suicide rate by firearms was higher in rural areas than urban areas, while the pattern for poison was opposite. Suicide rates slightly fluctuated for total population and aged between 15 and 54, while suicide decreased among 55 years and over during the study period. There was a decrease of suicide by firearms during the study period especially after 1996 when new firearm control law was implemented; while suicide by hanging kept increasing. The change of suicide patterns by hanging and firearms was more significant in males, Northern Territory and South Australia, and some rural and remote areas in other states.

**Conclusions:** Suicide rates varied over time and space and across sexes, age groups, suicide methods. Suicide control and prevention strategies should target particular groups and areas of high and increased risk (e.g., Indigenous communities).

**Key words:** suicide, Australia, pattern

## STRENGTHS AND LIMITATIONS OF THE STUDY

This study used various cross-tabs with the 20-year Australian national suicide data cut in different ways (e.g., population group, suicide methods, time and space), and provides valuable information for examining suicide trends in Australia.

The different suicide rates across population groups and by suicide methods were presented, which may help in designing effective suicide control and prevention programs. Different levels of spatial scales (LGA and SLA) were combined to best display the spatial distribution of suicide patterns; and the boundary changes over years were also adjusted using advanced GIS methods.

This study only examined the suicide pattern at the population level using aggregated data. Detailed individual information such as marriage, employment, Indigenous status and health status before suicide was not available in the current dataset. Thus ecological fallacy is inevitable in this study and the results are difficult to be interpreted at the individual level.

The quality of suicide data may influence the results of the study. There is evidence suggesting that some suicide deaths were not covered in the current ABS database. The real suicide rate may be underestimated so the results should be interpreted with caution.

The suicide database was acquired a few years ago and may not indicate the trend of suicide after 2005.

## INTRODUCTION

Suicide has long been regarded as a major public health issues globally, with about 1 million suicide deaths annually.<sup>1</sup> Suicide patterns, including suicide methods, time and geographical variation have been explored in many countries and regions, such as China,<sup>2</sup> India,<sup>3</sup> Russia<sup>4</sup> and United States.<sup>5</sup> In Australia, suicide rates have fluctuated since the early 20<sup>th</sup> century, but

1  
2  
3 have remained below 10 per 100,000 in recent years.<sup>1 6</sup> However, there were still around  
4  
5 2,000 suicide deaths annually, mainly in young males. Thus, it is vital to understand the  
6  
7 variations of suicide patterns over time, space, population groups (age, sex and ethnic groups)  
8  
9 and the possible reasons for these variations, in order to design effective suicide control and  
10  
11 prevention programs. Previous studies have explored suicide patterns in Australia over time,<sup>6-</sup>  
12  
13 <sup>8</sup> methods<sup>9</sup> and space.<sup>10</sup> To date, however, few studies have integrated the different patterns  
14  
15 of suicide over a long term trend and across small areas in one study and compared them. The  
16  
17 spatial patterns of suicide by different population groups and suicide methods over a long  
18  
19 term have not yet been examined. The trends of suicide rates over time may differ across  
20  
21 population groups (e.g., young or older adults) and areas (e.g., suicide by firearms in urban or  
22  
23 rural areas). Thus, this study examined long-term (both dynamic and static), spatiotemporal  
24  
25 patterns of Australian national suicide, using a range of different combinations of age, time,  
26  
27 method, and location from the period 1986-2005.  
28  
29  
30

## 31 32 **DESIGN**

### 33 34 35 **Data source**

36  
37  
38 The unit record data of suicide deaths between 1986 and 2005 were acquired from Australian  
39  
40 Bureau of Statistics (ABS), including sex, International Classification of Disease (ICD) Code  
41  
42 (ICD 9: 950.0-959.9; ICD 10: X60-X84)<sup>11 12</sup> relating to suicide or self-inflicted injury, age,  
43  
44 country of birth, date of suicide and Statistical Local Area (SLA) code. The application of  
45  
46 access to suicide database in more recent years is still under review by ABS. As SLA  
47  
48 boundaries have changed dramatically over the study period, especially in urban areas, we  
49  
50 chose Local Governmental Area (LGA) as the standard geographical unit to explore the  
51  
52 spatial pattern of suicide. Each LGA is composed of one or more SLAs and the LGA  
53  
54 boundaries are relatively stable over the study period. The Australian Standard Geographical  
55  
56  
57  
58  
59  
60

1  
2  
3 Classification (ASGC), updated annually, was used to incorporate SLA codes into LGA  
4 codes, examine and adjust for SLA/LGA boundary changes over time. CDATA 2001, a  
5 product issued by ABS, provided digital boundaries and socio-demographic data of Australia  
6 (including 1991, 1996 and 2001 population census data at SLA/LGA levels, based on 2001  
7 Census boundary) and was applied in MapInfo 10.5 software package for map display.<sup>13</sup>  
8  
9 Population data (SLA/LGA levels) in 1986 and 2006 Census from ABS were merged with  
10 2001 Census data after adjustment for boundary changes using ASGC references. The suicide  
11 rates in different groups over time and across LGAs were then calculated. In this study, we  
12 categorize LGAs as three types: metropolitan areas of capital cities, regional centres (other  
13 LGA named as “city” outside of capital cities, e.g., City of Townville), rural and remote areas  
14 (the remaining LGAs).  
15  
16  
17  
18  
19  
20  
21  
22  
23  
24  
25  
26  
27

28 Most areas in South Australia (SA) and Northern Territory (NT) have a very low population  
29 density and were defined as unincorporated areas by ABS at the LGA level, but these areas  
30 were also composed of 27 SLAs according to the 2001 Census data. Thus we applied SLA  
31 data in unincorporated areas in SA and NT to provide more detailed information. In the 2001  
32 Census, Australia was divided into 628 LGAs, plus 27 SLAs in the unincorporated areas of  
33 SA and NT. Ethical approval was granted by the Human Research Ethics Committee,  
34 Queensland University of Technology.  
35  
36  
37  
38  
39  
40  
41  
42  
43

#### 44 **Statistical analyses**

45  
46  
47 Descriptive and mapping approaches were applied to explore the age, sex, method, time and  
48 regional-specific patterns of suicide cases and rates. Firstly, we explored the basic pattern of  
49 suicide among different groups by calculating suicide rates, relative risk (RR) and 95%  
50 Confident Interval (CI) to annual mean of national suicide rate over the study period. Then the  
51 temporal trends of suicide rates in population groups were examined, using yearly data and  
52  
53  
54  
55  
56  
57  
58  
59  
60

1  
2  
3  
4  
5  
6  
7  
8  
9  
10  
11  
12  
13  
14  
15  
16  
17  
18  
19  
20  
21  
22  
23  
24  
25  
26  
27  
28  
29  
30  
31  
32  
33  
34  
35  
36  
37  
38  
39  
40  
41  
42  
43  
44  
45  
46  
47  
48  
49  
50  
51  
52  
53  
54  
55  
56  
57  
58  
59  
60

Poisson regression. All the statistical analyses were implemented by SPSS 21.0.<sup>14</sup> Finally suicide rates at the LGA level were applied to display suicide rates over sexes, age groups and suicide methods using mapping approaches by MapInfo 10.5.<sup>13</sup> We used the annual average sex-specific rates for the whole of Australia over the entire study period as the reference to calculate age-adjusted standardised mortality ratio (SMR) of both sexes which were mapped.

## RESULTS

This study included 45,293 suicide deaths in 20 years and only 187 suicides aged below 15, about 0.4% of total suicides. Thus we did not specifically analyse the pattern of suicide below 15 years; however, we still keep them in results of all-age groups. Table 1 indicates that most of suicides occurred in those aged between 15 and 54 and occurred in capital cities and regional centres, as the majority of Australian population live in urban areas. However, suicide rate in rural and remote areas was higher than that in urban areas. Around 80% of suicides were males and most suicides aged between 15 and 54 years, while older males (75-year and over) had higher suicide rate than males in other age groups. Most suicides were in four methods: (1) firearms, air guns and other explosive (simplified as firearms); (2) hanging; (3) gases and vapours; (4) solid or liquid substances. The relative risk (RR) and 95% Confident Interval (CI) of suicide in each population group and by different methods were calculated, using annual average suicide incidence in the study period in Australia as a reference (Table 1). We also applied Chi square test to check the suicide cases distribution by population groups and methods, and all the results are significant.

Table 1 about here

Figure 1 shows the time-series trends of suicide by different groups. There was a peak of suicide rate among the total population from 1996 to 1998, particularly in males aged between 15 and 34 years (A), males in rural and remote areas (B) and suicide completed by hanging

1  
2  
3 (C). In the early years of the study period, suicide incidence among 55 years and over was  
4  
5 higher than those below 55 years, however, it was observed to drop lower than that of young  
6  
7 and middle aged adults in recent years (A). The trends of suicide among 15 to 54 years had  
8  
9 slight fluctuations during the study period among different sub-groups (A). We also found  
10  
11 decreased suicide by firearms over the study period; while suicide by hanging sharply rose  
12  
13 among males (C). Figure 2 used 5-year periods to explore suicide of specific methods by age  
14  
15 groups and urban rural differences for a better visual effect. Suicide rates by firearms  
16  
17 decreased over the study period, especially in rural and remote areas (Figure 2B); while  
18  
19 suicide by hanging increased dramatically, reaching a peak in between 1996 and 2000,  
20  
21 especially in males (Figure 2A and 2B). Suicide rates by hanging in males dropped after 1997  
22  
23 but were still higher than the early years of the study period. Suicide rates by gases and  
24  
25 vapours, solid and liquid substances slightly fluctuated in the study period among all  
26  
27 population groups (Figure 2A and 2B). More details of suicide incidence trend over time in  
28  
29 each population group and suicide methods were indicated in Appendixes 1 and 2. Poisson  
30  
31 regression was implemented to examine the time series trend of suicide rates across  
32  
33 population groups and by methods (Table 2). Suicide rates by sexes, 55 years and over, in  
34  
35 urban areas, and completed by firearms, solid and liquid substances had significantly  
36  
37 decreased over time. However, suicide rates by hanging significantly increased in the study  
38  
39 period.  
40  
41  
42  
43  
44

45  
46 Figure 1 about here

47  
48 Figure 2 about here

49  
50 Table 2 about here

51  
52  
53  
54  
55 Figure 3 indicates that among 15 to 34 years, north and central south of Northern Territory  
56  
57 (NT), northeast and some southern parts of Western Australia (WA), northwest and central  
58  
59  
60



1  
2  
3 inland areas of Queensland (QLD) and some inland areas of New South Wales (NSW) had  
4  
5 higher suicide mortalities (2A). The patterns were also similar for males (NT, QLD and WA  
6  
7 in B1). Population aged between 35 and 74 had fewer high-risk areas than that aged 15 to 34  
8  
9 (A2 and A3). For those aged 75 and over, mortalities in north and inland of QLD and a few  
10  
11 LGAs in NSW and WA was higher than other areas; around 40% of total LGAs and  
12  
13 unincorporated SLAs in NT and SA had no suicide occurred. Compared with males, more  
14  
15 areas, e.g., northeast NT, most of rural/remote areas in WA and inland QLD, had no female  
16  
17 suicide (2B). Rural and remote areas had lower rates by self-poison than urban areas, except  
18  
19 for some LGAs in inland QLD, east SA and south WA (2C).  
20  
21  
22  
23

24 Figure 3 about here

25  
26 As suicide rates by firearms and by hanging had more significant changes over time than  
27  
28 other methods and by population groups, we also explored whether this trend existed in  
29  
30 spatial scales over time by cutting the whole study period into four 5-year periods (Figure 4).  
31  
32 Figure 4A indicates that suicide rate by hanging was low in the early years of study period  
33  
34 (A1), and very few suicides occurred in rural and remote areas in WA, NT, QLD and NSW.  
35  
36 However, suicide by hanging kept increasing. North of WA, NT and SA, north of QLD and  
37  
38 even urban LGAs had much higher suicide rates between 1996 and 2005 compared with that  
39  
40 in earlier years. However, the trend of suicide by firearms was opposite to that of suicide by  
41  
42 hanging (Figure 4B), especially in SA and NT, north and inland areas in NSW and QLD, and  
43  
44 middle of WA (B1 and B2). In general, unincorporated NT and SA had much more suicide  
45  
46 cases reported after 1996 (123 from 1996 to 2005) compared with the period before 1996 (22  
47  
48 from 1986-1995).  
49  
50  
51  
52

53 Figure 4 about here

## 54 55 56 57 **DISCUSSION**

1  
2  
3 This study explored suicide patterns in a range of different combinations of age, time,  
4 method, and location in Australia, using both dynamic (trends over time) and static (averages  
5 over the entire study period) approaches. Males accounted for most suicides. Suicide rate was  
6 relatively higher among youths, young and middle-aged adults, in rural and remote areas, and  
7 by hanging and by firearms. However, suicide rate among 55 years and over was higher than  
8 population aged below 55 in the early years of the study period and then decreased  
9 significantly, especially for older males. Suicide by firearms decreased during the study  
10 period, while suicide by hanging kept increasing, especially in males and rural/remote areas.  
11 The spatial and spatiotemporal patterns of suicide were consistent with yearly mean and  
12 temporal trends of suicide among different groups.  
13  
14  
15  
16  
17  
18  
19  
20  
21  
22  
23  
24

25 Suicidal behaviours among elderly and upper middle-aged adults (55-years and over) may be  
26 triggered from loneliness and other health issues (e.g., chronic diseases), which may lead to  
27 psychiatric symptoms, e.g., anxiety, sense of hopelessness.<sup>15 16</sup> Usually older adults are less  
28 likely to seek for psychiatric support when they have relevant symptoms, especially in earlier  
29 years (e.g., before the middle of 1990s).<sup>17</sup> Thus they had higher annual average suicide rate  
30 than younger age groups in general, especially among males. However, suicide rate among  
31 this age group gradually decreased in the study period, especially after 2000, with an  
32 increased use of antidepressants among older adults.<sup>18</sup> Evidence also indicates that  
33 antidepressants can reduce psychological disorders, e.g., depression, and suicidal behaviours  
34 among the elderly, especially when combined with other interventions (e.g., counselling and  
35 family support).<sup>19</sup> Selective serotonin reuptake inhibitors have less side effects (e.g.,  
36 cardiovascular impairs and drug interactions) than other drugs, and have been widely  
37 recommended to older adults from clinics.<sup>20 21</sup> However, little evidence has indicated that  
38 antidepressant use has significant effectiveness on youth suicide.<sup>20 21</sup> Studies in other  
39 countries have also provided evidence about the protective effect of antidepressants on severe  
40  
41  
42  
43  
44  
45  
46  
47  
48  
49  
50  
51  
52  
53  
54  
55  
56  
57  
58  
59  
60

1  
2  
3 depression and suicide behaviours, although treatment of other levels of depression are still  
4 not clear.<sup>22 23</sup>  
5  
6

7  
8 In 1986, firearms and other explosives were the most common methods of suicide in  
9 Australia, over 6 per 100,000 among males. However, the rate dropped to around 2 per  
10 100,000 in 2005. By contrast, male suicide rate by hanging rose from 3.8 per 100,000 in 1986  
11 to 9.4 per 100,000 in 2005, after experiencing a peak of 10.6 per 100,000 in 1998. A study in  
12 Victoria indicated that a decreased registration of firearms and lower and suicide rates were  
13 significantly correlated from 1997 to 2000 [24]. In this study, there were more decreased male  
14 suicide rate by firearms from period 1991-1995 to period 1996-2000 than other adjacent  
15 period (from period 1980-1990 to period 1991-1995, and from period 1996-2000 to period  
16 2001-2005) as Table 3 indicated. Thus it is suggestive that firearm law enforcement enacted  
17 in 1996 after the massacre in Tasmania, may have led to significant lower suicide rate by  
18 firearms over an extended period at the national level.<sup>24</sup> However, other studies indicated that  
19 decreased firearm suicide rate in young adults was accompanied with rising suicide rates by  
20 other methods at the national and local level.<sup>25 26</sup> Other countries also experienced decreased  
21 suicide rate by firearms and increased suicide rate by hanging over time.<sup>27 28</sup> This may due to  
22 increased substitute methods (e.g., hanging) for firearms.<sup>29</sup> Firearms usage has still been the  
23 most common method of suicide in the United States in recent years, even after a decrease in  
24 the previous decades.<sup>27</sup> Compared with United States, the pattern of suicide methods has  
25 changed more dramatically in Australia over time, due to stricter firearm control measures in  
26 Australia nationally than that in the US.<sup>26 27</sup> However, suicide rate by firearms in rural areas  
27 was higher than that in urban areas, owing much to the availability of firearms. More  
28 evidence, including the interaction between socio-economic changes and suicide methods,  
29 still needs to be assessed, especially for recent years.  
30  
31  
32  
33  
34  
35  
36  
37  
38  
39  
40  
41  
42  
43  
44  
45  
46  
47  
48  
49  
50  
51  
52  
53  
54  
55

56  
57 Table 3 about here  
58  
59  
60

1  
2  
3 Only a small percentage of population and suicides were for those aged 75 and over, thus  
4 many LGAs had no suicides or higher suicide rate among older adults, especially in rural and  
5 remote areas. Usually areas with high risk of suicide have lower socio-economic status, along  
6 with higher proportion of Indigenous population.<sup>10</sup> Our previous study indicated that  
7 Mornington Shire in QLD and Bathurst-Melville in north of NT had much higher suicide risk,  
8 proportion of Indigenous population and lower socio-economic status than the national  
9 average, and both were indicated as high risk clusters using spatial cluster analysis (1999-  
10 2003).<sup>10</sup> In this study, both of them experienced increased number of suicide cases between  
11 1996 and 2005 (27 in Mornington, 23 males and 26 by hanging; 23 in Bathurst-Melville, 22  
12 males and 20 by hanging), compared to that between 1986 and 1995 (4 in Mornington, male  
13 and 3 by hanging; 3 in Bathurst-Melville, male and by hanging). Population in Mornington  
14 Shire fluctuated from 718 (lowest, 1991 Census) to 1,111 (highest, 1996 Census) from 1986  
15 to 2005; and population in Bathurst-Melville increased from 1,811 (1986 Census) to 2,512  
16 (2006 Census). As a substitute, suicide by hanging has increased in Indigenous communities,  
17 as similar as other areas and population groups.<sup>28</sup> Alcohol has been introduced to the  
18 Aboriginal communities in Indigenous communities (e.g., Top North of NT and SA), and  
19 local people tended to be mentally and psychologically jeopardised by domestic violence and  
20 social disruptions related to alcohol use even from early years,<sup>30 31</sup> especially among youth  
21 and young adults.<sup>32</sup> Thus suicide behaviours were triggered from mental health problems after  
22 years of indirect influence from alcohol and can be spread quickly within an isolated  
23 community with limited population.<sup>33 34</sup> Family conflicts and social disruption have been  
24 reported contribution to the high suicide incidence in Indigenous population, e.g., lost of  
25 relatives in early lives due to a shorter life expectancy compared with non-Indigenous  
26 population, self-destructive and anti-social behaviours, unsolved anger and other life events.<sup>35</sup>  
27 Hanging acted as a substitute to other methods like firearms and poison, which may indicate  
28 that most Indigenous suicides were completed by hanging, especially after 1995.<sup>36</sup> Although  
29  
30  
31  
32  
33  
34  
35  
36  
37  
38  
39  
40  
41  
42  
43  
44  
45  
46  
47  
48  
49  
50  
51  
52  
53  
54  
55  
56  
57  
58  
59  
60

1  
2  
3 Indigenous status of suicide was not available in this study, yet the results were consistent  
4  
5 with previous studies. This mechanism may also explain the increased suicide cases in  
6  
7 unincorporated areas in NT (including Bathurst-Melville) and SA in general over the study  
8  
9 period.  
10

11  
12 The differences of suicide reporting systems may also influence the results. For example,  
13  
14 Williams et al reported that suicide rate in Queensland from the Queensland Suicide Register  
15  
16 (QSR) was higher than that from the Australian Bureau of Statistics (ABS), reasoning that the  
17  
18 disparity was due to such factors as information management and definition of suicidal  
19  
20 behaviours.<sup>37</sup> Compared with QSR, there were some underreported suicides not recorded in  
21  
22 the ABS database, especially in recent years. Thus the suicide rate in Queensland was lower  
23  
24 when using ABS data. However, ABS had a higher standard for evaluating the causes of  
25  
26 deaths, e.g., complete documents from hospital or police.<sup>38</sup> Some deaths were re-examined for  
27  
28 their reasons and confirmed as suicides after a few years of the date of the deaths. So the  
29  
30 information of current suicide deaths in the ABS database is accurate but some other suicides  
31  
32 may not have been recorded, especially in the database of recent years.  
33  
34  
35  
36

37  
38 Recommendations on future research and public interventions can be proposed based on the  
39  
40 results of this study. Firstly, more details (e.g., health and financial status, alcohol and drugs  
41  
42 use, and family conflicts history) of suicide victims need to be acquired to help public health  
43  
44 policy makers and health workers to design and implement suicide control and prevention  
45  
46 strategies targeting particular population groups (e.g., male young adults) and areas (e.g.,  
47  
48 Indigenous communities). Suicide by firearms is still significant especially in rural and  
49  
50 remote areas. Thus effectiveness of control and prevention strategies e.g., firearm and  
51  
52 pesticide restrictions,<sup>39 40</sup> need to be evaluated. Gatekeeper education and training on rural  
53  
54 general practitioners are necessary in increasing their capacity of identifying local vulnerable  
55  
56 population (e.g., farmers and Indigenous population) and suicidal behaviours to reduce  
57  
58  
59  
60

1  
2  
3 potential suicide risk. Education of primary health workers and the general population are  
4  
5 vital in reducing suicidal behaviours,<sup>41-44</sup> and effectiveness of health education programs  
6  
7 needs to be assessed locally. The effectiveness of antidepressant use still need to explored and  
8  
9 improved, especially in youths and young adults.<sup>20</sup> These activities should be explored at a  
10  
11 local level, especially in high risk areas and population groups, to assess and improve the  
12  
13 effectiveness of suicide prevention programs. Potential impacts of socioeconomic<sup>45 46</sup> and  
14  
15 environmental factors<sup>47-49</sup> on suicide over time and space should also be addressed. As suicide  
16  
17 is a complex issue, cross-sectional and multi-disciplinary approaches need to be implemented  
18  
19 in suicide control and prevention in different levels (e.g., national, state and local). In  
20  
21 conclusion, this study has explored patterns of suicide across population groups and by  
22  
23 suicide methods over time and space. These results may have significant implication for  
24  
25 developing national suicide prevention strategies through focusing on high risk population  
26  
27 groups, local areas and specific suicide methods.  
28  
29  
30

### 31 32 Competing interests

33  
34  
35 We declare that we have no competing interests.  
36  
37

### 38 39 Authors' contributions

40  
41 Xin Qi designed the study, implemented all statistical analyses and drafted the manuscript.  
42  
43 Shilu Tong conceptualised the idea and revised the study protocol, especially the research  
44  
45 design and data analysis. Wenbiao Hu provided advice on statistical analyses and  
46  
47 interpretation of the results. Andrew Page helped interpreting the results and drafting the  
48  
49 manuscript. All the authors contributed to the preparation of the final manuscript and  
50  
51 approved the submission.  
52  
53  
54

55  
56 Xin Qi was funded by the QUT Postgraduate Research Award Scholarship, and Shilu Tong  
57  
58 was supported by a NHMRC Research Fellowship (#553043). We also thank Prof. Richard  
59  
60

1  
2 from University of New South Wales for providing the suicide data, Dr. Lyle Turner from  
3  
4 Monash University for his comments on the manuscript.  
5  
6  
7  
8  
9

## 10 Reference

- 11 1. World Health Organization (2012) Suicide prevention (SUPRE). Available:  
12 [http://www.who.int/mental\\_health/prevention/suicide/suicideprevent/en/index.html](http://www.who.int/mental_health/prevention/suicide/suicideprevent/en/index.html) (Assessed  
13 08 September 2012)  
14  
15
- 16 2. Phillips MR, Li X, Zhang Y. Suicide rates in China, 1995-99. *Lancet* 2002;359:835–840.  
17  
18
- 19 3. Patel V, Ramasundarahettige C, Vijayakumar L, *et al.* Suicide mortality in India: a  
20 nationally representative survey. *Lancet* 2012;379:2343–2351.  
21  
22
- 23 4 Pridemore WA, Spivak AL. Patterns of suicide mortality in Russia. *Suicide Life Threat*  
24 *Behav* 2003;33:132–150.  
25  
26
- 27 5 Miller M, Azrael D, Barber C. Suicide mortality in the United States: the importance of  
28 attending to method in understanding population-level disparities in the burden of suicide.  
29 *Annu Rev Public Health* 2012;33:393–408.  
30  
31
- 32 6 ABS. 3309.0 *Suicides, Australia, 1921 to 1998*. Australian Bureau of Statistics, Canberra,  
33 Australia, 2000.  
34  
35
- 36 7 ABS. 3309.0. *Suicides, Australia, 2005*. Australian Bureau of Statistics, Canberra,  
37 Australia, 2007.  
38  
39
- 40 8 Spittal MJ, Pirkis J, Miller M, *et al.* Declines in the lethality of suicide attempts explain the  
41 decline in suicide deaths in Australia. *PLOS One* 2012;7:e44565.  
42  
43
- 44 9. Large MM, Nielssen OB. Suicide in Australia: meta-analysis of rates and methods of  
45 suicide between 1988 and 2007. *Med J Aust* 2010;192:432–437.  
46  
47
- 48 10. Qi X, Hu W, Page A, Tong S. Spatial clusters of suicide in Australia. *BMC Psychiatry*  
49 2012;12:86.  
50  
51
- 52 11 WHO. *International Classification of Diseases, 9th revision (ICD-9)*. Geneva: World  
53 Health Organization, 1975.  
54  
55  
56  
57  
58  
59  
60

- 1  
2  
3 12 WHO. *The ICD-10 classification of mental and behavioral disorders*. Geneva: World  
4 Health Organization, 1992.  
5  
6 13 MapInfo Corporation. *MapInfo Professional 10.5 User Guide*. MapInfo Corporation, New  
7 York, United States of America, 2010.  
8  
9  
10 14 Arbuckle JL. *IBM SPSS Amos 21 User's Guide*. IBM Corporation North Castle Drive  
11 Armonk, NY 10504-1785 United States of America, 2012.  
12  
13  
14 15 Loboprabhu S, Molinari V. Severe loneliness in community-dwelling aging adults with  
15 mental illness. *J Psychiatr Pract* 2012;18:20–28.  
16  
17  
18 16 Bekhet AK, Zauszniewski JA. Mental health of elders in retirement communities: is  
19 loneliness a key factor? *Arch Psychiatr Nurs* 2012;26:214–224.  
20  
21  
22 17 Pearson JL, Conwell Y, Lindsay J, *et al*. Elderly suicide: A multi-national view. *Aging*  
23 *Ment Health* 1997;1:107-111.  
24  
25  
26 18 Hall WD, Mant A, Mitchell PB, *et al*. Association between antidepressant prescribing and  
27 suicide in Australia, 1991–2000: trend analysis. *BMJ* 2003;326:1008.  
28  
29  
30 19 Hickie IB, Davenport TA, Naismith SL, *et al*. Treatment of common mental disorders in  
31 Australian general practice. *Med J Aust* 2001;175 Suppl:S25–30.  
32  
33  
34 20 Mackay FR, Dunn NR, Martin RM, *et al*. Newer antidepressants: a comparison of  
35 tolerability in general practice. *Br J Gen Pract* 1999;49:892–896.  
36  
37  
38 21 Preskorn SH. Antidepressant drug selection: criteria and options. *J Clin Psychiatry*  
39 1994;55 Suppl A:6–22.  
40  
41  
42 22 Mojtabai R. The public health impact of antidepressants: an instrumental variable analysis.  
43 *J Affect Disord* 2011;134:188–197.  
44  
45  
46 23 Friedman RA, Leon AC. Expanding the black box - depression, antidepressants, and the  
47 risk of suicide. *N Engl J Med* 2007;356:2343–2346.  
48  
49  
50 24 Ozanne-Smith J, Ashby K, Newstead S, *et al*. Firearm related deaths: the impact of  
51 regulatory reform. *Inj Prev* 2004;10:280–286.  
52  
53  
54  
55  
56  
57  
58  
59  
60



- 1  
2  
3 25 Klieve H, Barnes M, De Leo D. Controlling firearms use in Australia: has the 1996 gun  
4 law reform produced the decrease in rates of suicide with this method? *Soc Psychiatry*  
5 *Psychiatr Epidemiol* 2009;44:285–292.  
6  
7  
8  
9 26 McPhedran S, Baker J. Suicide prevention and method restriction: evaluating the impact of  
10 limiting access to lethal means among young Australians. *Arch Suicide Res* 2012;16:135–146.  
11  
12  
13 27 Cent.Dis. Control Prev. Compressed mortality file (underlying cause-of-death). Wide-  
14 Ranging Online Data for Epidemiologic Research (WONDER) database, 2010. Available:  
15 <http://wonder.cdc.gov/mortSQL.html> (Assessed 08 September 2012).  
16  
17  
18  
19 28 Stark C, Hopkins P, Gibbs D, *et al.* Trends in suicide in Scotland 1981-1999: age, method  
20 and geography. *BMC Public Health* 2004;4:49.  
21  
22  
23 29 Wilkinson D, Gunnell D. Comparison of trends in method-specific suicide rates in  
24 Australia and England & Wales, 1968-97. *Aust N Z J Public Health* 2000;24:153–157.  
25  
26  
27 30 Hunter E, Reser J, Baird M, *et al.* *An analysis of suicide in Indigenous communities in*  
28 *North Queensland. The historical cultural and symbolic landscape.* Commonwealth  
29 Department of Health and Aged Care, Australia, 1999.  
30  
31  
32  
33 31 Austin AE, van den Heuvel C, Byard RW. Causes of community suicides among  
34 indigenous South Australians. *J Forensic Leg Med* 2011;18:299–301.  
35  
36  
37 32 Tse R, Sims N, Byard RW. Alcohol ingestion and age of death in hanging suicides. *J*  
38 *Forensic Sci* 2011;56:922–924.  
39  
40  
41 33 Cantor CH, Baume P. Access to methods of suicide. What impact? *Aust N Z J Psychiatry*  
42 1998;32:8–14.  
43  
44  
45 34 Beautrais A. Risk factors for suicide and attempted suicide among young people. *Aust N Z*  
46 *J Psychiatry* 2000;34:420–436.  
47  
48  
49 35 De Leo D, Svetcic J, Milner A, *et al.* *Suicide in Indigenous populations of Queensland.*  
50 Australian Academic Press, Bowen Hills, Queensland, Australia, 2011.  
51  
52  
53  
54 36 Parker R, Ben-Tovim DI. A study of factors affecting suicide in Aboriginal and 'other'  
55 populations in the Top End of the Northern Territory through an audit of coronial records.  
56 *Aust N Z J Psychiatry* 2002;36:404–410.  
57  
58  
59  
60

- 1  
2  
3 37 Williams R, Doessel D, Svetcic J, *et al*. Accuracy of official suicide mortality data in  
4 Queensland. *Aust N Z J Psychiatry* 2010;44:815–822.  
5  
6  
7 38 ABS. 3303.0. *Causes of death, Australia, 2007*. Australian Bureau of Statistics, Canberra,  
8 Australia, 2009.  
9  
10  
11 39 Lester D, Leenaars A. Suicide rates in Canada before and after tightening firearm control  
12 laws. *Psychol Rep* 1993;72:787–790.  
13  
14  
15 40 Ludwig J, Cook PJ. Homicide and suicide rates associated with implementation of the  
16 Brady Handgun Violence Prevention Act. *JAMA* 2000;284:585–591.  
17  
18  
19 41. Rihmer Z, Belso N, Kalmar S. Antidepressants and suicide prevention in Hungary. *Acta*  
20 *Psychiatr Scand* 2001;103:238–239.  
21  
22  
23 42 Jorm AF, Christensen H, Griffiths KM. The impact of beyond blue: the national  
24 depression initiative on the Australian public’s recognition of depression and beliefs about  
25 treatments. *Aust N Z J Psychiatry* 2005;39:248–254.  
26  
27  
28 43 Paykel ES, Hart D, Priest RG. Changes in public attitudes to depression during the Defeat  
29 Depression Campaign. *Br J Psychiatry* 1998;173:519–522.  
30  
31  
32 44 Mann JJ, Apter A, Bertolote J, *et al*. Suicide prevention strategies: a systematic review.  
33 *JAMA* 2005;294:2064–2074.  
34  
35  
36 45 Huisman M, Oldehinkel AJ. Income inequality, social capital and self-inflicted injury and  
37 violence-related mortality. *J Epidemiol Community Health* 2009;63:31–37.  
38  
39  
40 46 Chan WS, Yip PS, Wong PW, *et al*. Suicide and unemployment: what are the missing  
41 links? *Arch Suicide Res* 2007;11:327–335.  
42  
43  
44 47 Lambert G, Reid C, Kaye D, *et al*. Increased suicide rate in the middle-aged and its  
45 association with hours of sunlight. *Am J Psychiatry* 2003;160:793–795.  
46  
47  
48 48 Nicholls N, Butler CD, Hanigan I. Inter-annual rainfall variations and suicide in New  
49 South Wales, Australia, 1964–2001. *Int J Biometeorol* 2006;50:139–143.  
50  
51  
52 49 Fragar LJ, Gray EJ, Franklin RJ, *et al*. *A picture of health: a preliminary report of the*  
53 *health of country Australians*. The Australian Agricultural Health Unit, P.O. Box 256, Moree,  
54 NSW 2400, Australia, 1997.  
55  
56  
57  
58  
59  
60

1  
2  
3  
4  
5  
6  
7  
8  
9  
10 Figure 1: suicide rates over time and sub-groups (per 100,000)

11 A: Sex and age groups; B: Sex and urban rural differences; C: Sex and methods;  
12  
13  
14  
15  
16  
17  
18  
19  
20  
21  
22  
23  
24  
25  
26  
27  
28  
29  
30  
31  
32  
33  
34  
35  
36  
37  
38  
39  
40  
41  
42  
43  
44  
45  
46  
47  
48  
49  
50  
51  
52  
53  
54  
55  
56  
57  
58  
59  
60

For peer review only

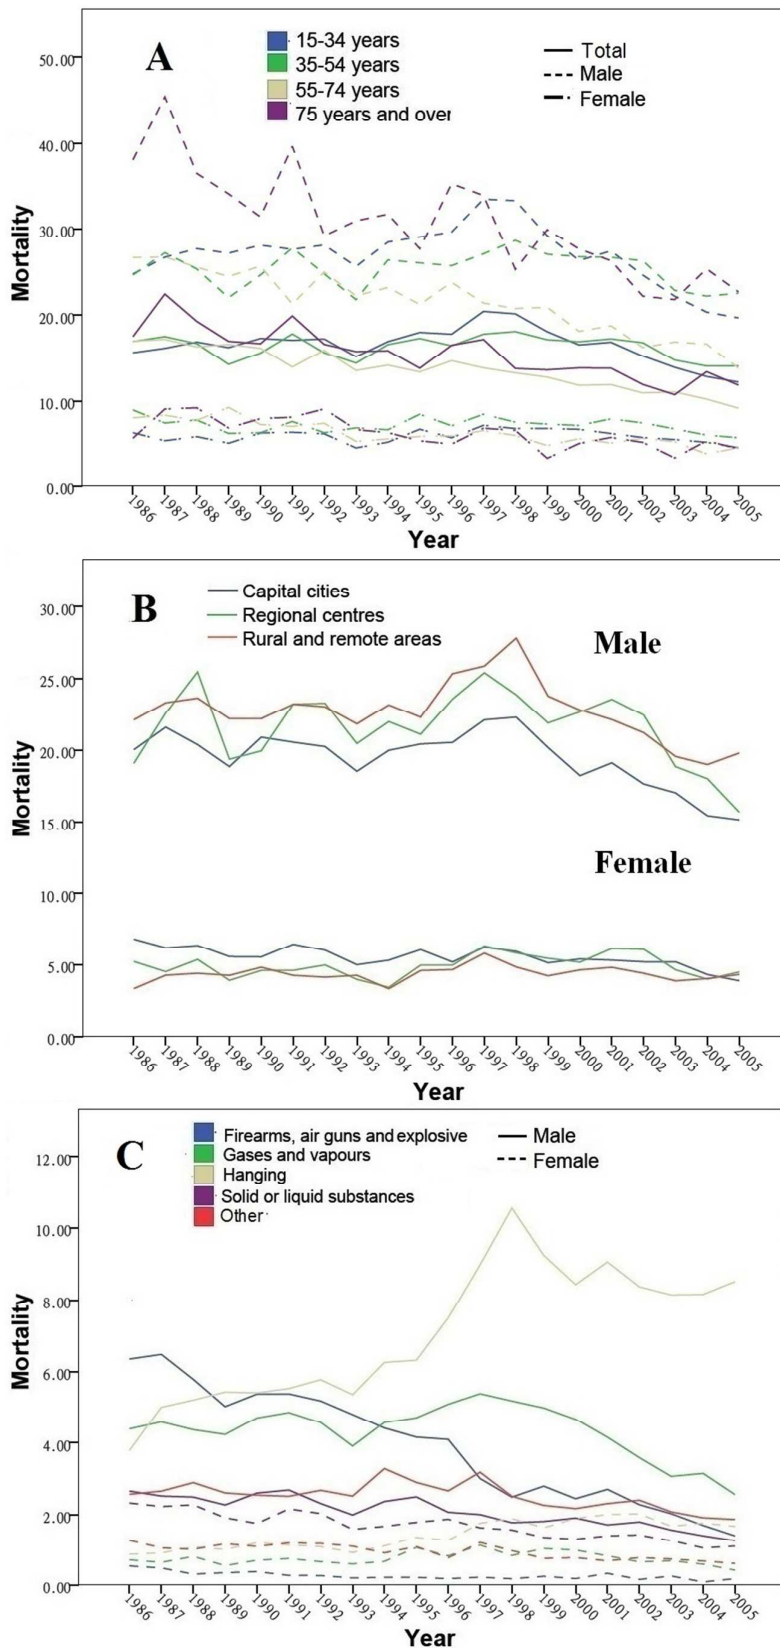

Figure 2: suicide rates over time and methods (per 100,000, annual average)

A: Methods and age groups: B: Methods and urban rural difference

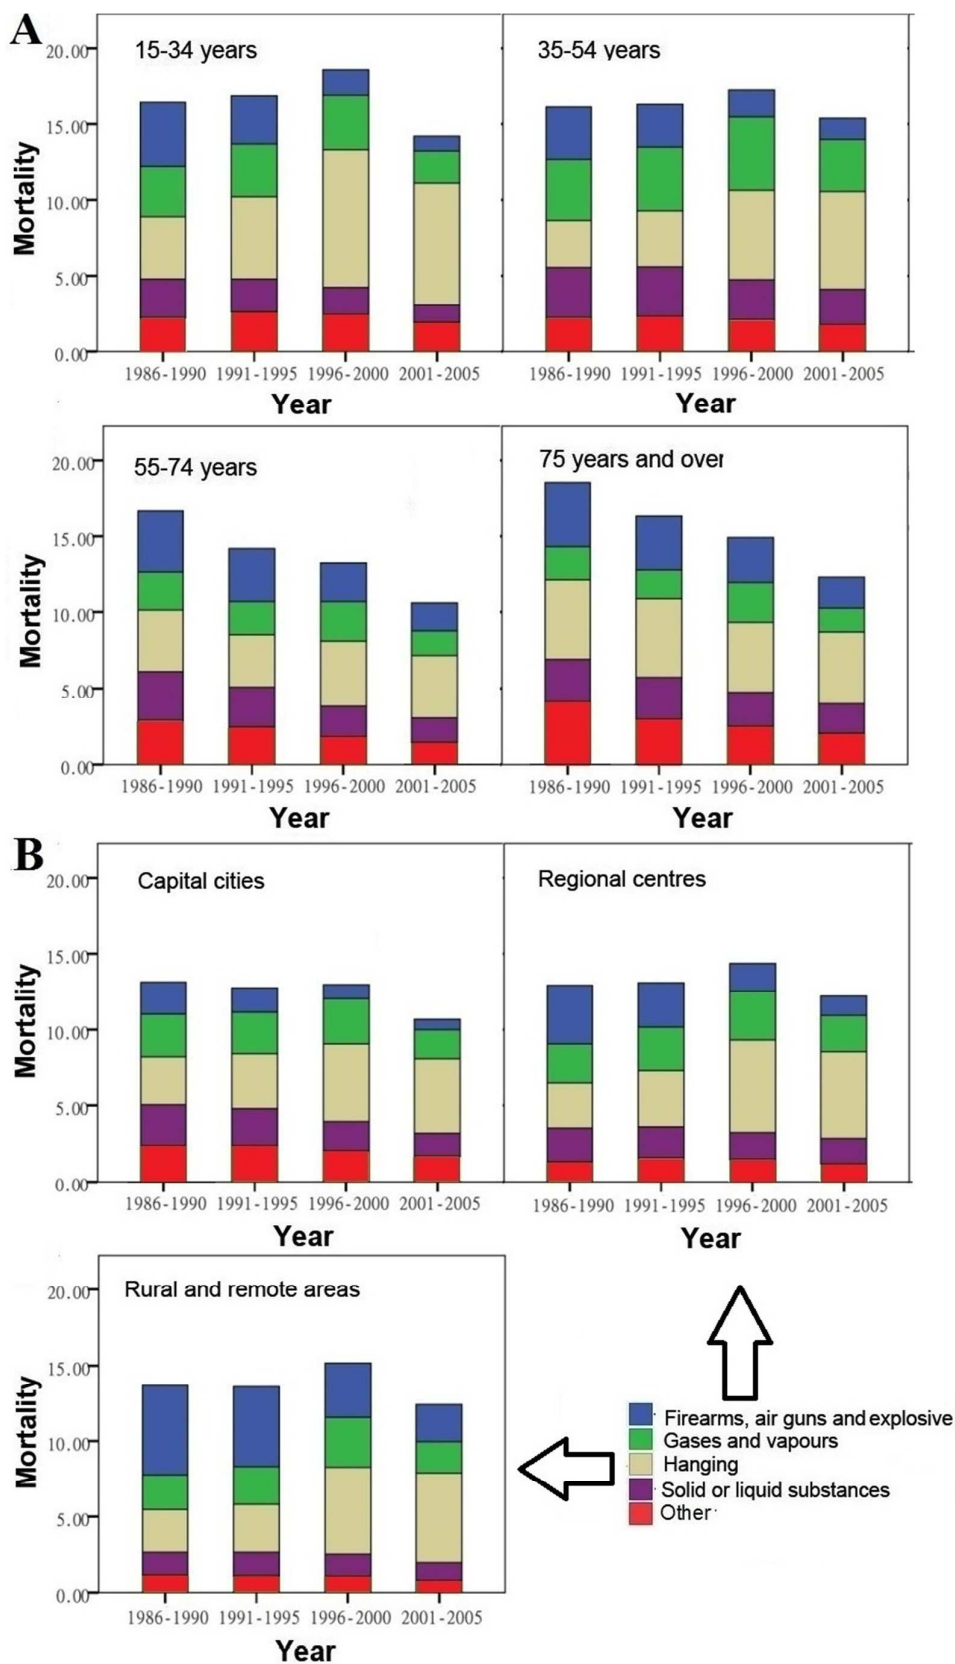

Figure 3: Suicide rates among different groups across Australia (1986-2005)

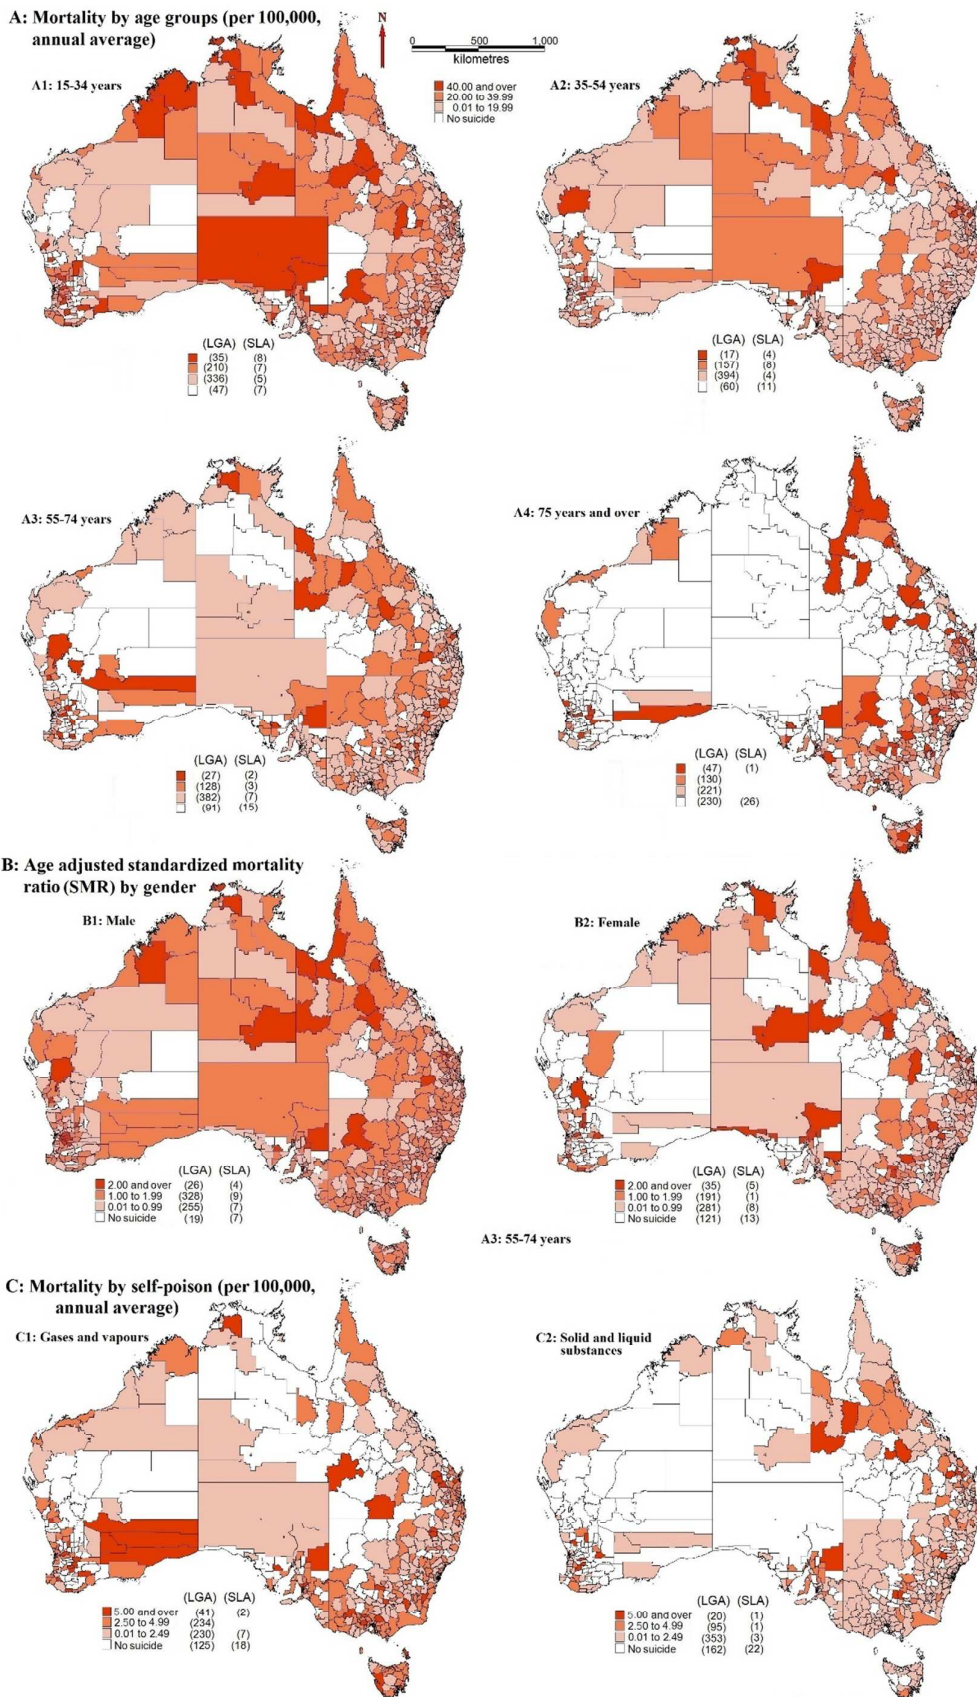

Figure 4: Suicide rates by self-harm over time and across space in Australia (1986-2005)

**A: Mortality by hanging (per 100,000, annual average)**

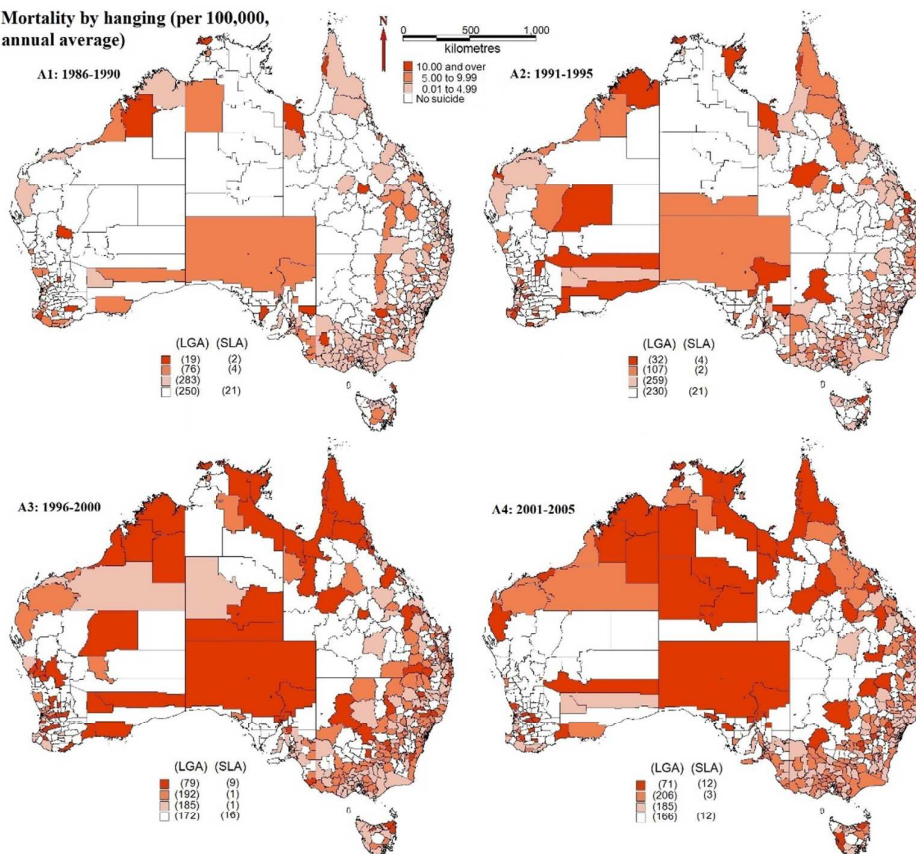

**B: Mortality by firearms, air guns and explosive (per 100,000, annual average)**

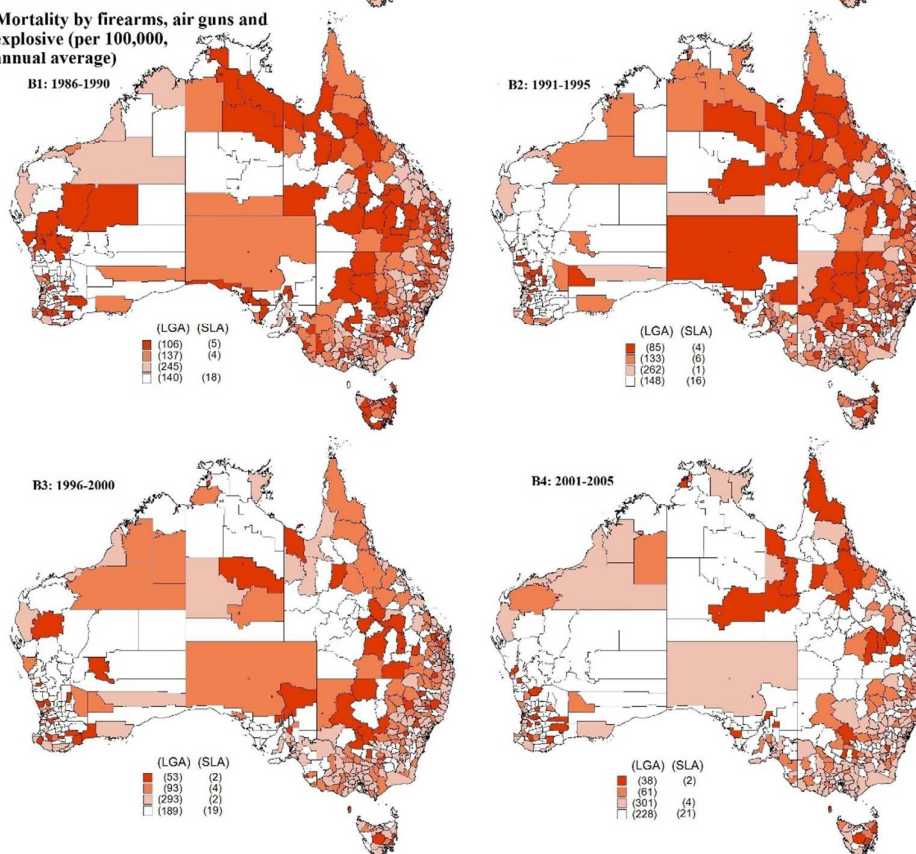

1  
2  
3  
4  
5  
6  
7  
8  
9  
10  
11  
12  
13  
14  
15  
16  
17  
18  
19  
20  
21  
22  
23  
24  
25  
26  
27  
28  
29  
30  
31  
32  
33  
34  
35  
36  
37  
38  
39  
40  
41  
42  
43  
44  
45  
46  
47  
48  
49  
50  
51  
52  
53  
54  
55  
56  
57  
58  
59  
60

Table 1: Suicide deaths and rate (per 100,000) across different groups in Australia (1986-2005)

| Population group                | Age group |       |                   | 35 to 54 |       |                   | 55 to 74 |       |                   | 75 & over |       |                   | All ages |       |                   |
|---------------------------------|-----------|-------|-------------------|----------|-------|-------------------|----------|-------|-------------------|-----------|-------|-------------------|----------|-------|-------------------|
|                                 | Cases     | Rate  | RR (95% CI)       | Cases    | Rate  | RR (95% CI)       | Cases    | Rate  | RR (95% CI)       | Cases     | Rate  | RR (95% CI)       | Cases    | Rate  | RR (95% CI)       |
| <b>By sex</b>                   |           |       |                   |          |       |                   |          |       |                   |           |       |                   |          |       |                   |
| Male                            | 15,059    | 28.29 | 2.23 (2.19, 2.27) | 12,672   | 25.61 | 2.02 (1.98, 2.06) | 5,986    | 22.35 | 1.77 (1.72, 1.81) | 2,091     | 30.98 | 2.45 (2.34, 2.56) | 35,942   | 20.32 | 1.61 (1.58, 1.63) |
| Female                          | 3,242     | 6.12  | 0.48 (0.47, 0.50) | 3,556    | 7.14  | 0.56 (0.55, 0.58) | 1,818    | 6.48  | 0.51 (0.49, 0.54) | 682       | 6.14  | 0.49 (0.45, 0.52) | 9,351    | 5.17  | 0.41 (0.40, 0.42) |
| <b>By region</b>                |           |       |                   |          |       |                   |          |       |                   |           |       |                   |          |       |                   |
| Capital cities                  | 11,267    | 16.28 | 1.29 (1.26, 1.31) | 9,736    | 15.68 | 1.24 (1.21, 1.27) | 4,568    | 14.21 | 1.12 (1.09, 1.16) | 1,674     | 15.45 | 1.22 (1.16, 1.28) | 27,332   | 12.32 | 0.97 (0.96, 0.99) |
| Regional centres                | 3,423     | 17.57 | 1.39 (1.34, 1.44) | 3,269    | 17.72 | 1.40 (1.35, 1.45) | 1,550    | 13.65 | 1.03 (1.03, 1.14) | 584       | 15.96 | 1.26 (1.16, 1.37) | 8,869    | 12.86 | 1.02 (1.00, 1.04) |
| Rural & remote areas            | 3,611     | 20.58 | 1.63 (1.57, 1.68) | 3,223    | 17.23 | 1.36 (1.31, 1.41) | 1,686    | 14.88 | 1.18 (1.12, 1.23) | 515       | 15.37 | 1.21 (1.11, 1.32) | 9,092    | 13.55 | 1.07 (1.05, 1.09) |
| <b>By methods</b>               |           |       |                   |          |       |                   |          |       |                   |           |       |                   |          |       |                   |
| Firearms & other explosives     | 2,795     | 2.63  | 0.21 (0.20, 0.22) | 2,285    | 2.30  | 0.18 (0.18, 0.19) | 1,674    | 3.05  | 0.24 (0.23, 0.25) | 556       | 3.11  | 0.25 (0.23, 0.27) | 7,348    | 2.07  | 0.16 (0.16, 0.17) |
| Gases & vapours                 | 3,457     | 3.25  | 0.26 (0.25, 0.27) | 4,104    | 4.13  | 0.33 (0.32, 0.34) | 1,277    | 2.33  | 0.18 (0.17, 0.20) | 375       | 2.10  | 0.17 (0.15, 0.18) | 9,214    | 2.60  | 0.20 (0.20, 0.21) |
| Hanging                         | 7,366     | 6.93  | 0.55 (0.54, 0.56) | 4,927    | 4.96  | 0.39 (0.38, 0.41) | 2,301    | 4.20  | 0.33 (0.32, 0.35) | 901       | 5.05  | 0.40 (0.37, 0.43) | 15,620   | 4.40  | 0.35 (0.34, 0.35) |
| Solid or liquid substances      | 2,166     | 2.04  | 0.16 (0.16, 0.17) | 2,863    | 2.88  | 0.23 (0.22, 0.24) | 1,333    | 2.43  | 0.19 (0.18, 0.20) | 434       | 2.43  | 0.19 (0.18, 0.21) | 6,807    | 1.92  | 0.15 (0.15, 0.15) |
| Other                           | 2,517     | 1.26  | 0.19 (0.18, 0.20) | 2,049    | 2.06  | 0.16 (0.16, 0.17) | 1,219    | 2.22  | 0.18 (0.17, 0.19) | 507       | 2.84  | 0.23 (0.21, 0.25) | 6,294    | 1.78  | 0.14 (0.14, 0.14) |
| <b>By region and by sex</b>     |           |       |                   |          |       |                   |          |       |                   |           |       |                   |          |       |                   |
| Male                            |           |       |                   |          |       |                   |          |       |                   |           |       |                   |          |       |                   |
| Capital cities                  | 9,072     | 26.66 | 2.08 (2.03, 2.13) | 7,439    | 24.59 | 1.92 (1.87, 1.97) | 3,358    | 21.86 | 1.71 (1.65, 1.77) | 1,179     | 30.02 | 2.35 (2.22, 2.49) | 21,107   | 19.63 | 1.53 (1.51, 1.56) |
| Regional centres                | 2,868     | 29.90 | 2.33 (2.25, 2.42) | 2,593    | 28.60 | 2.23 (2.15, 2.32) | 1,213    | 22.21 | 1.74 (1.64, 1.84) | 468       | 32.80 | 2.57 (2.35, 2.81) | 7,173    | 21.39 | 1.67 (1.63, 1.71) |
| Rural/remote areas              | 3,119     | 32.46 | 2.72 (2.62, 2.82) | 2,640    | 25.99 | 2.16 (2.08, 2.24) | 1,415    | 23.73 | 1.94 (1.84, 2.04) | 444       | 31.82 | 2.60 (2.37, 2.85) | 7,662    | 21.39 | 1.77 (1.73, 1.82) |
| Female                          |           |       |                   |          |       |                   |          |       |                   |           |       |                   |          |       |                   |
| Capital cities                  | 2,195     | 6.40  | 0.50 (0.48, 0.52) | 2,297    | 7.39  | 0.58 (0.55, 0.60) | 1,210    | 7.33  | 0.57 (0.54, 0.61) | 495       | 7.26  | 0.57 (0.52, 0.62) | 6,225    | 5.58  | 0.44 (0.42, 0.45) |
| Regional centres                | 555       | 5.75  | 0.45 (0.42, 0.49) | 676      | 7.37  | 0.58 (0.53, 0.62) | 337      | 5.83  | 0.46 (0.41, 0.51) | 116       | 5.27  | 0.41 (0.34, 0.50) | 1,696    | 4.91  | 0.38 (0.37, 0.40) |
| Rural/remote areas              | 492       | 5.43  | 0.43 (0.39, 0.47) | 583      | 6.12  | 0.51 (0.47, 0.55) | 271      | 4.71  | 0.39 (0.34, 0.43) | 71        | 3.41  | 0.28 (0.22, 0.35) | 1,430    | 4.13  | 0.34 (0.33, 0.36) |
| <b>By methods and by region</b> |           |       |                   |          |       |                   |          |       |                   |           |       |                   |          |       |                   |
| Capital cities                  |           |       |                   |          |       |                   |          |       |                   |           |       |                   |          |       |                   |
| Firearms & other explosives     | 1,148     | 1.66  | 0.13 (0.12, 0.14) | 913      | 1.47  | 0.12 (0.11, 0.12) | 626      | 1.95  | 0.15 (0.14, 0.17) | 211       | 1.95  | 0.16 (0.14, 0.18) | 2,908    | 1.31  | 0.10 (0.10, 0.11) |
| Gases & vapours                 | 2,299     | 3.32  | 0.26 (0.25, 0.27) | 2,420    | 3.90  | 0.31 (0.30, 0.32) | 732      | 2.28  | 0.18 (0.17, 0.19) | 222       | 2.05  | 0.16 (0.14, 0.19) | 5,674    | 2.56  | 0.20 (0.20, 0.21) |
| Hanging                         | 4,339     | 6.27  | 0.50 (0.48, 0.51) | 3,017    | 4.86  | 0.38 (0.37, 0.40) | 1,470    | 4.57  | 0.36 (0.34, 0.38) | 591       | 5.45  | 0.43 (0.40, 0.47) | 9,478    | 4.27  | 0.30 (0.30, 0.31) |
| Solid or liquid substances      | 1,547     | 2.24  | 0.18 (0.17, 0.19) | 1,864    | 3.00  | 0.24 (0.23, 0.25) | 901      | 2.80  | 0.22 (0.21, 0.24) | 284       | 2.62  | 0.21 (0.19, 0.23) | 4,600    | 2.07  | 0.16 (0.16, 0.17) |
| Other                           | 1,934     | 2.79  | 0.22 (0.21, 0.23) | 1,522    | 2.45  | 0.19 (0.18, 0.20) | 839      | 2.61  | 0.21 (0.19, 0.22) | 366       | 3.38  | 0.27 (0.24, 0.30) | 4,672    | 2.11  | 0.17 (0.16, 0.17) |
| Regional centres                |           |       |                   |          |       |                   |          |       |                   |           |       |                   |          |       |                   |
| Firearms & other explosives     | 603       | 3.09  | 0.25 (0.23, 0.27) | 495      | 2.68  | 0.21 (0.20, 0.23) | 368      | 3.24  | 0.26 (0.23, 0.28) | 131       | 3.58  | 0.28 (0.24, 0.33) | 1,606    | 2.33  | 0.19 (0.18, 0.19) |
| Gases & vapours                 | 631       | 3.24  | 0.26 (0.24, 0.28) | 861      | 4.67  | 0.37 (0.35, 0.40) | 275      | 2.42  | 0.19 (0.17, 0.22) | 91        | 2.49  | 0.20 (0.16, 0.24) | 1,858    | 2.70  | 0.21 (0.20, 0.22) |
| Hanging                         | 1,502     | 7.71  | 0.61 (0.58, 0.64) | 1,026    | 5.56  | 0.44 (0.41, 0.47) | 456      | 4.02  | 0.32 (0.29, 0.35) | 187       | 5.11  | 0.40 (0.35, 0.46) | 3,200    | 4.65  | 0.37 (0.36, 0.38) |
| Solid or liquid substances      | 344       | 1.77  | 0.14 (0.13, 0.16) | 570      | 3.09  | 0.25 (0.23, 0.27) | 258      | 2.27  | 0.18 (0.16, 0.20) | 92        | 2.51  | 0.20 (0.16, 0.24) | 1,268    | 1.84  | 0.15 (0.14, 0.15) |
| Other                           | 343       | 1.76  | 0.14 (0.13, 0.16) | 317      | 1.72  | 0.14 (0.12, 0.15) | 193      | 1.70  | 0.14 (0.12, 0.16) | 83        | 2.27  | 0.18 (0.15, 0.22) | 937      | 1.36  | 0.11 (0.10, 0.12) |



Table 1: Suicide deaths and rate (per 100,000) across different groups in Australia (1986-2005, continued)

| Population group             | Age group     |              |                          | 35 to 54      |              |                          | 55 to 74     |              |                          | 75 & over    |              |                          | All ages      |              |                   |
|------------------------------|---------------|--------------|--------------------------|---------------|--------------|--------------------------|--------------|--------------|--------------------------|--------------|--------------|--------------------------|---------------|--------------|-------------------|
|                              | Cases         | Rate         | RR (95% CI)              | Cases         | Rate         | RR (95% CI)              | Cases        | Rate         | RR (95% CI)              | Cases        | Rate         | RR (95% CI)              | Cases         | Rate         | RR (95% CI)       |
| <b>Rural/remote areas</b>    |               |              |                          |               |              |                          |              |              |                          |              |              |                          |               |              |                   |
| Firearms & other explosives  | 1,044         | 5.95         | 0.47 (0.44, 0.50)        | 877           | 4.69         | 0.37 (0.35, 0.40)        | 680          | 6.00         | 0.48 (0.44, 0.51)        | 214          | 6.39         | 0.51 (0.44, 0.52)        | 2,834         | 4.22         | 0.33 (0.32, 0.35) |
| Gases & vapours              | 527           | 3.00         | 0.24 (0.22, 0.26)        | 823           | 4.40         | 0.35 (0.33, 0.37)        | 270          | 2.38         | 0.19 (0.17, 0.21)        | 62           | 1.85         | 0.15 (0.11, 0.19)        | 1,682         | 2.51         | 0.20 (0.19, 0.21) |
| Hanging                      | 1,525         | 8.69         | 0.69 (0.65, 0.72)        | 884           | 4.73         | 0.37 (0.35, 0.40)        | 375          | 3.31         | 0.26 (0.24, 0.29)        | 123          | 3.67         | 0.29 (0.24, 0.35)        | 2,942         | 4.38         | 0.35 (0.33, 0.36) |
| Solid or liquid substances   | 275           | 1.57         | 0.12 (0.11, 0.14)        | 429           | 2.29         | 0.18 (0.17, 0.20)        | 174          | 1.54         | 0.12 (0.11, 0.14)        | 58           | 1.73         | 0.14 (0.11, 0.18)        | 939           | 1.40         | 0.11 (0.10, 0.12) |
| Other                        | 240           | 1.37         | 0.11 (0.10, 0.12)        | 210           | 1.12         | 0.09 (0.08, 0.10)        | 187          | 1.65         | 0.13 (0.11, 0.15)        | 58           | 1.73         | 0.14 (0.11, 0.18)        | 695           | 1.04         | 0.08 (0.08, 0.09) |
| <b>By methods and by sex</b> |               |              |                          |               |              |                          |              |              |                          |              |              |                          |               |              |                   |
| <b>Male</b>                  |               |              |                          |               |              |                          |              |              |                          |              |              |                          |               |              |                   |
| Firearms & other explosives  | 2,555         | 4.80         | 0.38 (0.37, 0.40)        | 2,123         | 4.29         | 0.34 (0.33, 0.36)        | 1,605        | 5.99         | 0.48 (0.45, 0.50)        | 551          | 8.16         | 0.65 (0.60, 0.70)        | 6,869         | 3.88         | 0.31 (0.30, 0.32) |
| Gases & vapours              | 2,961         | 5.56         | 0.44 (0.42, 0.46)        | 3,428         | 6.93         | 0.55 (0.53, 0.57)        | 1,091        | 4.07         | 0.32 (0.30, 0.34)        | 324          | 4.80         | 0.38 (0.34, 0.43)        | 7,805         | 4.41         | 0.35 (0.34, 0.36) |
| Hanging                      | 6,267         | 11.77        | 0.93 (0.91, 0.96)        | 4,115         | 8.32         | 0.66 (0.64, 0.68)        | 1,821        | 6.80         | 0.54 (0.51, 0.56)        | 670          | 9.93         | 0.79 (0.73, 0.85)        | 12,963        | 7.33         | 0.58 (0.57, 0.59) |
| Solid or liquid substances   | 1,301         | 2.44         | 0.19 (0.18, 0.20)        | 1,573         | 3.18         | 0.25 (0.24, 0.27)        | 671          | 2.51         | 0.20 (0.18, 0.21)        | 198          | 2.93         | 0.23 (0.20, 0.27)        | 3,746         | 2.12         | 0.17 (0.16, 0.17) |
| Other                        | 1,975         | 3.72         | 0.29 (0.28, 0.31)        | 1,433         | 2.89         | 0.23 (0.22, 0.24)        | 798          | 2.98         | 0.24 (0.22, 0.25)        | 348          | 5.16         | 0.41 (0.37, 0.46)        | 4,559         | 2.58         | 0.20 (0.20, 0.21) |
| <b>Female</b>                |               |              |                          |               |              |                          |              |              |                          |              |              |                          |               |              |                   |
| Firearms & other explosives  | 240           | 0.45         | 0.04 (0.03, 0.04)        | 162           | 0.33         | 0.03 (0.02, 0.03)        | 69           | 0.25         | 0.02 (0.02, 0.03)        | 5            | 0.05         | 0.00 (0.00, 0.01)        | 479           | 0.26         | 0.02 (0.02, 0.02) |
| Gases & vapours              | 496           | 0.94         | 0.07 (0.07, 0.08)        | 676           | 1.36         | 0.11 (0.10, 0.12)        | 186          | 0.66         | 0.05 (0.05, 0.06)        | 51           | 0.46         | 0.04 (0.03, 0.05)        | 1,409         | 0.78         | 0.06 (0.06, 0.07) |
| Hanging                      | 1,099         | 2.07         | 0.16 (0.15, 0.17)        | 812           | 1.63         | 0.12 (0.11, 0.13)        | 480          | 1.71         | 0.14 (0.12, 0.15)        | 231          | 2.08         | 0.17 (0.15, 0.19)        | 2,657         | 1.47         | 0.12 (0.11, 0.12) |
| Solid or liquid substances   | 865           | 1.63         | 0.13 (0.12, 0.14)        | 1,290         | 2.59         | 0.21 (0.19, 0.22)        | 662          | 2.36         | 0.19 (0.17, 0.20)        | 236          | 2.13         | 0.17 (0.15, 0.19)        | 3,061         | 1.69         | 0.13 (0.13, 0.14) |
| Other                        | 542           | 1.03         | 0.08 (0.07, 0.09)        | 616           | 1.23         | 0.10 (0.09, 0.11)        | 421          | 1.50         | 0.12 (0.11, 0.13)        | 163          | 1.42         | 0.12 (0.10, 0.14)        | 1,745         | 0.97         | 0.08 (0.07, 0.08) |
| <b>Total suicide</b>         | <b>18,301</b> | <b>17.23</b> | <b>1.36 (1.34, 1.38)</b> | <b>16,228</b> | <b>16.35</b> | <b>1.29 (1.27, 1.32)</b> | <b>7,804</b> | <b>14.23</b> | <b>1.12 (1.10, 1.15)</b> | <b>2,773</b> | <b>15.54</b> | <b>1.23 (1.18, 1.28)</b> | <b>45,293</b> | <b>12.66</b> |                   |

Note: population size (all and by groups) was based on the mean value of Australian population census (1986, 1991, 1996, 2001, 2006). Relative risk (RR) was calculated using the mean annual suicide rate of the whole country as a reference.

Table 2: Suicide rate change over time (population groups and suicide methods)

|                            | RR   | 95% CI     | P-value |
|----------------------------|------|------------|---------|
| All suicide                | 0.99 | 0.99, 0.99 | <0.001  |
| Male                       | 0.99 | 0.99, 0.99 | <0.001  |
| Female                     | 0.99 | 0.99, 0.99 | <0.001  |
| Age 15-34                  | 0.99 | 0.99, 1.00 | <0.001  |
| Age 35-54                  | 1.00 | 0.99, 1.00 | 0.009   |
| Age 55-74                  | 0.97 | 0.97, 0.98 | <0.001  |
| Age 75 & over              | 0.97 | 0.97, 0.98 | <0.001  |
| Urban areas                | 0.99 | 0.99, 0.99 | 0.001   |
| Regional areas             | 1.00 | 0.99, 1.00 | 0.019   |
| Rural & remote areas       | 1.00 | 0.99, 1.00 | 0.022   |
| Firearm                    | 0.93 | 0.93, 0.94 | <0.001  |
| Hanging                    | 1.04 | 1.03, 1.04 | <0.001  |
| Gas and vapour             | 0.99 | 0.98, 0.99 | <0.001  |
| Solid or liquid substances | 0.97 | 0.96, 0.97 | <0.001  |
| Other methods              | 0.98 | 0.98, 0.98 | <0.001  |

Table 3: Male suicide rate by firearms change over time (Reference: mean annual male suicide rate in 1986-1990 by each of age groups and types of regions)

| Population group       | Time period | RR   | 95% CI     | P-value |
|------------------------|-------------|------|------------|---------|
| 15-34 yrs              | 2001-2005   | 0.22 | 0.08, 0.36 | <0.001  |
|                        | 1996-2000   | 0.39 | 0.28, 0.51 | <0.001  |
|                        | 1991-1995   | 0.78 | 0.69, 0.87 | <0.001  |
| 35-54 yrs              | 2001-2005   | 0.39 | 0.26, 0.51 | <0.001  |
|                        | 1996-2000   | 0.52 | 0.40, 0.64 | <0.001  |
|                        | 1991-1995   | 0.83 | 0.72, 0.94 | 0.001   |
| 55-74 yrs              | 2001-2005   | 0.43 | 0.28, 0.57 | <0.001  |
|                        | 1996-2000   | 0.63 | 0.49, 0.76 | <0.001  |
|                        | 1991-1995   | 0.88 | 0.75, 1.01 | 0.049   |
| 75 yrs & over          | 2001-2005   | 0.45 | 0.21, 0.69 | <0.001  |
|                        | 1996-2000   | 0.66 | 0.43, 0.89 | <0.001  |
|                        | 1991-1995   | 0.83 | 0.59, 1.06 | 0.103   |
| Capital cities         | 2001-2005   | 0.33 | 0.21, 0.45 | <0.001  |
|                        | 1996-2000   | 0.46 | 0.35, 0.57 | <0.001  |
|                        | 1991-1995   | 0.78 | 0.69, 0.88 | <0.001  |
| Regional centres       | 2001-2005   | 0.32 | 0.17, 0.48 | <0.001  |
|                        | 1996-2000   | 0.47 | 0.33, 0.61 | <0.001  |
|                        | 1991-1995   | 0.78 | 0.65, 0.90 | <0.001  |
| Rural and remote areas | 2001-2005   | 0.41 | 0.29, 0.53 | <0.001  |
|                        | 1996-2000   | 0.61 | 0.50, 0.72 | <0.001  |
|                        | 1991-1995   | 0.91 | 0.81, 1.00 | 0.048   |

1  
2  
3  
4  
5  
6  
7  
8  
9  
10  
11  
12  
13  
14  
15  
16  
17  
18  
19  
20  
21  
22  
23  
24  
25  
26  
27  
28  
29  
30  
31  
32  
33  
34  
35  
36  
37  
38  
39  
40  
41  
42  
43  
44  
45  
46  
47  
48  
49  
50  
51  
52  
53  
54  
55  
56  
57  
58  
59  
60

Supplemental 1: Time trend of suicide rates by methods, sexes, age groups and urban/rural areas (part 1).

Supplemental 2: Time trend of suicide rates by methods, sexes, age groups and urban/rural areas (part 2).

For peer review only

1  
2  
3  
4  
5  
6  
7  
8  
9  
10  
11  
12  
13  
14  
15  
16  
17  
18  
19  
20  
21  
22  
23  
24  
25  
26  
27  
28  
29  
30  
31  
32  
33  
34  
35  
36  
37  
38  
39  
40  
41  
42  
43  
44  
45  
46  
47  
48  
49  
50  
51  
52  
53  
54  
55  
56  
57  
58  
59  
60

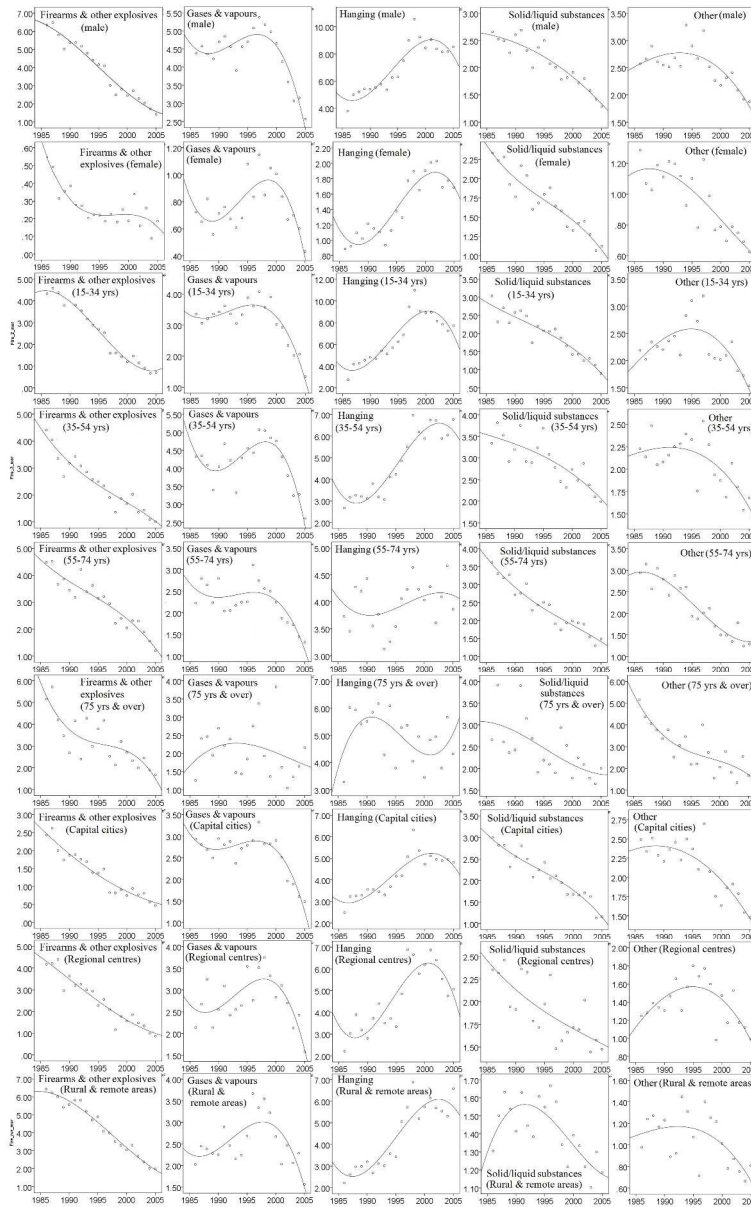

694x1103mm (96 x 96 DPI)

1  
2  
3  
4  
5  
6  
7  
8  
9  
10  
11  
12  
13  
14  
15  
16  
17  
18  
19  
20  
21  
22  
23  
24  
25  
26  
27  
28  
29  
30  
31  
32  
33  
34  
35  
36  
37  
38  
39  
40  
41  
42  
43  
44  
45  
46  
47  
48  
49  
50  
51  
52  
53  
54  
55  
56  
57  
58  
59  
60

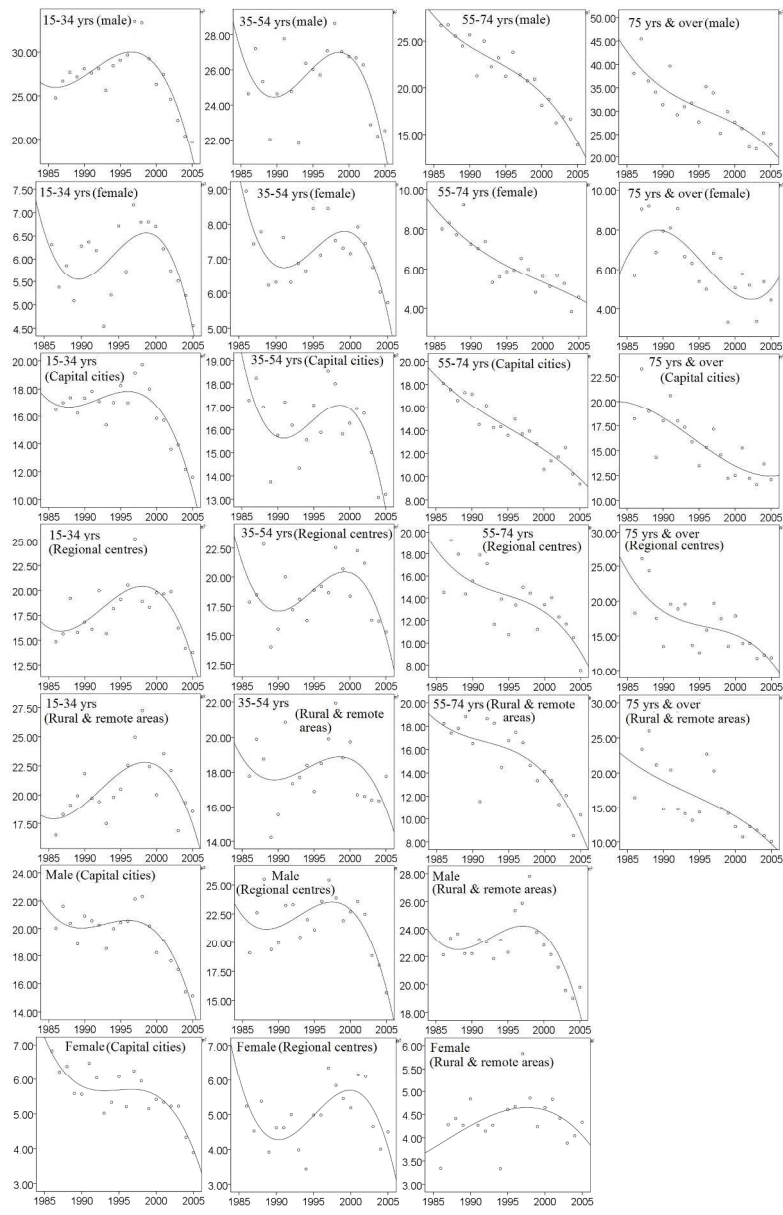

552x851mm (96 x 96 DPI)

# BMJ Open

## Dynamic pattern of suicide in Australia, 1986–2005

|                                 |                                                                                                                                                                                                                                                                                                                                                                                                                  |
|---------------------------------|------------------------------------------------------------------------------------------------------------------------------------------------------------------------------------------------------------------------------------------------------------------------------------------------------------------------------------------------------------------------------------------------------------------|
| Journal:                        | <i>BMJ Open</i>                                                                                                                                                                                                                                                                                                                                                                                                  |
| Manuscript ID:                  | bmjopen-2014-005311.R1                                                                                                                                                                                                                                                                                                                                                                                           |
| Article Type:                   | Research                                                                                                                                                                                                                                                                                                                                                                                                         |
| Date Submitted by the Author:   | 20-Jun-2014                                                                                                                                                                                                                                                                                                                                                                                                      |
| Complete List of Authors:       | Qi, Xin; Xi'an Jiaotong University, School of Public Health; Queensland University of Technology, School of Public Health and Social Work<br>Hu, Wenbiao ; Queensland University of Technology, School of Public Health and Social Work<br>Page, Andrew; University of Western Sydney, School of Science and Health<br>Tong, Shilu; Queensland University of Technology, School of Public Health and Social Work |
| <b>Primary Subject Heading</b>: | Public health                                                                                                                                                                                                                                                                                                                                                                                                    |
| Secondary Subject Heading:      | Mental health, Epidemiology                                                                                                                                                                                                                                                                                                                                                                                      |
| Keywords:                       | Australia, Suicide, Pattern                                                                                                                                                                                                                                                                                                                                                                                      |
|                                 |                                                                                                                                                                                                                                                                                                                                                                                                                  |

SCHOLARONE™  
Manuscripts

# Dynamic pattern of suicide in Australia, 1986–2005

## Author details

Xin Qi<sup>1,2</sup>, Wenbiao Hu<sup>2</sup>, Andrew Page<sup>3</sup>, Shilu Tong<sup>2</sup>

1. Xi'an Jiaotong University, China

2. Queensland University of Technology, Australia

3. University of Western Sydney, Australia

Dr. Xin Qi, School of Public Health, Xi'an Jiaotong University, 76 Yanta Xilu, Xi'an, Shaanxi 710061, China; School of Public Health and Social Work, Queensland University of Technology, Kelvin Grove, QLD, 4059, Australia

Tel: +86 188 2944 7238; Email: [chester.qi@yahoo.com](mailto:chester.qi@yahoo.com)

Dr. Wenbiao Hu, School of Public Health and Social Work, Queensland University of Technology, Kelvin Grove, QLD, 4059, Australia

Tel: +61 7 3138 5724; Email: [w2.hu@qut.edu.au](mailto:w2.hu@qut.edu.au)

Prof. Andrew Page, School of Science and Health, University of Western Sydney, Building 24, Room 4.53D, Campbelltown Campus, Locked Bag, 1797, Penrith NSW 2517, Australia

Tel: +61 2 4620 3537; Fax: +61 2 4620 3792; Email: [a.page@uws.edu.au](mailto:a.page@uws.edu.au)

Prof. Shilu Tong, School of Public Health and Social Work, Queensland University of Technology, Kelvin Grove, QLD, 4059, Australia

Tel: +61 7 3138 9745; Fax: +61 7 3138 3369; Email: [s.tong@qut.edu.au](mailto:s.tong@qut.edu.au)

Author for correspondence

Dr. Xin Qi



## ABSTRACT

**Objective:** This study explored the spatiotemporal variations of suicide across Australia from 1986 to 2005, discussed the reasons for dynamic changes and recommended future suicide research and prevention strategies.

**Design:** Suicide (1986–2005) and population data were obtained from the Australian Bureau of Statistics. A series of analyses were conducted to examine the suicide pattern by sex, method and age group over time and space.

**Results:** Apparent differences in suicide rates across sex, age groups and suicide methods were found across different geographical areas. Male suicides were mainly completed by hanging, firearms, gases and poison. Female suicides were primarily completed by hanging and poison. Suicide rates were high in rural areas than urban areas (capital cities and regional centres). Suicide rate by firearms was higher in rural areas than urban areas, while the pattern for poison was opposite. Suicide rates slightly fluctuated for total population and aged between 15 and 54, while suicide decreased among 55 years and over during the study period. There was a decrease of suicide by firearms during the study period especially after 1996 when new firearm control law was implemented; while suicide by hanging kept increasing. Some areas with a high proportion of Indigenous population (e.g., northwest of Queensland and top north of Northern Territory) had a high increase of suicide incidence after 1995.

**Conclusions:** Suicide rates varied over time and space and across sexes, age groups, suicide methods. Suicide control and prevention strategies should target particular groups and areas of high and increased risk (e.g., Indigenous communities).

**Key words:** suicide, Australia, pattern

## STRENGTHS AND LIMITATIONS OF THE STUDY

This study used various cross-tabulations with the 20-year Australian national suicide data cut in different ways (e.g., population group, suicide methods, time and space), and provides valuable information for examining suicide trends in Australia.

The different suicide rates across population groups and by suicide methods were presented, which may help in designing effective suicide control and prevention programs. Different levels of spatial scales (Local Government Area (LGA) and Statistical Local Area (SLA)) were combined to best display the spatial distribution of suicide patterns; and the boundary changes over years were also adjusted using advanced GIS methods.

This study only examined the suicide pattern at the population level using aggregated data. Detailed individual information such as marriage, employment, Indigenous status and health status before suicide was not available in the current dataset. Thus ecological fallacy is inevitable in this study and the results should be cautious when interpreted at the individual level.

The quality of suicide data may influence the results of the study. There is evidence suggesting that some suicide deaths were not covered in the current ABS database. The real suicide rate may be underestimated so the results should be interpreted with caution.

The suicide database was acquired a few years ago and may not indicate the trend of suicide after 2005.

## INTRODUCTION

Suicide has long been regarded as a major public health issues globally, with about 1 million suicide deaths annually.<sup>1</sup> Suicide patterns, including suicide methods, time and geographical variation have been explored in many countries and regions, such as Brazil,<sup>2</sup> China,<sup>3</sup> India,<sup>4</sup> Russia,<sup>5</sup> Taiwan,<sup>6</sup> United Kingdom,<sup>7</sup> and United States.<sup>8</sup> In Australia, suicide rates have fluctuated since suicide registration started in the early of 1920s.<sup>9-11</sup> The trend of annual suicide rate from 1980 to now was relatively stable (around 9 to 10 per 100,000) except for a peak in 1997 (around 14.6 per 100,000).<sup>9-11</sup> However, there were still around 2,000 suicide deaths annually, mainly in male adults (25-54 years age). Thus, it is vital to understand the variations of suicide patterns over time, space, population groups (age, sex and ethnic groups) and the possible reasons for these variations, in order to design effective suicide control and prevention programs. Previous reports and studies have explored suicide patterns in Australia over time,<sup>9-12</sup> methods<sup>13</sup> and space.<sup>14</sup> From geographical aspect, Australian Bureau of Statistics (ABS) suicide reports covered a long period (1921 to 2010) and targeted at the state level and capital cities.<sup>9-11</sup> However, suicide patterns at the smaller area (e.g., Local Government Area, or LGA) level, especially in rural and remote areas, were not provided by the ABS reports. The study by Cheung et al examined the spatial pattern of suicide in Australia after 2000.<sup>15</sup> However, this study did not examine suicide pattern before 2000 or by suicide methods; thus the dynamic spatial pattern of suicide and high risk areas of suicide by particular method (e.g., firearms) could not be demonstrated. ABS reports indicated that most suicide occur in urban areas in Australia, while less suicide were recorded in rural and remote areas covering of most Australian land territory but with a lower population density. Thus it is vital in selecting suitable spatial scales in examining spatial pattern of suicide in Australia. The studies of spatial pattern of suicide in earlier years (e.g. before 1995) used relative large spatial scales (e.g., Statistical Division rather than LGA), which may mask the spatial

1  
2  
3  
4  
5  
6  
7  
8  
9  
10  
11  
12  
13  
14  
15  
16  
17  
18  
19  
20  
21  
22  
23  
24  
25  
26  
27  
28  
29  
30  
31  
32  
33  
34  
35  
36  
37  
38  
39  
40  
41  
42  
43  
44  
45  
46  
47  
48  
49  
50  
51  
52  
53  
54  
55  
56  
57  
58  
59  
60

variation of suicide in some rural areas (e.g., in Western Australia and Northern Territory) due to their large size.<sup>16 17</sup> The spatial patterns of suicide by different population groups and suicide methods over a long term covering both of previous years (e.g., before 2000) and more recent years (after 2000) using suitable spatial scales (e.g., LGA) have not yet been examined. The trends of suicide rates over time may differ across population groups (e.g., young or older adults) and areas (e.g., suicide by firearms in urban or rural areas). Thus, this study examined long-term (both dynamic and static), spatiotemporal patterns of Australian national suicide, using a range of different combinations of age, time, method, and location from the period 1986-2005.

## DESIGN

### Data source

The unit record data of suicide deaths between 1986 and 2005 were acquired from Australian Bureau of Statistics (ABS), including sex, International Classification of Disease (ICD) Code (ICD 9: 950.0-959.9; ICD 10: X60-X84)<sup>18 19</sup> relating to suicide or self-inflicted injury, age, country of birth, date of suicide and Statistical Local Area (SLA) code for place of suicide occurrence. The application of access to suicide database after 2005 is still under review by ABS. As SLA boundaries have changed dramatically over the study period, especially in urban areas, we chose Local Governmental Area (LGA) as the standard geographical unit to explore the spatial pattern of suicide. Choosing LGA as the spatial scale also aims to keep the balance of including a certain number of suicide in each geographical unit and avoiding using too large geographical unit. Each LGA is composed of one or more SLAs and the LGA boundaries are relatively stable over the study period. The Australian Standard Geographical Classification (ASGC), updated annually, was used to incorporate SLA codes into LGA codes, examine and adjust for SLA/LGA boundary changes over time. CDATA 2001, a

1  
2  
3 product issued by ABS, provided digital boundaries and socio-demographic data of Australia  
4 (including 1991, 1996 and 2001 population census data at SLA/LGA levels, based on 2001  
5 Census boundary) and was applied in MapInfo 10.5 software package for map display.<sup>20</sup>  
6  
7 Population data (SLA/LGA levels) in 1986 and 2006 Census from ABS were merged with  
8  
9 2001 Census data after adjustment for boundary changes using ASGC references. The suicide  
10 rates in different groups over time and across LGAs were then calculated. In this study, we  
11  
12 categorize LGAs as three types: metropolitan areas of capital cities, regional centres (other  
13 LGA named as “city” outside of capital cities, e.g., City of Townville), rural and remote areas  
14 (the remaining LGAs).  
15  
16  
17  
18  
19  
20  
21  
22

23 Most areas in South Australia (SA) and Northern Territory (NT) have a very low population  
24 density and were defined as unincorporated areas by ABS at the LGA level, but these areas  
25 were also composed of 27 SLAs according to the 2001 Census data. Thus we applied SLA  
26 data in unincorporated areas in SA and NT to provide more detailed information. In the 2001  
27 Census, Australia was divided into 628 LGAs, plus 27 SLAs in the unincorporated areas of  
28 SA and NT. Ethical approval was granted by the Human Research Ethics Committee,  
29 Queensland University of Technology.  
30  
31  
32  
33  
34  
35  
36  
37  
38

### 39 **Statistical analyses**

40  
41  
42 Descriptive and mapping approaches were applied to explore the age, sex, method, time and  
43 regional-specific patterns of suicide cases and rates. Firstly, we explored the basic pattern of  
44 suicide among different groups by calculating suicide rates, Rate Ratio and 95% Confident  
45 Interval (CI) to annual mean of national suicide rate over the study period using the annual  
46 average suicide number in the whole Australia and population (1986-2005) as reference  
47 group. Then the temporal trends of suicide rates in population groups were examined, using  
48 yearly data and Poisson regression. Suicide in 1986 and by methods and population groups  
49  
50  
51  
52  
53  
54  
55  
56  
57  
58  
59  
60

1  
2 was the reference group and we used logarithm transferred population size in different years  
3 as an offset in Poisson regression. Suicide year was regarded as a covariate. All the statistical  
4 analyses were implemented by SPSS 21.0.<sup>21</sup> Finally suicide rates at the LGA level were  
5 applied to display suicide rates over sexes, age groups and suicide methods using mapping  
6 approaches by MapInfo 10.5.<sup>20</sup> We used the annual average sex-specific rates for the whole of  
7 Australia over the entire study period as the reference to calculate age-adjusted standardised  
8 mortality ratio (SMR) of both sexes which were mapped.  
9  
10  
11  
12  
13  
14  
15  
16  
17  
18

## 19 RESULTS

20  
21 This study included 45,293 suicide deaths in 20 years and only 187 suicides aged below 15,  
22 about 0.4% of total suicides. Thus we did not specifically analyse the pattern of suicide below  
23 15 years; however, we still keep them in results of all-age groups. Table 1 indicates that most  
24 of suicides occurred in those aged between 15 and 54 and occurred in capital cities and  
25 regional centres, as the majority of Australian population live in urban areas. However,  
26 suicide rate in rural and remote areas was higher than that in urban areas. Around 80% of  
27 suicides were males and most suicides aged between 15 and 54 years, while older males (75-  
28 year and over) had higher suicide rate than males in other age groups. Most suicides were in  
29 four methods: (1) firearms, air guns and other explosive (simplified as firearms, 16% of total  
30 suicides); (2) hanging (35% of total); (3) gases and vapours (20% of total); (4) solid or liquid  
31 substances (15% of total). The Odds Ratio (OR) and 95% Confident Interval (CI) of suicide in  
32 each population group and by different methods were calculated, using annual average suicide  
33 incidence in the study period in Australia as a reference (Table 1). We also applied Chi square  
34 test to check the suicide cases distribution by population groups and methods, and all the  
35 results are significant.  
36  
37  
38  
39  
40  
41  
42  
43  
44  
45  
46  
47  
48  
49  
50  
51  
52  
53  
54

55  
56 Table 1 about here  
57  
58  
59  
60

1  
2  
3  
4  
5  
6  
7  
8  
9  
10  
11  
12  
13  
14  
15  
16  
17  
18  
19  
20  
21  
22  
23  
24  
25  
26  
27  
28  
29  
30  
31  
32  
33  
34  
35  
36  
37  
38  
39  
40  
41  
42  
43  
44  
45  
46  
47  
48  
49  
50  
51  
52  
53  
54  
55  
56  
57  
58  
59  
60

Figure 1 shows the time-series trends of suicide by different groups. There was a peak of suicide rate among the total population from 1996 to 1998, particularly in males aged from 15 to 34 years (A), males in rural and remote areas (B) and suicide completed by hanging (C). In the early years of the study period, suicide incidence among 55 years and over was higher than those below 55 years, however, it was observed to drop lower than that of young and middle aged adults after 2000, particular in males (A). Suicide rate among 15 to 34 years had peaks in 1997 and 1998 (especially for male at around 34 per 100,000 and total at around 21 per 100,000) and kept relatively steady in other years (14 to 17 per 100,000 for total and 25 to 28 per 100,000 for male) (A). In 1986, firearms and other explosives were the most common methods of suicide in Australia, over 6 per 100,000 among males. However, the rate dropped to around 2 per 100,000 in 2005. By contrast, male suicide rate by hanging rose from 3.8 per 100,000 in 1986 to 9.4 per 100,000 in 2005, after experiencing a peak of 10.6 per 100,000 in 1998 (C). Suicide rates by hanging in males dropped after 1997 but were still higher than the early years of the study period. Figure 2 used 5-year periods to explore suicide of specific methods by age groups and urban rural differences for a better visual effect. Suicide rates by firearms decreased over the study period, especially among aged 15 to 54 years and in rural and remote areas (Figure 2A and 2B); while suicide by hanging increased dramatically and reached a peak from 1996 to 2000, especially among aged 15-54 years (Figure 2A). For aged 55 and elder, suicide rate by hanging and firearms kept more stable than aged 54 and younger over the study period. Suicide rates by gases and vapours, solid and liquid substances slightly fluctuated in the study period among all population groups (Figure 2A and 2B). More details of suicide incidence trend over time in each population group and suicide methods were indicated in Supplemental 1 and 2. Poisson regression was implemented to examine the time series trend of suicide rates across population groups and by methods (Table 2). Suicide rates by sex, 55 years and over, in urban areas, and completed by firearms, solid and liquid substances had significantly decreased over time. However, suicide rates by hanging

1  
2 significantly increased. In this study, there were more decreased male suicide rate by firearms  
3 from period 1991-1995 to period 1996-2000 than other adjacent period (from period 1980-  
4 1990 to period 1991-1995, and from period 1996-2000 to period 2001-2005) as Table 3  
5 indicated.  
6  
7  
8  
9  
10

11  
12 Figure 1 about here  
13

14  
15 Figure 2 about here  
16

17  
18 Table 2 about here  
19

20  
21 Table 3 about here  
22  
23

24 Figure 3 indicates that among 15 to 34 years, north and central south of Northern Territory  
25 (NT), northeast and some southern parts of Western Australia (WA), northwest and central  
26 inland areas of Queensland (QLD) and some inland areas of New South Wales (NSW) had  
27 higher suicide mortalities (2A). The patterns were also similar for males (NT, QLD and WA  
28 in B1). Population aged between 35 and 74 had fewer high-risk areas than that aged 15 to 34  
29 (A2 and A3). For those aged 75 and over, mortalities in north and inland of QLD and a few  
30 LGAs in NSW and WA was higher than other areas; around 40% of total LGAs and  
31 unincorporated SLAs in NT and SA had no suicide occurred. Compared with males, more  
32 areas, e.g., northeast NT, most of rural/remote areas in WA and inland QLD, had no female  
33 suicide (2B). Rural and remote areas had lower rates by self-poison than urban areas, except  
34 for some LGAs in inland QLD, east SA and south WA (2C).  
35  
36  
37  
38  
39  
40  
41  
42  
43  
44  
45  
46  
47  
48

49  
50 Figure 3 about here  
51

52  
53 As suicide rates by firearms and by hanging had more significant changes over time than  
54 other methods and by population groups, we also explored whether this trend existed in  
55 spatial scales over time by cutting the whole study period into four 5-year periods (Figure 4).  
56  
57  
58  
59  
60



1  
2  
3 Figure 4A indicates that suicide rate by hanging was low in the early years of study period  
4 (A1), and very few suicides occurred in rural and remote areas in WA, NT, QLD and NSW.  
5  
6 However, the suicide rate by hanging has increased in most areas of Australia since 1986.  
7  
8 North of WA, NT and SA, north of QLD and even urban LGAs had much higher suicide rates  
9  
10 between 1996 and 2005 compared with that in earlier years. Some areas (e.g., Mornington  
11  
12 Shire (MTS) of northwest of QLD, Bathurst-Melville (BM) of NT) had dramatic increase of  
13  
14 suicide by hanging. Both of them experienced increased number of suicide cases (especially  
15  
16 for suicide by hanging) between 1996 and 2005 (27 in MTS, 23 males and 26 by hanging; 23  
17  
18 in BM, 22 males and 20 by hanging), compared to that between 1986 and 1995 (4 in MTS,  
19  
20 male and 3 by hanging; 3 in BM, male and by hanging). Suicide rates by hanging in MTS  
21  
22 increased from 28.79 (1986-1995, annual average) to 236.32 per 100,000 (1996-2005, annual  
23  
24 average); and in BM increased from 14.10 (1986-1995, annual average) to 86.39 per 100,000  
25  
26 (1996-2005, annual average). However, the trend of suicide by firearms was opposite to that  
27  
28 of suicide by hanging (Figure 4B), especially in SA and NT, north and inland areas in NSW  
29  
30 and QLD, and middle of WA (B1 and B2). In general, unincorporated NT and SA had much  
31  
32 more suicide cases reported after 1996 (123 from 1996 to 2005) compared with the period  
33  
34 before 1996 (22 from 1986-1995).  
35  
36  
37  
38  
39  
40

41 Figure 4 about here  
42  
43

## 44 DISCUSSION

45  
46  
47 This study explored suicide patterns in a range of different combinations of age, time,  
48  
49 method, and location in Australia, using both dynamic (trends over time) and static (averages  
50  
51 over the entire study period) approaches. Males accounted for most suicides. Suicide rate was  
52  
53 relatively higher among youths, young and middle-aged adults, in rural and remote areas, and  
54  
55 by hanging and by firearms. However, suicide rate among 55 years and over was higher than  
56  
57  
58  
59  
60

1  
2  
3 population aged below 55 in the early years of the study period and then decreased  
4 significantly, especially for older males. Suicide by firearms decreased during the study  
5 period, while suicide by hanging kept increasing, especially in males and rural/remote areas.  
6  
7 The spatial and spatiotemporal patterns of suicide were consistent with yearly mean and  
8 temporal trends of suicide among different groups.  
9

10  
11  
12  
13  
14 Elderly and upper middle-aged adults (55-years and over) usually have more loneliness and  
15 other health issues (e.g., chronic diseases) compared with the younger age population, which  
16 may lead to psychiatric symptoms, e.g., anxiety, sense of hopelessness and despair.<sup>22 23</sup> And  
17 usually older adults are less likely to seek psychiatric support when they have relevant  
18 symptoms, especially in earlier years (e.g., before the middle of 1990s).<sup>24</sup> Suicidal behaviours  
19 among older adults were attributed from psychiatric disorders among them, which were  
20 resulted from both of other health problems and reluctance for psychiatry support.<sup>22-24</sup> These  
21 may explain the higher annual average suicide rate among older adults than younger age  
22 groups in general, especially among males. However, suicide rate among this age group  
23 gradually decreased in the study period, especially after 2000, with an increased use of  
24 antidepressants among older adults.<sup>25</sup> Evidence also indicates that antidepressants can reduce  
25 psychological disorders, e.g., depression, and suicidal behaviours among the elderly,  
26 especially when combined with other interventions (e.g., counselling and family support).<sup>26</sup>  
27 Selective serotonin reuptake inhibitors have less side effects (e.g., cardiovascular impairs and  
28 drug interactions) than other drugs, and have been widely recommended to older adults from  
29 clinics.<sup>27 28</sup> Studies in other countries have also provided evidence about the protective effect  
30 of antidepressants on severe depression and suicide behaviours, although treatment of other  
31 levels of depression are still not clear.<sup>29 30</sup>  
32  
33  
34  
35  
36  
37  
38  
39  
40  
41  
42  
43  
44  
45  
46  
47  
48  
49  
50  
51  
52  
53  
54

55 The rate of suicide rate by fire arms kept decreasing during the study period while suicide by  
56 hanging increased, especially among 54 years and younger. A study in Victoria indicated that  
57  
58  
59  
60

1  
2  
3 a decreased registration of firearms and lower suicide rates were significantly correlated from  
4  
5 1997 to 2000.<sup>31</sup> Before 1996, the importation of firearms was controlled by the  
6  
7 Commonwealth; and the sales and possession of firearms were regulated by states and  
8  
9 territories in Australia.<sup>32</sup> Some states had lag in progressing firearm control.<sup>33</sup> The Port Arthur  
10  
11 Massacre in Tasmania proposed Australia enacting The National Firearms Agreement in  
12  
13 1996, which regulates firearm sale, registration, storage and “bans on specific types of  
14  
15 firearms” nationally.<sup>34</sup> Our study found more decreased male suicide rate by firearms from  
16  
17 period 1991-1995 to period 1996-2000 than comparing other adjacent periods (e.g., period  
18  
19 1991-1995 compared with period 1986-1990). Thus it is suggestive that more strict firearm  
20  
21 law enforcement may have led to significant lower suicide rate by firearms over an extended  
22  
23 period at the national level after 1996.<sup>31</sup> However, other studies indicated that decreased  
24  
25 firearm suicide rate in young adults was accompanied with rising suicide rates by other  
26  
27 methods at the national and local level.<sup>35 36</sup> Our study also found this trend, especially among  
28  
29 males. Similarly, other countries experienced decreased suicide rate by firearms and increased  
30  
31 suicide rate by hanging over time.<sup>37 38</sup> This may due to increased substitute methods (e.g.,  
32  
33 hanging) for firearms, especially after 1996 when availability of firearms dropped in  
34  
35 Australia.<sup>39</sup> Thus those who seek violent methods for suicide may prefer using hanging rather  
36  
37 than firearms. Youths and middle-aged adults, which are less adaptable to social changes and  
38  
39 less exposed to firearms compared with older adults, are more likely to stop using firearms  
40  
41 after new law enforcement but relatively fragile to social and family difficulties.<sup>33</sup> Thus the  
42  
43 changes of patterns of suicide by firearms and hanging are more dynamic among youths and  
44  
45 middle-aged adults than older adults. Suicide rate by firearms in rural areas was higher than  
46  
47 that in urban areas, owing much to the availability of firearms. More evidence, including the  
48  
49 interaction between socio-economic changes and suicide methods, still needs to be assessed,  
50  
51 especially for recent years.  
52  
53  
54  
55  
56  
57  
58  
59  
60

1  
2  
3 Only a small percentage of population and suicides were for those aged 75 and over, thus  
4 many LGAs had no suicides or higher suicide rate among older adults, especially in rural and  
5 remote areas. Usually areas with high risk of suicide have lower socio-economic status, along  
6 with higher proportion of Indigenous population.<sup>14</sup> Our previous study indicated that  
7 Mornington Shire in QLD and Bathurst-Melville in north of NT had much higher suicide risk,  
8 proportion of Indigenous population and lower socio-economic status than the national  
9 average, and both were indicated as high risk clusters using spatial cluster analysis (1999-  
10 2003).<sup>14</sup> Suicide by hanging has increased in Indigenous communities, as similar as other  
11 areas and population groups.<sup>38</sup> Alcohol has been introduced to the Aboriginal communities in  
12 Indigenous communities (e.g., Top North of NT and SA), and local people tended to be  
13 mentally and psychologically jeopardised by domestic violence and social disruptions related  
14 to alcohol use even from early years,<sup>40 41</sup> especially among youth and young adults.<sup>42</sup> Thus  
15 suicide behaviours were triggered from mental health problems after years of indirect  
16 influence from alcohol and can be spread quickly within an isolated community with limited  
17 population.<sup>43 44</sup> Family conflicts and social disruption have been reported contribution to the  
18 high suicide incidence in Indigenous population, e.g., lost of relatives in early lives due to a  
19 shorter life expectancy compared with non-Indigenous population, self-destructive and anti-  
20 social behaviours, unsolved anger and other life events.<sup>45</sup> Hanging acted as a substitute to  
21 other methods like firearms and poison, which may indicate that most Indigenous suicides  
22 were completed by hanging, especially after 1995.<sup>46</sup> Although Indigenous status of suicide  
23 was not available in this study, yet the results were consistent with previous studies. This  
24 mechanism may also explain the increased suicide cases in unincorporated areas in NT  
25 (including Bathurst-Melville) and SA in general over the study period.

26  
27  
28  
29  
30  
31  
32  
33  
34  
35  
36  
37  
38  
39  
40  
41  
42  
43  
44  
45  
46  
47  
48  
49  
50  
51  
52  
53  
54  
55 The differences of suicide reporting systems may also influence the results. For example,  
56 Williams et al reported that suicide rate in Queensland from the Queensland Suicide Register  
57  
58  
59  
60

1  
2  
3 (QSR) was higher than that from the Australian Bureau of Statistics (ABS), reasoning that the  
4  
5 disparity was due to such factors as information management and definition of suicidal  
6  
7 behaviours.<sup>47</sup> Thus the QLD suicide rate using ABS database was lower than using QSR  
8  
9 database, especially after 2000. However, ABS had a higher standard for evaluating the  
10  
11 causes of deaths, e.g., complete documents from hospital or police, which confirmed the  
12  
13 accuracy of information of current suicide database.<sup>48</sup> To keep the consistence of suicide data  
14  
15 reporting system across different states and accuracy of suicide database, we use ABS suicide  
16  
17 database in this study.  
18  
19

20  
21 Recommendations on future research and public interventions can be proposed based on the  
22  
23 results of this study. Firstly, more details (e.g., health and financial status, alcohol and drugs  
24  
25 use, and family conflicts history) of suicide victims need to be acquired to help public health  
26  
27 policy makers and health workers to design and implement suicide control and prevention  
28  
29 strategies targeting particular population groups (e.g., male young adults) and areas (e.g.,  
30  
31 Indigenous communities). Suicide by firearms is still significant especially in rural and  
32  
33 remote areas. Thus effectiveness of control and prevention strategies e.g., firearm and  
34  
35 pesticide restrictions,<sup>49 50</sup> need to be evaluated. Gatekeeper education and training on rural  
36  
37 general practitioners are necessary in increasing their capacity of identifying local vulnerable  
38  
39 population and suicidal behaviours to reduce potential suicide risk. Education of primary  
40  
41 health workers and the general population are vital in reducing suicidal behaviours,<sup>51-54</sup> and  
42  
43 effectiveness of health education programs needs to be assessed locally. These activities  
44  
45 should be explored at a local level, especially in high risk areas and population groups, to  
46  
47 assess and improve the effectiveness of suicide prevention programs. Socioeconomic  
48  
49 variables (e.g., income and unemployment)<sup>55 56</sup> and environmental factors (e.g., temperature,  
50  
51 rainfall)<sup>57-59</sup> have associations with suicide over time periods. Thus the association of these  
52  
53 factors on suicide over spaces should also be addressed by time series analysis (e.g., in capital  
54  
55  
56  
57  
58  
59  
60

1  
2  
3 cities which contains a certain number of suicide cases every month) and spatial modelling  
4  
5 analysis. As suicide is a complex issue, cross-sectional and multi-disciplinary approaches  
6  
7 need to be implemented in suicide control and prevention in different levels (e.g., national,  
8  
9 state and local). In conclusion, this study has explored patterns of suicide across population  
10  
11 groups and by suicide methods over time and space. These results may have significant  
12  
13 implication for developing national suicide prevention strategies through focusing on high  
14  
15 risk population groups, local areas and specific suicide methods.  
16  
17

### 18 19 **Contributorship statement**

20  
21 Xin Qi designed the study, implemented all statistical analyses and drafted the manuscript.  
22  
23 Shilu Tong conceptualised the idea and revised the study protocol, especially the research  
24  
25 design and data analysis. Wenbiao Hu provided advice on statistical analyses and  
26  
27 interpretation of the results. Andrew Page helped interpreting the results and drafting the  
28  
29 manuscript. All the authors contributed to the preparation of the final manuscript and  
30  
31 approved the submission.  
32  
33  
34

### 35 36 **Competing interests**

37  
38  
39 We declare that we have no competing interests.  
40  
41

### 42 43 **Funding**

44  
45 Xin Qi was funded by the QUT Postgraduate Research Award Scholarship, and Shilu Tong  
46  
47 was supported by a NHMRC Research Fellowship (#553043). We also thank Prof. Richard  
48  
49 from University of New South Wales for providing the suicide data, Dr. Lyle Turner from  
50  
51 Monash University for his comments on the manuscript.  
52  
53

### 54 55 **Data sharing**

56  
57 No additional data available  
58  
59  
60

## Reference

- 1 World Health Organization (2012) Suicide prevention (SUPRE). Available: [http://www.who.int/mental\\_health/prevention/suicide/suicideprevent/en/index.html](http://www.who.int/mental_health/prevention/suicide/suicideprevent/en/index.html) (Assessed 08 September 2012)
- 2 Bando DH, Brunoni AR, Benseñor IM, *et al.* Suicide rates and income in São Paulo and Brazil: a temporal and spatial epidemiologic analysis from 1996 to 2008. *BMC Psychiatry* 2012;12:127.
- 3 Phillips MR, Li X, Zhang Y. Suicide rates in China, 1995-99. *Lancet* 2002;359:835–840.
- 4 Patel V, Ramasundarahettige C, Vijayakumar L, *et al.* Suicide mortality in India: a nationally representative survey. *Lancet* 2012;379:2343–2351.
- 5 Pridemore WA, Spivak AL. Patterns of suicide mortality in Russia. *Suicide Life Threat Behav* 2003;33:132–150.
- 6 Chang SS, Sterne JA, Wheeler BW, *et al.* Geography of suicide in Taiwan: spatial patterning and socioeconomic correlates. *Health Place* 2011;17:641–650.
- 7 Gunnell D, Wheeler B, Chang SS, *et al.* Changes in the geography of suicide in young men: England and Wales 1981--2005. *J Epidemiol Community Health* 2012;66:536–543.
- 8 Miller M, Azrael D, Barber C. Suicide mortality in the United States: the importance of attending to method in understanding population-level disparities in the burden of suicide. *Annu Rev Public Health* 2012;33:393–408.
- 9 ABS. 3309.0 *Suicides, Australia, 1921 to 1998*. Australian Bureau of Statistics, Canberra, Australia, 2000.
- 10 ABS. 3309.0. *Suicides, Australia, 2005*. Australian Bureau of Statistics, Canberra, Australia, 2007.
- 11 ABS. 3309.0. *Suicides, Australia, 2010*. Australian Bureau of Statistics, Canberra, Australia, 2012.
- 12 Spittal MJ, Pirkis J, Miller M, *et al.* Declines in the lethality of suicide attempts explain the decline in suicide deaths in Australia. *PLOS One* 2012;7:e44565.

- 1  
2  
3 13 Large MM, Nielssen OB. Suicide in Australia: meta-analysis of rates and methods of  
4 suicide between 1988 and 2007. *Med J Aust* 2010;192:432–437.  
5  
6  
7 14 Qi X, Hu W, Page A, Tong S. Spatial clusters of suicide in Australia. *BMC Psychiatry*,  
8 2012;12:86.  
9  
10  
11 15 Cheung YT, Spittal MJ, Pirkis J, *et al*. Spatial analysis of suicide mortality in Australia:  
12 investigation of metropolitan-rural-remote differentials of suicide risk across states/territories.  
13 *Soc Sci Med* 2012;75:1460–1468.  
14  
15  
16  
17 16 Wilkinson D, Hiller J, Moss J, *et al*. Mortality variation across Australia: descriptive data  
18 for states and territories, and statistical divisions. *Aust N Z J Public Health*, 2000;24:226-233.  
19  
20  
21 17 Burnley IH. Differential and spatial aspects of suicide mortality in New South Wales and  
22 Sydney, 1980 to 1991. *Aust J Public Health*, 1994;18:293-304.  
23  
24  
25 18 WHO. *International Classification of Diseases, 9th revision (ICD-9)*. Geneva: World  
26 Health Organization, 1975.  
27  
28  
29 19 WHO. *The ICD-10 classification of mental and behavioral disorders*. Geneva: World  
30 Health Organization, 1992.  
31  
32  
33 20 MapInfo Corporation. *MapInfo Professional 10.5 User Guide*. MapInfo Corporation, New  
34 York, United States of America, 2010.  
35  
36  
37 21 Arbuckle JL. *IBM SPSS Amos 21 User's Guide*. IBM Corporation North Castle Drive  
38 Armonk, NY 10504-1785 United States of America, 2012.  
39  
40  
41 22 Loboprabhu S, Molinari V. Severe loneliness in community-dwelling aging adults with  
42 mental illness. *J Psychiatr Pract* 2012;18:20–28.  
43  
44  
45 23 Bekhet AK, Zauszniewski JA. Mental health of elders in retirement communities: is  
46 loneliness a key factor? *Arch Psychiatr Nurs* 2012;26:214–224.  
47  
48  
49 24 Pearson JL, Conwell Y, Lindsay J, *et al*. Elderly suicide: A multi-national view. *Aging*  
50 *Ment Health* 1997;1:107-111.  
51  
52  
53  
54 25 Hall WD, Mant A, Mitchell PB, *et al*. Association between antidepressant prescribing and  
55 suicide in Australia, 1991–2000: trend analysis. *BMJ* 2003;326:1008.  
56  
57  
58  
59  
60



- 1  
2  
3 26 Hickie IB, Davenport TA, Naismith SL, *et al.* Treatment of common mental disorders in  
4 Australian general practice. *Med J Aust* 2001;175 Suppl:S25–30.  
5  
6  
7 27 Mackay FR, Dunn NR, Martin RM, *et al.* Newer antidepressants: a comparison of  
8 tolerability in general practice. *Br J Gen Pract* 1999;49:892–896.  
9  
10  
11 28 Preskorn SH. Antidepressant drug selection: criteria and options. *J Clin Psychiatry*  
12 1994;55 Suppl A:6–22.  
13  
14  
15 29 Mojtabai R. The public health impact of antidepressants: an instrumental variable analysis.  
16 *J Affect Disord* 2011;134:188–197.  
17  
18  
19 30 Friedman RA, Leon AC. Expanding the black box - depression, antidepressants, and the  
20 risk of suicide. *N Engl J Med* 2007;356:2343–2346.  
21  
22  
23 31 Ozanne-Smith J, Ashby K, Newstead S, *et al.* Firearm related deaths: the impact of  
24 regulatory reform. *Inj Prev* 2004;10:280–286.  
25  
26  
27 32 Norberry J, Woolner D, Magarey K. *After Port Arthur - Issues of Gun Control in*  
28 *Australia*. Parliamentary Library Current Issues Brief 16, 1995-96. Department of the  
29 Parliamentary Library, Canberra, Australia, 1996.  
30  
31  
32 33 AMPC. *Australasian Police Ministers' Council (APMC), Special Firearms Meeting,*  
33 *Canberra, 10 May 1996: Resolutions*. Canberra, Australia, 1996.  
34  
35  
36 34 The Library of Congress. Firearms-Control Legislation and Policy: Australia. Available at:  
37 <http://www.loc.gov/law/help/firearms-control/australia.php#Firearms> (Accessed 15 May  
38 2014).  
39  
40  
41 35 Klieve H, Barnes M, De Leo D. Controlling firearms use in Australia: has the 1996 gun  
42 law reform produced the decrease in rates of suicide with this method? *Soc Psychiatry*  
43 *Psychiatr Epidemiol* 2009;44:285–292.  
44  
45  
46 36 McPhedran S, Baker J. Suicide prevention and method restriction: evaluating the impact of  
47 limiting access to lethal means among young Australians. *Arch Suicide Res* 2012;16:135–146.  
48  
49  
50 37 Cent.Dis. Control Prev. Compressed mortality file (underlying cause-of-death). Wide-  
51 Ranging Online Data for Epidemiologic Research (WONDER) database, 2010. Available:  
52 <http://wonder.cdc.gov/mortSQL.html> (Assessed 08 September 2012).  
53  
54  
55  
56  
57  
58  
59  
60

1  
2  
3 38 Stark C, Hopkins P, Gibbs D, *et al.* Trends in suicide in Scotland 1981-1999: age, method  
4 and geography. *BMC Public Health* 2004;4:49.

5  
6  
7 39 Wilkinson D, Gunnell D. Comparison of trends in method-specific suicide rates in  
8 Australia and England & Wales, 1968-97. *Aust N Z J Public Health* 2000;24:153-157.

9  
10  
11 40 Hunter E, Reser J, Baird M, *et al.* *An analysis of suicide in Indigenous communities in*  
12 *North Queensland. The historical cultural and symbolic landscape.* Commonwealth  
13 Department of Health and Aged Care, Australia, 1999.

14  
15  
16  
17 41 Austin AE, van den Heuvel C, Byard RW. Causes of community suicides among  
18 indigenous South Australians. *J Forensic Leg Med* 2011;18:299-301.

19  
20  
21 42 Tse R, Sims N, Byard RW. Alcohol ingestion and age of death in hanging suicides. *J*  
22 *Forensic Sci* 2011;56:922-924.

23  
24  
25 43 Cantor CH, Baume P. Access to methods of suicide. What impact? *Aust N Z J Psychiatry*  
26 1998;32:8-14.

27  
28  
29 44 Beautrais A. Risk factors for suicide and attempted suicide among young people. *Aust N Z*  
30 *J Psychiatry* 2000;34:420-436.

31  
32  
33 45 De Leo D, Svetcic J, Milner A, *et al.* *Suicide in Indigenous populations of Queensland.*  
34 Australian Academic Press, Bowen Hills, Queensland, Australia, 2011.

35  
36  
37 46 Parker R, Ben-Tovim DI. A study of factors affecting suicide in Aboriginal and 'other'  
38 populations in the Top End of the Northern Territory through an audit of coronial records.  
39 *Aust N Z J Psychiatry* 2002;36:404-410.

40  
41  
42 47 Williams R, Doessel D, Svetcic J, *et al.* Accuracy of official suicide mortality data in  
43 Queensland. *Aust N Z J Psychiatry* 2010;44:815-822.

44  
45  
46 48 ABS. 3303.0. *Causes of death, Australia, 2007.* Australian Bureau of Statistics, Canberra,  
47 Australia, 2009.

48  
49  
50 49 Lester D, Leenaars A. Suicide rates in Canada before and after tightening firearm control  
51 laws. *Psychol Rep* 1993;72:787-790.

52  
53  
54 50 Ludwig J, Cook PJ. Homicide and suicide rates associated with implementation of the  
55 Brady Handgun Violence Prevention Act. *JAMA* 2000;284:585-591.

- 1  
2  
3 51 Rihmer Z, Belso N, Kalmar S. Antidepressants and suicide prevention in Hungary. *Acta*  
4 *Psychiatr Scand* 2001;103:238–239.  
5  
6  
7 52 Jorm AF, Christensen H, Griffiths KM. The impact of beyond blue: the national  
8 depression initiative on the Australian public's recognition of depression and beliefs about  
9 treatments. *Aust N Z J Psychiatry* 2005;39:248–254.  
10  
11  
12 53 Paykel ES, Hart D, Priest RG. Changes in public attitudes to depression during the Defeat  
13 Depression Campaign. *Br J Psychiatry* 1998;173:519–522.  
14  
15  
16 54 Mann JJ, Apter A, Bertolote J, *et al*. Suicide prevention strategies: a systematic review.  
17 *JAMA* 2005;294:2064–2074.  
18  
19  
20 55 Huisman M, Oldehinkel AJ. Income inequality, social capital and self-inflicted injury and  
21 violence-related mortality. *J Epidemiol Community Health* 2009;63:31–37.  
22  
23  
24 56 Chan WS, Yip PS, Wong PW, *et al*. Suicide and unemployment: what are the missing  
25 links? *Arch Suicide Res* 2007;11:327–335.  
26  
27  
28 57 Lambert G, Reid C, Kaye D, *et al*. Increased suicide rate in the middle-aged and its  
29 association with hours of sunlight. *Am J Psychiatry* 2003;160:793–795.  
30  
31  
32 58 Nicholls N, Butler CD, Hanigan I. Inter-annual rainfall variations and suicide in New  
33 South Wales, Australia, 1964–2001. *Int J Biometeorol* 2006;50:139–143.  
34  
35  
36 59 Fragar LJ, Gray EJ, Franklin RJ, *et al*. *A picture of health: a preliminary report of the*  
37 *health of country Australians*. The Australian Agricultural Health Unit, P.O. Box 256, Moree,  
38 NSW 2400, Australia, 1997.  
39  
40  
41  
42  
43  
44  
45  
46  
47  
48  
49  
50  
51  
52  
53  
54  
55  
56  
57  
58  
59  
60

Table 1: Suicide deaths and rate (per 100,000) across different groups in Australia (1986-2005)

| Population group                | Age group |       |                     | 35 to 54 |       |                   | 55 to 74 |       |                   | 75 & over |       |                   | All ages |       |                   |
|---------------------------------|-----------|-------|---------------------|----------|-------|-------------------|----------|-------|-------------------|-----------|-------|-------------------|----------|-------|-------------------|
|                                 | 15 to 34  |       |                     | Cases    | Rate  | Rate Ratio        | Cases    | Rate  | Rate Ratio        | Cases     | Rate  | Rate Ratio        | Cases    | Rate  | Rate Ratio        |
|                                 | Cases     | Rate  | Rate Ratio (95% CI) |          |       | (95% CI)          |          |       | (95% CI)          |           |       | (95% CI)          |          |       | (95% CI)          |
| <b>By sex</b>                   |           |       |                     |          |       |                   |          |       |                   |           |       |                   |          |       |                   |
| Male                            | 15,059    | 28.29 | 2.23 (2.19, 2.27)   | 12,672   | 25.61 | 2.02 (1.98, 2.06) | 5,986    | 22.35 | 1.77 (1.72, 1.81) | 2,091     | 30.98 | 2.45 (2.34, 2.56) | 35,942   | 20.32 | 1.61 (1.58, 1.63) |
| Female                          | 3,242     | 6.12  | 0.48 (0.47, 0.50)   | 3,556    | 7.14  | 0.56 (0.55, 0.58) | 1,818    | 6.48  | 0.51 (0.49, 0.54) | 682       | 6.14  | 0.49 (0.45, 0.52) | 9,351    | 5.17  | 0.41 (0.40, 0.42) |
| <b>By region</b>                |           |       |                     |          |       |                   |          |       |                   |           |       |                   |          |       |                   |
| Capital cities                  | 11,267    | 16.28 | 1.29 (1.26, 1.31)   | 9,736    | 15.68 | 1.24 (1.21, 1.27) | 4,568    | 14.21 | 1.12 (1.09, 1.16) | 1,674     | 15.45 | 1.22 (1.16, 1.28) | 27,332   | 12.32 | 0.97 (0.96, 0.99) |
| Regional centres                | 3,423     | 17.57 | 1.39 (1.34, 1.44)   | 3,269    | 17.72 | 1.40 (1.35, 1.45) | 1,550    | 13.65 | 1.03 (1.03, 1.14) | 584       | 15.96 | 1.26 (1.16, 1.37) | 8,869    | 12.86 | 1.02 (1.00, 1.04) |
| Rural & remote areas            | 3,611     | 20.58 | 1.63 (1.57, 1.68)   | 3,223    | 17.23 | 1.36 (1.31, 1.41) | 1,686    | 14.88 | 1.18 (1.12, 1.23) | 515       | 15.37 | 1.21 (1.11, 1.32) | 9,092    | 13.55 | 1.07 (1.05, 1.09) |
| <b>By methods</b>               |           |       |                     |          |       |                   |          |       |                   |           |       |                   |          |       |                   |
| Firearms & other explosives     | 2,795     | 2.63  | 0.21 (0.20, 0.22)   | 2,285    | 2.30  | 0.18 (0.18, 0.19) | 1,674    | 3.05  | 0.24 (0.23, 0.25) | 556       | 3.11  | 0.25 (0.23, 0.27) | 7,348    | 2.07  | 0.16 (0.16, 0.17) |
| Gases & vapours                 | 3,457     | 3.25  | 0.26 (0.25, 0.27)   | 4,104    | 4.13  | 0.33 (0.32, 0.34) | 1,277    | 2.33  | 0.18 (0.17, 0.20) | 375       | 2.10  | 0.17 (0.15, 0.18) | 9,214    | 2.60  | 0.20 (0.20, 0.21) |
| Hanging                         | 7,366     | 6.93  | 0.55 (0.54, 0.56)   | 4,927    | 4.96  | 0.39 (0.38, 0.41) | 2,301    | 4.20  | 0.33 (0.32, 0.35) | 901       | 5.05  | 0.40 (0.37, 0.43) | 15,620   | 4.40  | 0.35 (0.34, 0.35) |
| Solid or liquid substances      | 2,166     | 2.04  | 0.16 (0.16, 0.17)   | 2,863    | 2.88  | 0.23 (0.22, 0.24) | 1,333    | 2.43  | 0.19 (0.18, 0.20) | 434       | 2.43  | 0.19 (0.18, 0.21) | 6,807    | 1.92  | 0.15 (0.15, 0.15) |
| Other                           | 2,517     | 1.26  | 0.19 (0.18, 0.20)   | 2,049    | 2.06  | 0.16 (0.16, 0.17) | 1,219    | 2.22  | 0.18 (0.17, 0.19) | 507       | 2.84  | 0.23 (0.21, 0.25) | 6,294    | 1.78  | 0.14 (0.14, 0.14) |
| <b>By region and by sex</b>     |           |       |                     |          |       |                   |          |       |                   |           |       |                   |          |       |                   |
| <b>Male</b>                     |           |       |                     |          |       |                   |          |       |                   |           |       |                   |          |       |                   |
| Capital cities                  | 9,072     | 26.66 | 2.08 (2.03, 2.13)   | 7,439    | 24.59 | 1.92 (1.87, 1.97) | 3,358    | 21.86 | 1.71 (1.65, 1.77) | 1,179     | 30.02 | 2.35 (2.22, 2.49) | 21,107   | 19.63 | 1.53 (1.51, 1.56) |
| Regional centres                | 2,868     | 29.90 | 2.33 (2.25, 2.42)   | 2,593    | 28.60 | 2.23 (2.15, 2.32) | 1,213    | 22.21 | 1.74 (1.64, 1.84) | 468       | 32.80 | 2.57 (2.35, 2.81) | 7,173    | 21.39 | 1.67 (1.63, 1.71) |
| Rural/remote areas              | 3,119     | 32.46 | 2.72 (2.62, 2.82)   | 2,640    | 25.99 | 2.16 (2.08, 2.24) | 1,415    | 23.73 | 1.94 (1.84, 2.04) | 444       | 31.82 | 2.60 (2.37, 2.85) | 7,662    | 21.39 | 1.77 (1.73, 1.82) |
| <b>Female</b>                   |           |       |                     |          |       |                   |          |       |                   |           |       |                   |          |       |                   |
| Capital cities                  | 2,195     | 6.40  | 0.50 (0.48, 0.52)   | 2,297    | 7.39  | 0.58 (0.55, 0.60) | 1,210    | 7.33  | 0.57 (0.54, 0.61) | 495       | 7.26  | 0.57 (0.52, 0.62) | 6,225    | 5.58  | 0.44 (0.42, 0.45) |
| Regional centres                | 555       | 5.75  | 0.45 (0.42, 0.49)   | 676      | 7.37  | 0.58 (0.53, 0.62) | 337      | 5.83  | 0.46 (0.41, 0.51) | 116       | 5.27  | 0.41 (0.34, 0.50) | 1,696    | 4.91  | 0.38 (0.37, 0.40) |
| Rural/remote areas              | 492       | 5.43  | 0.43 (0.39, 0.47)   | 583      | 6.12  | 0.51 (0.47, 0.55) | 271      | 4.71  | 0.39 (0.34, 0.43) | 71        | 3.41  | 0.28 (0.22, 0.35) | 1,430    | 4.13  | 0.34 (0.33, 0.36) |
| <b>By methods and by region</b> |           |       |                     |          |       |                   |          |       |                   |           |       |                   |          |       |                   |
| <b>Capital cities</b>           |           |       |                     |          |       |                   |          |       |                   |           |       |                   |          |       |                   |
| Firearms & other explosives     | 1,148     | 1.66  | 0.13 (0.12, 0.14)   | 913      | 1.47  | 0.12 (0.11, 0.12) | 626      | 1.95  | 0.15 (0.14, 0.17) | 211       | 1.95  | 0.16 (0.14, 0.18) | 2,908    | 1.31  | 0.10 (0.10, 0.11) |
| Gases & vapours                 | 2,299     | 3.32  | 0.26 (0.25, 0.27)   | 2,420    | 3.90  | 0.31 (0.30, 0.32) | 732      | 2.28  | 0.18 (0.17, 0.19) | 222       | 2.05  | 0.16 (0.14, 0.19) | 5,674    | 2.56  | 0.20 (0.20, 0.21) |
| Hanging                         | 4,339     | 6.27  | 0.50 (0.48, 0.51)   | 3,017    | 4.86  | 0.38 (0.37, 0.40) | 1,470    | 4.57  | 0.36 (0.34, 0.38) | 591       | 5.45  | 0.43 (0.40, 0.47) | 9,478    | 4.27  | 0.30 (0.30, 0.31) |
| Solid or liquid substances      | 1,547     | 2.24  | 0.18 (0.17, 0.19)   | 1,864    | 3.00  | 0.24 (0.23, 0.25) | 901      | 2.80  | 0.22 (0.21, 0.24) | 284       | 2.62  | 0.21 (0.19, 0.23) | 4,600    | 2.07  | 0.16 (0.16, 0.17) |
| Other                           | 1,934     | 2.79  | 0.22 (0.21, 0.23)   | 1,522    | 2.45  | 0.19 (0.18, 0.20) | 839      | 2.61  | 0.21 (0.19, 0.22) | 366       | 3.38  | 0.27 (0.24, 0.30) | 4,672    | 2.11  | 0.17 (0.16, 0.17) |
| <b>Regional centres</b>         |           |       |                     |          |       |                   |          |       |                   |           |       |                   |          |       |                   |
| Firearms & other explosives     | 603       | 3.09  | 0.25 (0.23, 0.27)   | 495      | 2.68  | 0.21 (0.20, 0.23) | 368      | 3.24  | 0.26 (0.23, 0.28) | 131       | 3.58  | 0.28 (0.24, 0.33) | 1,606    | 2.33  | 0.19 (0.18, 0.19) |
| Gases & vapours                 | 631       | 3.24  | 0.26 (0.24, 0.28)   | 861      | 4.67  | 0.37 (0.35, 0.40) | 275      | 2.42  | 0.19 (0.17, 0.22) | 91        | 2.49  | 0.20 (0.16, 0.24) | 1,858    | 2.70  | 0.21 (0.20, 0.22) |
| Hanging                         | 1,502     | 7.71  | 0.61 (0.58, 0.64)   | 1,026    | 5.56  | 0.44 (0.41, 0.47) | 456      | 4.02  | 0.32 (0.29, 0.35) | 187       | 5.11  | 0.40 (0.35, 0.46) | 3,200    | 4.65  | 0.37 (0.36, 0.38) |
| Solid or liquid substances      | 344       | 1.77  | 0.14 (0.13, 0.16)   | 570      | 3.09  | 0.25 (0.23, 0.27) | 258      | 2.27  | 0.18 (0.16, 0.20) | 92        | 2.51  | 0.20 (0.16, 0.24) | 1,268    | 1.84  | 0.15 (0.14, 0.15) |
| Other                           | 343       | 1.76  | 0.14 (0.13, 0.16)   | 317      | 1.72  | 0.14 (0.12, 0.15) | 193      | 1.70  | 0.14 (0.12, 0.16) | 83        | 2.27  | 0.18 (0.15, 0.22) | 937      | 1.36  | 0.11 (0.10, 0.12) |

Table 1: Suicide deaths and rate (per 100,000) across different groups in Australia (1986-2005, continued)

| Population group             | Age group     |              |                          | 35 to 54      |              |                          | 55 to 74     |              |                          | 75 & over    |              |                          | All ages      |              |                     |
|------------------------------|---------------|--------------|--------------------------|---------------|--------------|--------------------------|--------------|--------------|--------------------------|--------------|--------------|--------------------------|---------------|--------------|---------------------|
|                              | Cases         | Rate         | Rate Ratio (95% CI)      | Cases         | Rate         | Rate Ratio (95% CI)      | Cases        | Rate         | Rate Ratio (95% CI)      | Cases        | Rate         | Rate Ratio (95% CI)      | Cases         | Rate         | Rate Ratio (95% CI) |
| Rural/remote areas           |               |              |                          |               |              |                          |              |              |                          |              |              |                          |               |              |                     |
| Firearms & other explosives  | 1,044         | 5.95         | 0.47 (0.44, 0.50)        | 877           | 4.69         | 0.37 (0.35, 0.40)        | 680          | 6.00         | 0.48 (0.44, 0.51)        | 214          | 6.39         | 0.51 (0.44, 0.52)        | 2,834         | 4.22         | 0.33 (0.32, 0.35)   |
| Gases & vapours              | 527           | 3.00         | 0.24 (0.22, 0.26)        | 823           | 4.40         | 0.35 (0.33, 0.37)        | 270          | 2.38         | 0.19 (0.17, 0.21)        | 62           | 1.85         | 0.15 (0.11, 0.19)        | 1,682         | 2.51         | 0.20 (0.19, 0.21)   |
| Hanging                      | 1,525         | 8.69         | 0.69 (0.65, 0.72)        | 884           | 4.73         | 0.37 (0.35, 0.40)        | 375          | 3.31         | 0.26 (0.24, 0.29)        | 123          | 3.67         | 0.29 (0.24, 0.35)        | 2,942         | 4.38         | 0.35 (0.33, 0.36)   |
| Solid or liquid substances   | 275           | 1.57         | 0.12 (0.11, 0.14)        | 429           | 2.29         | 0.18 (0.17, 0.20)        | 174          | 1.54         | 0.12 (0.11, 0.14)        | 58           | 1.73         | 0.14 (0.11, 0.18)        | 939           | 1.40         | 0.11 (0.10, 0.12)   |
| Other                        | 240           | 1.37         | 0.11 (0.10, 0.12)        | 210           | 1.12         | 0.09 (0.08, 0.10)        | 187          | 1.65         | 0.13 (0.11, 0.15)        | 58           | 1.73         | 0.14 (0.11, 0.18)        | 695           | 1.04         | 0.08 (0.08, 0.09)   |
| <b>By methods and by sex</b> |               |              |                          |               |              |                          |              |              |                          |              |              |                          |               |              |                     |
| <b>Male</b>                  |               |              |                          |               |              |                          |              |              |                          |              |              |                          |               |              |                     |
| Firearms & other explosives  | 2,555         | 4.80         | 0.38 (0.37, 0.40)        | 2,123         | 4.29         | 0.34 (0.33, 0.36)        | 1,605        | 5.99         | 0.48 (0.45, 0.50)        | 551          | 8.16         | 0.65 (0.60, 0.70)        | 6,869         | 3.88         | 0.31 (0.30, 0.32)   |
| Gases & vapours              | 2,961         | 5.56         | 0.44 (0.42, 0.46)        | 3,428         | 6.93         | 0.55 (0.53, 0.57)        | 1,091        | 4.07         | 0.32 (0.30, 0.34)        | 324          | 4.80         | 0.38 (0.34, 0.43)        | 7,805         | 4.41         | 0.35 (0.34, 0.36)   |
| Hanging                      | 6,267         | 11.77        | 0.93 (0.91, 0.96)        | 4,115         | 8.32         | 0.66 (0.64, 0.68)        | 1,821        | 6.80         | 0.54 (0.51, 0.56)        | 670          | 9.93         | 0.79 (0.73, 0.85)        | 12,963        | 7.33         | 0.58 (0.57, 0.59)   |
| Solid or liquid substances   | 1,301         | 2.44         | 0.19 (0.18, 0.20)        | 1,573         | 3.18         | 0.25 (0.24, 0.27)        | 671          | 2.51         | 0.20 (0.18, 0.21)        | 198          | 2.93         | 0.23 (0.20, 0.27)        | 3,746         | 2.12         | 0.17 (0.16, 0.17)   |
| Other                        | 1,975         | 3.72         | 0.29 (0.28, 0.31)        | 1,433         | 2.89         | 0.23 (0.22, 0.24)        | 798          | 2.98         | 0.24 (0.22, 0.25)        | 348          | 5.16         | 0.41 (0.37, 0.46)        | 4,559         | 2.58         | 0.20 (0.20, 0.21)   |
| <b>Female</b>                |               |              |                          |               |              |                          |              |              |                          |              |              |                          |               |              |                     |
| Firearms & other explosives  | 240           | 0.45         | 0.04 (0.03, 0.04)        | 162           | 0.33         | 0.03 (0.02, 0.03)        | 69           | 0.25         | 0.02 (0.02, 0.03)        | 5            | 0.05         | 0.00 (0.00, 0.01)        | 479           | 0.26         | 0.02 (0.02, 0.02)   |
| Gases & vapours              | 496           | 0.94         | 0.07 (0.07, 0.08)        | 676           | 1.36         | 0.11 (0.10, 0.12)        | 186          | 0.66         | 0.05 (0.05, 0.06)        | 51           | 0.46         | 0.04 (0.03, 0.05)        | 1,409         | 0.78         | 0.06 (0.06, 0.07)   |
| Hanging                      | 1,099         | 2.07         | 0.16 (0.15, 0.17)        | 812           | 1.63         | 0.12 (0.11, 0.13)        | 480          | 1.71         | 0.14 (0.12, 0.15)        | 231          | 2.08         | 0.17 (0.15, 0.19)        | 2,657         | 1.47         | 0.12 (0.11, 0.12)   |
| Solid or liquid substances   | 865           | 1.63         | 0.13 (0.12, 0.14)        | 1,290         | 2.59         | 0.21 (0.19, 0.22)        | 662          | 2.36         | 0.19 (0.17, 0.20)        | 236          | 2.13         | 0.17 (0.15, 0.19)        | 3,061         | 1.69         | 0.13 (0.13, 0.14)   |
| Other                        | 542           | 1.03         | 0.08 (0.07, 0.09)        | 616           | 1.23         | 0.10 (0.09, 0.11)        | 421          | 1.50         | 0.12 (0.11, 0.13)        | 163          | 1.42         | 0.12 (0.10, 0.14)        | 1,745         | 0.97         | 0.08 (0.07, 0.08)   |
| <b>Total suicide</b>         | <b>18,301</b> | <b>17.23</b> | <b>1.36 (1.34, 1.38)</b> | <b>16,228</b> | <b>16.35</b> | <b>1.29 (1.27, 1.32)</b> | <b>7,804</b> | <b>14.23</b> | <b>1.12 (1.10, 1.15)</b> | <b>2,773</b> | <b>15.54</b> | <b>1.23 (1.18, 1.28)</b> | <b>45,293</b> | <b>12.66</b> |                     |

Note: population size (all and by groups) was based on the mean value of Australian population census (1986, 1991, 1996, 2001, 2006). Reference group: annual average of total suicide in Australia between 1986 and 2005 after adjusting for population changes over years.

Table 2: Suicide rate change over time (population groups and suicide methods)

|                            | RR   | 95% CI     | P-value |
|----------------------------|------|------------|---------|
| All suicide                | 0.99 | 0.99, 0.99 | <0.001  |
| Male                       | 0.99 | 0.99, 0.99 | <0.001  |
| Female                     | 0.99 | 0.99, 0.99 | <0.001  |
| Age 15-34                  | 0.99 | 0.99, 1.00 | <0.001  |
| Age 35-54                  | 1.00 | 0.99, 1.00 | 0.009   |
| Age 55-74                  | 0.97 | 0.97, 0.98 | <0.001  |
| Age 75 & over              | 0.97 | 0.97, 0.98 | <0.001  |
| Urban areas                | 0.99 | 0.99, 0.99 | 0.001   |
| Regional areas             | 1.00 | 0.99, 1.00 | 0.019   |
| Rural & remote areas       | 1.00 | 0.99, 1.00 | 0.022   |
| Firearm                    | 0.93 | 0.93, 0.94 | <0.001  |
| Hanging                    | 1.04 | 1.03, 1.04 | <0.001  |
| Gas and vapour             | 0.99 | 0.98, 0.99 | <0.001  |
| Solid or liquid substances | 0.97 | 0.96, 0.97 | <0.001  |
| Other methods              | 0.98 | 0.98, 0.98 | <0.001  |

RR: Relative Risk. Reference group: suicide in 1986 for each population group.

Table 3: Male suicide rate by firearms change over time (Reference: mean annual male suicide rate in 1986-1990 by each of age groups and types of regions)

| Population group       | Time period | RR   | 95% CI     | P-value |
|------------------------|-------------|------|------------|---------|
| 15-34 yrs              | 2001-2005   | 0.22 | 0.08, 0.36 | <0.001  |
|                        | 1996-2000   | 0.39 | 0.28, 0.51 | <0.001  |
|                        | 1991-1995   | 0.78 | 0.69, 0.87 | <0.001  |
| 35-54 yrs              | 2001-2005   | 0.39 | 0.26, 0.51 | <0.001  |
|                        | 1996-2000   | 0.52 | 0.40, 0.64 | <0.001  |
|                        | 1991-1995   | 0.83 | 0.72, 0.94 | 0.001   |
| 55-74 yrs              | 2001-2005   | 0.43 | 0.28, 0.57 | <0.001  |
|                        | 1996-2000   | 0.63 | 0.49, 0.76 | <0.001  |
|                        | 1991-1995   | 0.88 | 0.75, 1.01 | 0.049   |
| 75 yrs & over          | 2001-2005   | 0.45 | 0.21, 0.69 | <0.001  |
|                        | 1996-2000   | 0.66 | 0.43, 0.89 | <0.001  |
|                        | 1991-1995   | 0.83 | 0.59, 1.06 | 0.103   |
| Capital cities         | 2001-2005   | 0.33 | 0.21, 0.45 | <0.001  |
|                        | 1996-2000   | 0.46 | 0.35, 0.57 | <0.001  |
|                        | 1991-1995   | 0.78 | 0.69, 0.88 | <0.001  |
| Regional centres       | 2001-2005   | 0.32 | 0.17, 0.48 | <0.001  |
|                        | 1996-2000   | 0.47 | 0.33, 0.61 | <0.001  |
|                        | 1991-1995   | 0.78 | 0.65, 0.90 | <0.001  |
| Rural and remote areas | 2001-2005   | 0.41 | 0.29, 0.53 | <0.001  |
|                        | 1996-2000   | 0.61 | 0.50, 0.72 | <0.001  |
|                        | 1991-1995   | 0.91 | 0.81, 1.00 | 0.048   |

1  
2  
3 Figure 1: suicide rates over time and sub-groups (per 100,000)

4 A: Sex and age groups; B: Sex and urban rural differences; C: Sex and methods;

5  
6  
7 Figure 2: suicide rates over time and methods (per 100,000, annual average)

8 A: Methods and age groups: B: Methods and urban rural difference

9  
10  
11 Figure 3: Suicide rates among different groups across Australia (1986-2005)

12  
13  
14 Figure 4: Suicide rates by self-harm over time and across space in Australia (1986-2005)

15  
16  
17  
18  
19 Supplemental 1: Time trend of suicide rates by methods, sexes, age groups and urban/rural  
20 areas (part 1).

21 Supplemental 2: Time trend of suicide rates by methods, sexes, age groups and urban/rural  
22 areas (part 2).  
23  
24  
25  
26  
27  
28  
29  
30  
31  
32  
33  
34  
35  
36  
37  
38  
39  
40  
41  
42  
43  
44  
45  
46  
47  
48  
49  
50  
51  
52  
53  
54  
55  
56  
57  
58  
59  
60



# Dynamic pattern of suicide in Australia, 1986–2005

## Author details

Xin Qi<sup>1,2</sup>, Wenbiao Hu<sup>2</sup>, Andrew Page<sup>3</sup>, Shilu Tong<sup>2</sup>

1. Xi'an Jiaotong University, China

2. Queensland University of Technology, Australia

3. University of Western Sydney, Australia

Dr. Xin Qi, School of Public Health, Xi'an Jiaotong University, 76 Yanta Xilu, Xi'an, Shaanxi 710061, China; School of Public Health and Social Work, Queensland University of Technology, Kelvin Grove, QLD, 4059, Australia

Tel: +86 188 2944 7238; Email: [chester.qi@yahoo.com](mailto:chester.qi@yahoo.com)

Dr. Wenbiao Hu, School of Public Health and Social Work, Queensland University of Technology, Kelvin Grove, QLD, 4059, Australia

Tel: +61 7 3138 5724; Email: [w2.hu@qut.edu.au](mailto:w2.hu@qut.edu.au)

Prof. Andrew Page, School of Science and Health, University of Western Sydney, Building 24, Room 4.53D, Campbelltown Campus, Locked Bag, 1797, Penrith NSW 2517, Australia

Tel: +61 2 4620 3537; Fax: +61 2 4620 3792; Email: [a.page@uws.edu.au](mailto:a.page@uws.edu.au)

Prof. Shilu Tong, School of Public Health and Social Work, Queensland University of Technology, Kelvin Grove, QLD, 4059, Australia

Tel: +61 7 3138 9745; Fax: +61 7 3138 3369; Email: [s.tong@qut.edu.au](mailto:s.tong@qut.edu.au)

Author for correspondence

Dr. Xin Qi

## ABSTRACT

**Objective:** This study explored the spatiotemporal variations of suicide across Australia from 1986 to 2005, discussed the reasons for dynamic changes and recommended future suicide research and prevention strategies.

**Design:** Suicide (1986–2005) and population data were obtained from the Australian Bureau of Statistics. A series of analyses were conducted to examine the suicide pattern by sex, method and age group over time and space.

**Results:** Apparent differences in suicide rates across sex, age groups and suicide methods were found across different geographical areas. Male suicides were mainly completed by hanging, firearms, gases and poison. Female suicides were primarily completed by hanging and poison. **Suicide rates were high in rural areas than urban areas (capital cities and regional centres).** Suicide rate by firearms was higher in rural areas than urban areas, while the pattern for poison was opposite. Suicide rates slightly fluctuated for total population and aged between 15 and 54, while suicide decreased among 55 years and over during the study period. There was a decrease of suicide by firearms during the study period especially after 1996 when new firearm control law was implemented; while suicide by hanging kept increasing. **Some areas with a high proportion of Indigenous population (e.g., northwest of Queensland and top north of Northern Territory) had a high increase of suicide incidence after 1995.**

**Conclusions:** Suicide rates varied over time and space and across sexes, age groups, suicide methods. Suicide control and prevention strategies should target particular groups and areas of high and increased risk (e.g., Indigenous communities).

**Key words:** suicide, Australia, pattern

## STRENGTHS AND LIMITATIONS OF THE STUDY

1  
2  
3 This study used various **cross-tabulations** with the 20-year Australian national suicide data cut  
4  
5 in different ways (e.g., population group, suicide methods, time and space), and provides  
6  
7 valuable information for examining suicide trends in Australia.  
8

9  
10 The different suicide rates across population groups and by suicide methods were presented,  
11  
12 which may help in designing effective suicide control and prevention programs. Different  
13  
14 levels of spatial scales (**Local Government Area (LGA) and Statistical Local Area (SLA)**)  
15  
16 were combined to best display the spatial distribution of suicide patterns; and the boundary  
17  
18 changes over years were also adjusted using advanced GIS methods.  
19

20  
21 This study only examined the suicide pattern at the population level using aggregated data.  
22  
23 Detailed individual information such as marriage, employment, Indigenous status and health  
24  
25 status before suicide was not available in the current dataset. Thus ecological fallacy in  
26  
27 inevitable in this study and **the results should be cautious when interpreted at the individual**  
28  
29 **level.**  
30  
31

32  
33 The quality of suicide data may influence the results of the study. There is evidence  
34  
35 suggesting that some suicide deaths were not covered in the current ABS database. The real  
36  
37 suicide rate may be underestimated so the results should be interpreted with caution.  
38  
39

40  
41 The suicide database was acquired a few years ago and may not indicate the trend of suicide  
42  
43 after 2005.  
44

## 45 46 **INTRODUCTION**

47  
48  
49 Suicide has long been regarded as a major public health issues globally, with about 1 million  
50  
51 suicide deaths annually.<sup>1</sup> Suicide patterns, including suicide methods, time and geographical  
52  
53 variation have been explored in many countries and regions, such as **Brazil,**<sup>2</sup> **China,**<sup>3</sup> **India,**<sup>4</sup>  
54  
55 **Russia,**<sup>5</sup> **Taiwan,**<sup>6</sup> **United Kingdom,**<sup>7</sup> and United States.<sup>8</sup> In Australia, suicide rates have  
56  
57  
58  
59  
60

1  
2  
3 fluctuated since suicide registration started in the early of 1920s.<sup>9-11</sup> The trend of annual  
4  
5 suicide rate from 1980 to now was relatively stable (around 9 to 10 per 100,000) except for a  
6  
7 peak in 1997 (around 14.6 per 100,000).<sup>9-11</sup> However, there were still around 2,000 suicide  
8  
9 deaths annually, mainly in male adults (25-54 years age). Thus, it is vital to understand the  
10  
11 variations of suicide patterns over time, space, population groups (age, sex and ethnic groups)  
12  
13 and the possible reasons for these variations, in order to design effective suicide control and  
14  
15 prevention programs. Previous reports and studies have explored suicide patterns in Australia  
16  
17 over time,<sup>9-12</sup> methods<sup>13</sup> and space.<sup>14</sup> From geographical aspect, Australian Bureau of  
18  
19 Statistics (ABS) suicide reports covered a long period (1921 to 2010) and targeted at the state  
20  
21 level and capital cities.<sup>9-11</sup> However, suicide patterns at the smaller area (e.g., Local  
22  
23 Government Area, or LGA) level, especially in rural and remote areas, were not provided by  
24  
25 the ABS reports. The study by Cheung et al examined the spatial pattern of suicide in  
26  
27 Australia after 2000.<sup>15</sup> However, this study did not examine suicide pattern before 2000 or by  
28  
29 suicide methods; thus the dynamic spatial pattern of suicide and high risk areas of suicide by  
30  
31 particular method (e.g., firearms) could not be demonstrated. ABS reports indicated that most  
32  
33 suicide occur in urban areas in Australia, while less suicide were recorded in rural and remote  
34  
35 areas covering of most Australian land territory but with a lower population density. Thus it is  
36  
37 vital in selecting suitable spatial scales in examining spatial pattern of suicide in Australia.  
38  
39 The studies of spatial pattern of suicide in earlier years (e.g. before 1995) used relative large  
40  
41 spatial scales (e.g., Statistical Division rather than LGA), which may mask the spatial  
42  
43 variation of suicide in some rural areas (e.g., in Western Australia and Northern Territory) due  
44  
45 to their large size.<sup>16 17</sup> The spatial patterns of suicide by different population groups and  
46  
47 suicide methods over a long term covering both of previous years (e.g., before 2000) and  
48  
49 more recent years (after 2000) using suitable spatial scales (e.g., LGA) have not yet been  
50  
51 examined. The trends of suicide rates over time may differ across population groups (e.g.,  
52  
53 young or older adults) and areas (e.g., suicide by firearms in urban or rural areas). Thus, this  
54  
55  
56  
57  
58  
59  
60

1  
2  
3 study examined long-term (both dynamic and static), spatiotemporal patterns of Australian  
4 national suicide, using a range of different combinations of age, time, method, and location  
5 from the period 1986-2005.  
6  
7  
8

## 9 10 **DESIGN**

### 11 12 13 **Data source**

14  
15  
16 The unit record data of suicide deaths between 1986 and 2005 were acquired from Australian  
17 Bureau of Statistics (ABS), including sex, International Classification of Disease (ICD) Code  
18 (ICD 9: 950.0-959.9; ICD 10: X60-X84)<sup>18 19</sup> relating to suicide or self-inflicted injury, age,  
19 country of birth, date of suicide and Statistical Local Area (SLA) code for place of suicide  
20 occurrence. The application of access to suicide database after 2005 is still under review by  
21 ABS. As SLA boundaries have changed dramatically over the study period, especially in  
22 urban areas, we chose Local Governmental Area (LGA) as the standard geographical unit to  
23 explore the spatial pattern of suicide. Choosing LGA as the spatial scale also aims to keep the  
24 balance of including a certain number of suicide in each geographical unit and avoiding using  
25 too large geographical unit. Each LGA is composed of one or more SLAs and the LGA  
26 boundaries are relatively stable over the study period. The Australian Standard Geographical  
27 Classification (ASGC), updated annually, was used to incorporate SLA codes into LGA  
28 codes, examine and adjust for SLA/LGA boundary changes over time. CDATA 2001, a  
29 product issued by ABS, provided digital boundaries and socio-demographic data of Australia  
30 (including 1991, 1996 and 2001 population census data at SLA/LGA levels, based on 2001  
31 Census boundary) and was applied in MapInfo 10.5 software package for map display.<sup>20</sup>  
32  
33  
34  
35  
36  
37  
38  
39  
40  
41  
42  
43  
44  
45  
46  
47  
48  
49  
50  
51  
52  
53  
54  
55  
56  
57  
58  
59  
60  
Population data (SLA/LGA levels) in 1986 and 2006 Census from ABS were merged with  
2001 Census data after adjustment for boundary changes using ASGC references. The suicide  
rates in different groups over time and across LGAs were then calculated. In this study, we

1  
2  
3 categorize LGAs as three types: metropolitan areas of capital cities, regional centres (other  
4 LGA named as “city” outside of capital cities, e.g., City of Townville), rural and remote areas  
5  
6 (the remaining LGAs).  
7  
8

9  
10 Most areas in South Australia (SA) and Northern Territory (NT) have a very low population  
11 density and were defined as unincorporated areas by ABS at the LGA level, but these areas  
12 were also composed of 27 SLAs according to the 2001 Census data. Thus we applied SLA  
13 data in unincorporated areas in SA and NT to provide more detailed information. In the 2001  
14 Census, Australia was divided into 628 LGAs, plus 27 SLAs in the unincorporated areas of  
15 SA and NT. Ethical approval was granted by the Human Research Ethics Committee,  
16 Queensland University of Technology.  
17  
18  
19  
20  
21  
22  
23  
24

### 25 26 **Statistical analyses** 27

28  
29 Descriptive and mapping approaches were applied to explore the age, sex, method, time and  
30 regional-specific patterns of suicide cases and rates. Firstly, we explored the basic pattern of  
31 suicide among different groups by calculating suicide rates, **Rate Ratio** and 95% Confident  
32 Interval (CI) to annual mean of national suicide rate over the study period **using the annual**  
33 **average suicide number in the whole Australia and population (1986-2005) as reference**  
34 **group**. Then the temporal trends of suicide rates in population groups were examined, using  
35 yearly data and Poisson regression. **Suicide in 1986 and by methods and population groups**  
36 **was the reference group and we used logarithm transferred population size in different years**  
37 **as an offset in Poisson regression. Suicide year was regarded as a covariate.** All the statistical  
38 analyses were implemented by SPSS 21.0.<sup>21</sup> Finally suicide rates at the LGA level were  
39 applied to display suicide rates over sexes, age groups and suicide methods using mapping  
40 approaches by MapInfo 10.5.<sup>20</sup> We used the annual average sex-specific rates for the whole of  
41  
42  
43  
44  
45  
46  
47  
48  
49  
50  
51  
52  
53  
54  
55  
56  
57  
58  
59  
60

1  
2  
3 Australia over the entire study period as the reference to calculate age-adjusted standardised  
4 mortality ratio (SMR) of both sexes which were mapped.  
5  
6

## 7 8 **RESULTS**

9  
10 This study included 45,293 suicide deaths in 20 years and only 187 suicides aged below 15,  
11 about 0.4% of total suicides. Thus we did not specifically analyse the pattern of suicide below  
12 15 years; however, we still keep them in results of all-age groups. Table 1 indicates that most  
13 of suicides occurred in those aged between 15 and 54 and occurred in capital cities and  
14 regional centres, as the majority of Australian population live in urban areas. However,  
15 suicide rate in rural and remote areas was higher than that in urban areas. Around 80% of  
16 suicides were males and most suicides aged between 15 and 54 years, while older males (75-  
17 year and over) had higher suicide rate than males in other age groups. Most suicides were in  
18 four methods: (1) firearms, air guns and other explosive (simplified as firearms, 16% of total  
19 suicides); (2) hanging (35% of total); (3) gases and vapours (20% of total); (4) solid or liquid  
20 substances (15% of total). The Odds Ratio (OR) and 95% Confident Interval (CI) of suicide in  
21 each population group and by different methods were calculated, using annual average suicide  
22 incidence in the study period in Australia as a reference (Table 1). We also applied Chi square  
23 test to check the suicide cases distribution by population groups and methods, and all the  
24 results are significant.  
25  
26  
27  
28  
29  
30  
31  
32  
33  
34  
35  
36  
37  
38  
39  
40  
41  
42  
43  
44

45 Table 1 about here

46  
47  
48 Figure 1 shows the time-series trends of suicide by different groups. There was a peak of  
49 suicide rate among the total population from 1996 to 1998, particularly in males aged from 15  
50 to 34 years (A), males in rural and remote areas (B) and suicide completed by hanging (C). In  
51 the early years of the study period, suicide incidence among 55 years and over was higher  
52 than those below 55 years, however, it was observed to drop lower than that of young and  
53  
54  
55  
56  
57  
58  
59  
60

1  
2 middle aged adults after 2000, particular in males (A). Suicide rate among 15 to 34 years had  
3  
4 peaks in 1997 and 1998 (especially for male at around 34 per 100,000 and total at around 21  
5  
6 per 100,000) and kept relatively steady in other years (14 to 17 per 100,000 for total and 25 to  
7  
8 28 per 100,000 for male) (A). In 1986, firearms and other explosives were the most common  
9  
10 methods of suicide in Australia, over 6 per 100,000 among males. However, the rate dropped  
11  
12 to around 2 per 100,000 in 2005. By contrast, male suicide rate by hanging rose from 3.8 per  
13  
14 100,000 in 1986 to 9.4 per 100,000 in 2005, after experiencing a peak of 10.6 per 100,000 in  
15  
16 1998 (C). Suicide rates by hanging in males dropped after 1997 but were still higher than the  
17  
18 early years of the study period. Figure 2 used 5-year periods to explore suicide of specific  
19  
20 methods by age groups and urban rural differences for a better visual effect. Suicide rates by  
21  
22 firearms decreased over the study period, especially among aged 15 to 54 years and in rural  
23  
24 and remote areas (Figure 2A and 2B); while suicide by hanging increased dramatically and  
25  
26 reached a peak from 1996 to 2000, especially among aged 15-54 years (Figure 2A). For aged  
27  
28 55 and elder, suicide rate by hanging and firearms kept more stable than aged 54 and younger  
29  
30 over the study period. Suicide rates by gases and vapours, solid and liquid substances slightly  
31  
32 fluctuated in the study period among all population groups (Figure 2A and 2B). More details  
33  
34 of suicide incidence trend over time in each population group and suicide methods were  
35  
36 indicated in Supplemental 1 and 2. Poisson regression was implemented to examine the time  
37  
38 series trend of suicide rates across population groups and by methods (Table 2). Suicide rates  
39  
40 by sex, 55 years and over, in urban areas, and completed by firearms, solid and liquid  
41  
42 substances had significantly decreased over time. However, suicide rates by hanging  
43  
44 significantly increased. In this study, there were more decreased male suicide rate by firearms  
45  
46 from period 1991-1995 to period 1996-2000 than other adjacent period (from period 1980-  
47  
48 1990 to period 1991-1995, and from period 1996-2000 to period 2001-2005) as Table 3  
49  
50 indicated.  
51  
52  
53  
54  
55  
56  
57  
58  
59  
60



1  
2  
3 Figure 1 about here  
4

5  
6 Figure 2 about here  
7

8  
9 Table 2 about here  
10

11  
12 Table 3 about here  
13

14  
15 Figure 3 indicates that among 15 to 34 years, north and central south of Northern Territory  
16 (NT), northeast and some southern parts of Western Australia (WA), northwest and central  
17 inland areas of Queensland (QLD) and some inland areas of New South Wales (NSW) had  
18 higher suicide mortalities (2A). The patterns were also similar for males (NT, QLD and WA  
19 in B1). Population aged between 35 and 74 had fewer high-risk areas than that aged 15 to 34  
20 (A2 and A3). For those aged 75 and over, mortalities in north and inland of QLD and a few  
21 LGAs in NSW and WA was higher than other areas; around 40% of total LGAs and  
22 unincorporated SLAs in NT and SA had no suicide occurred. Compared with males, more  
23 areas, e.g., northeast NT, most of rural/remote areas in WA and inland QLD, had no female  
24 suicide (2B). Rural and remote areas had lower rates by self-poison than urban areas, except  
25 for some LGAs in inland QLD, east SA and south WA (2C).  
26  
27  
28  
29  
30  
31  
32  
33  
34  
35  
36  
37  
38  
39

40 Figure 3 about here  
41

42  
43 As suicide rates by firearms and by hanging had more significant changes over time than  
44 other methods and by population groups, we also explored whether this trend existed in  
45 spatial scales over time by cutting the whole study period into four 5-year periods (Figure 4).  
46  
47 Figure 4A indicates that suicide rate by hanging was low in the early years of study period  
48 (A1), and very few suicides occurred in rural and remote areas in WA, NT, QLD and NSW.  
49  
50 However, the **suicide rate by hanging has increased in most areas of Australia since 1986.**  
51  
52 North of WA, NT and SA, north of QLD and even urban LGAs had much higher suicide rates  
53  
54  
55  
56  
57  
58  
59  
60

1  
2  
3 between 1996 and 2005 compared with that in earlier years. Some areas (e.g., Mornington  
4 Shire (MTS) of northwest of QLD, Bathurst-Melville (BM) of NT) had dramatic increase of  
5 suicide by hanging. Both of them experienced increased number of suicide cases (especially  
6 for suicide by hanging) between 1996 and 2005 (27 in MTS, 23 males and 26 by hanging; 23  
7 in BM, 22 males and 20 by hanging), compared to that between 1986 and 1995 (4 in MTS,  
8 male and 3 by hanging; 3 in BM, male and by hanging). Suicide rates by hanging in MTS  
9 increased from 28.79 (1986-1995, annual average) to 236.32 per 100,000 (1996-2005, annual  
10 average); and in BM increased from 14.10 (1986-1995, annual average) to 86.39 per 100,000  
11 (1996-2005, annual average). However, the trend of suicide by firearms was opposite to that  
12 of suicide by hanging (Figure 4B), especially in SA and NT, north and inland areas in NSW  
13 and QLD, and middle of WA (B1 and B2). In general, unincorporated NT and SA had much  
14 more suicide cases reported after 1996 (123 from 1996 to 2005) compared with the period  
15 before 1996 (22 from 1986-1995).

16  
17  
18  
19  
20  
21  
22  
23  
24  
25  
26  
27  
28  
29  
30  
31  
32 Figure 4 about here  
33  
34

## 35 DISCUSSION

36  
37 This study explored suicide patterns in a range of different combinations of age, time,  
38 method, and location in Australia, using both dynamic (trends over time) and static (averages  
39 over the entire study period) approaches. Males accounted for most suicides. Suicide rate was  
40 relatively higher among youths, young and middle-aged adults, in rural and remote areas, and  
41 by hanging and by firearms. However, suicide rate among 55 years and over was higher than  
42 population aged below 55 in the early years of the study period and then decreased  
43 significantly, especially for older males. Suicide by firearms decreased during the study  
44 period, while suicide by hanging kept increasing, especially in males and rural/remote areas.  
45  
46  
47  
48  
49  
50  
51  
52  
53  
54  
55  
56  
57  
58  
59  
60

1  
2  
3 The spatial and spatiotemporal patterns of suicide were consistent with yearly mean and  
4 temporal trends of suicide among different groups.  
5  
6

7  
8 Elderly and upper middle-aged adults (55-years and over) usually have more loneliness and  
9 other health issues (e.g., chronic diseases) compared with the younger age population, which  
10 may lead to psychiatric symptoms, e.g., anxiety, sense of hopelessness and despair.<sup>22 23</sup> And  
11 usually older adults are less likely to seek psychiatric support when they have relevant  
12 symptoms, especially in earlier years (e.g., before the middle of 1990s).<sup>24</sup> Suicidal behaviours  
13 among older adults were attributed from psychiatric disorders among them, which were  
14 resulted from both of other health problems and reluctance for psychiatry support.<sup>22-24</sup> These  
15 may explain the higher annual average suicide rate among older adults than younger age  
16 groups in general, especially among males. However, suicide rate among this age group  
17 gradually decreased in the study period, especially after 2000, with an increased use of  
18 antidepressants among older adults.<sup>25</sup> Evidence also indicates that antidepressants can reduce  
19 psychological disorders, e.g., depression, and suicidal behaviours among the elderly,  
20 especially when combined with other interventions (e.g., counselling and family support).<sup>26</sup>  
21 Selective serotonin reuptake inhibitors have less side effects (e.g., cardiovascular impairs and  
22 drug interactions) than other drugs, and have been widely recommended to older adults from  
23 clinics.<sup>27 28</sup> Studies in other countries have also provided evidence about the protective effect  
24 of antidepressants on severe depression and suicide behaviours, although treatment of other  
25 levels of depression are still not clear.<sup>29 30</sup>  
26  
27  
28  
29  
30  
31  
32  
33  
34  
35  
36  
37  
38  
39  
40  
41  
42  
43  
44  
45  
46  
47

48 The rate of suicide rate by fire arms kept decreasing during the study period while suicide by  
49 hanging increased, especially among 54 years and younger. A study in Victoria indicated that  
50 a decreased registration of firearms and lower suicide rates were significantly correlated from  
51 1997 to 2000.<sup>31</sup> Before 1996, the importation of firearms was controlled by the  
52 Commonwealth; and the sales and possession of firearms were regulated by states and  
53  
54  
55  
56  
57  
58  
59  
60

1  
2  
3 territories in Australia.<sup>32</sup> Some states had lag in progressing firearm control.<sup>33</sup> The Port Arthur  
4  
5 Massacre in Tasmania proposed Australia enacting The National Firearms Agreement in  
6  
7 1996, which regulates firearm sale, registration, storage and “bans on specific types of  
8  
9 firearms” nationally.<sup>34</sup> Our study found more decreased male suicide rate by firearms from  
10  
11 period 1991-1995 to period 1996-2000 than comparing other adjacent periods (e.g., period  
12  
13 1991-1995 compared with period 1986-1990). Thus it is suggestive that more strict firearm  
14  
15 law enforcement may have led to significant lower suicide rate by firearms over an extended  
16  
17 period at the national level after 1996.<sup>31</sup> However, other studies indicated that decreased  
18  
19 firearm suicide rate in young adults was accompanied with rising suicide rates by other  
20  
21 methods at the national and local level.<sup>35 36</sup> Our study also found this trend, especially among  
22  
23 males. Similarly, other countries experienced decreased suicide rate by firearms and increased  
24  
25 suicide rate by hanging over time.<sup>37 38</sup> This may due to increased substitute methods (e.g.,  
26  
27 hanging) for firearms, especially after 1996 when availability of firearms dropped in  
28  
29 Australia.<sup>39</sup> Thus those who seek violent methods for suicide may prefer using hanging rather  
30  
31 than firearms. Youths and middle-aged adults, which are less adaptable to social changes and  
32  
33 less exposed to firearms compared with older adults, are more likely to stop using firearms  
34  
35 after new law enforcement but relatively fragile to social and family difficulties.<sup>33</sup> Thus the  
36  
37 changes of patterns of suicide by firearms and hanging are more dynamic among youths and  
38  
39 middle-aged adults than older adults. Suicide rate by firearms in rural areas was higher than  
40  
41 that in urban areas, owing much to the availability of firearms. More evidence, including the  
42  
43 interaction between socio-economic changes and suicide methods, still needs to be assessed,  
44  
45 especially for recent years.

50  
51  
52 Only a small percentage of population and suicides were for those aged 75 and over, thus  
53  
54 many LGAs had no suicides or higher suicide rate among older adults, especially in rural and  
55  
56 remote areas. Usually areas with high risk of suicide have lower socio-economic status, along  
57  
58  
59  
60

1  
2  
3 with higher proportion of Indigenous population.<sup>14</sup> Our previous study indicated that  
4 Mornington Shire in QLD and Bathurst-Melville in north of NT had much higher suicide risk,  
5 proportion of Indigenous population and lower socio-economic status than the national  
6 average, and both were indicated as high risk clusters using spatial cluster analysis (1999-  
7 2003).<sup>14</sup> Suicide by hanging has increased in Indigenous communities, as similar as other  
8 areas and population groups.<sup>38</sup> Alcohol has been introduced to the Aboriginal communities in  
9 Indigenous communities (e.g., Top North of NT and SA), and local people tended to be  
10 mentally and psychologically jeopardised by domestic violence and social disruptions related  
11 to alcohol use even from early years,<sup>40 41</sup> especially among youth and young adults.<sup>42</sup> Thus  
12 suicide behaviours were triggered from mental health problems after years of indirect  
13 influence from alcohol and can be spread quickly within an isolated community with limited  
14 population.<sup>43 44</sup> Family conflicts and social disruption have been reported contribution to the  
15 high suicide incidence in Indigenous population, e.g., lost of relatives in early lives due to a  
16 shorter life expectancy compared with non-Indigenous population, self-destructive and anti-  
17 social behaviours, unsolved anger and other life events.<sup>45</sup> Hanging acted as a substitute to  
18 other methods like firearms and poison, which may indicate that most Indigenous suicides  
19 were completed by hanging, especially after 1995.<sup>46</sup> Although Indigenous status of suicide  
20 was not available in this study, yet the results were consistent with previous studies. This  
21 mechanism may also explain the increased suicide cases in unincorporated areas in NT  
22 (including Bathurst-Melville) and SA in general over the study period.

23  
24  
25  
26  
27  
28  
29  
30  
31  
32  
33  
34  
35  
36  
37  
38  
39  
40  
41  
42  
43  
44  
45  
46  
47  
48 The differences of suicide reporting systems may also influence the results. For example,  
49 Williams et al reported that suicide rate in Queensland from the Queensland Suicide Register  
50 (QSR) was higher than that from the Australian Bureau of Statistics (ABS), reasoning that the  
51 disparity was due to such factors as information management and definition of suicidal  
52 behaviours.<sup>47</sup> Thus the QLD suicide rate using ABS database was lower than using QSR  
53  
54  
55  
56  
57  
58  
59  
60

1  
2  
3 database, especially after 2000. However, ABS had a higher standard for evaluating the  
4 causes of deaths, e.g., complete documents from hospital or police, which confirmed the  
5 accuracy of information of current suicide database.<sup>48</sup> To keep the consistence of suicide data  
6 reporting system across different states and accuracy of suicide database, we use ABS suicide  
7 database in this study.  
8  
9  
10  
11  
12

13  
14 Recommendations on future research and public interventions can be proposed based on the  
15 results of this study. Firstly, more details (e.g., health and financial status, alcohol and drugs  
16 use, and family conflicts history) of suicide victims need to be acquired to help public health  
17 policy makers and health workers to design and implement suicide control and prevention  
18 strategies targeting particular population groups (e.g., male young adults) and areas (e.g.,  
19 Indigenous communities). Suicide by firearms is still significant especially in rural and  
20 remote areas. Thus effectiveness of control and prevention strategies e.g., firearm and  
21 pesticide restrictions,<sup>49 50</sup> need to be evaluated. Gatekeeper education and training on rural  
22 general practitioners are necessary in increasing their capacity of identifying local vulnerable  
23 population and suicidal behaviours to reduce potential suicide risk. Education of primary  
24 health workers and the general population are vital in reducing suicidal behaviours,<sup>51-54</sup> and  
25 effectiveness of health education programs needs to be assessed locally. These activities  
26 should be explored at a local level, especially in high risk areas and population groups, to  
27 assess and improve the effectiveness of suicide prevention programs. Socioeconomic  
28 variables (e.g., income and unemployment)<sup>55 56</sup> and environmental factors (e.g., temperature,  
29 rainfall)<sup>57-59</sup> have associations with suicide over time periods. Thus the association of these  
30 factors on suicide over spaces should also be addressed by time series analysis (e.g., in capital  
31 cities which contains a certain number of suicide cases every month) and spatial modelling  
32 analysis. As suicide is a complex issue, cross-sectional and multi-disciplinary approaches  
33 need to be implemented in suicide control and prevention in different levels (e.g., national,  
34  
35  
36  
37  
38  
39  
40  
41  
42  
43  
44  
45  
46  
47  
48  
49  
50  
51  
52  
53  
54  
55  
56  
57  
58  
59  
60

1  
2  
3 state and local). In conclusion, this study has explored patterns of suicide across population  
4  
5 groups and by suicide methods over time and space. These results may have significant  
6  
7 implication for developing national suicide prevention strategies through focusing on high  
8  
9 risk population groups, local areas and specific suicide methods.  
10

### 11 12 **Contributorship statement**

13  
14  
15 Xin Qi designed the study, implemented all statistical analyses and drafted the manuscript.  
16  
17 Shilu Tong conceptualised the idea and revised the study protocol, especially the research  
18  
19 design and data analysis. Wenbiao Hu provided advice on statistical analyses and  
20  
21 interpretation of the results. Andrew Page helped interpreting the results and drafting the  
22  
23 manuscript. All the authors contributed to the preparation of the final manuscript and  
24  
25 approved the submission.  
26  
27

### 28 29 **Competing interests**

30  
31  
32 We declare that we have no competing interests.  
33  
34

### 35 36 **Funding**

37  
38 Xin Qi was funded by the QUT Postgraduate Research Award Scholarship, and Shilu Tong  
39  
40 was supported by a NHMRC Research Fellowship (#553043). We also thank Prof. Richard  
41  
42 from University of New South Wales for providing the suicide data, Dr. Lyle Turner from  
43  
44 Monash University for his comments on the manuscript.  
45  
46

### 47 48 **Data sharing**

49  
50 No additional data available  
51  
52  
53  
54  
55  
56  
57  
58  
59  
60

## Reference

- 1 World Health Organization (2012) Suicide prevention (SUPRE). Available: [http://www.who.int/mental\\_health/prevention/suicide/suicideprevent/en/index.html](http://www.who.int/mental_health/prevention/suicide/suicideprevent/en/index.html) (Assessed 08 September 2012)
- 2 Bando DH, Brunoni AR, Benseñor IM, *et al.* Suicide rates and income in São Paulo and Brazil: a temporal and spatial epidemiologic analysis from 1996 to 2008. *BMC Psychiatry* 2012;12:127.
- 3 Phillips MR, Li X, Zhang Y. Suicide rates in China, 1995-99. *Lancet* 2002;359:835–840.
- 4 Patel V, Ramasundarahettige C, Vijayakumar L, *et al.* Suicide mortality in India: a nationally representative survey. *Lancet* 2012;379:2343–2351.
- 5 Pridemore WA, Spivak AL. Patterns of suicide mortality in Russia. *Suicide Life Threat Behav* 2003;33:132–150.
- 6 Chang SS, Sterne JA, Wheeler BW, *et al.* Geography of suicide in Taiwan: spatial patterning and socioeconomic correlates. *Health Place* 2011;17:641–650.
- 7 Gunnell D, Wheeler B, Chang SS, *et al.* Changes in the geography of suicide in young men: England and Wales 1981--2005. *J Epidemiol Community Health* 2012;66:536–543.
- 8 Miller M, Azrael D, Barber C. Suicide mortality in the United States: the importance of attending to method in understanding population-level disparities in the burden of suicide. *Annu Rev Public Health* 2012;33:393–408.



1  
2  
3 9 ABS. 3309.0 *Suicides, Australia, 1921 to 1998*. Australian Bureau of Statistics, Canberra,  
4 Australia, 2000.

5  
6  
7 10 ABS. 3309.0. *Suicides, Australia, 2005*. Australian Bureau of Statistics, Canberra,  
8 Australia, 2007.

9  
10  
11 11 ABS. 3309.0. *Suicides, Australia, 2010*. Australian Bureau of Statistics, Canberra,  
12 Australia, 2012.

13  
14  
15 12 Spittal MJ, Pirkis J, Miller M, *et al*. Declines in the lethality of suicide attempts explain the  
16 decline in suicide deaths in Australia. *PLOS One* 2012;7:e44565.

17  
18  
19 13 Large MM, Niessen OB. Suicide in Australia: meta-analysis of rates and methods of  
20 suicide between 1988 and 2007. *Med J Aust* 2010;192:432–437.

21  
22  
23 14 Qi X, Hu W, Page A, Tong S. Spatial clusters of suicide in Australia. *BMC Psychiatry*,  
24 2012;12:86.

25  
26  
27 15 Cheung YT, Spittal MJ, Pirkis J, *et al*. Spatial analysis of suicide mortality in Australia:  
28 investigation of metropolitan-rural-remote differentials of suicide risk across states/territories.  
29 *Soc Sci Med* 2012;75:1460–1468.

30  
31  
32 16 Wilkinson D, Hiller J, Moss J, *et al*. Mortality variation across Australia: descriptive data  
33 for states and territories, and statistical divisions. *Aust N Z J Public Health*, 2000;24:226-233.

34  
35  
36 17 Burnley IH. Differential and spatial aspects of suicide mortality in New South Wales and  
37 Sydney, 1980 to 1991. *Aust J Public Health*, 1994;18:293-304.

38  
39  
40 18 WHO. *International Classification of Diseases, 9th revision (ICD-9)*. Geneva: World  
41 Health Organization, 1975.

42  
43  
44 19 WHO. *The ICD-10 classification of mental and behavioral disorders*. Geneva: World  
45 Health Organization, 1992.

46  
47  
48 20 MapInfo Corporation. *MapInfo Professional 10.5 User Guide*. MapInfo Corporation, New  
49 York, United States of America, 2010.

50  
51  
52 21 Arbuckle JL. *IBM SPSS Amos 21 User's Guide*. IBM Corporation North Castle Drive  
53 Armonk, NY 10504-1785 United States of America, 2012.

- 1  
2  
3 22 Loboprabhu S, Molinari V. Severe loneliness in community-dwelling aging adults with  
4 mental illness. *J Psychiatr Pract* 2012;18:20–28.  
5  
6  
7 23 Bekhet AK, Zauszniewski JA. Mental health of elders in retirement communities: is  
8 loneliness a key factor? *Arch Psychiatr Nurs* 2012;26:214–224.  
9  
10  
11 24 Pearson JL, Conwell Y, Lindesay J, *et al*. Elderly suicide: A multi-national view. *Aging*  
12 *Ment Health* 1997;1:107-111.  
13  
14  
15 25 Hall WD, Mant A, Mitchell PB, *et al*. Association between antidepressant prescribing and  
16 suicide in Australia, 1991–2000: trend analysis. *BMJ* 2003;326:1008.  
17  
18  
19 26 Hickie IB, Davenport TA, Naismith SL, *et al*. Treatment of common mental disorders in  
20 Australian general practice. *Med J Aust* 2001;175 Suppl:S25–30.  
21  
22  
23 27 Mackay FR, Dunn NR, Martin RM, *et al*. Newer antidepressants: a comparison of  
24 tolerability in general practice. *Br J Gen Pract* 1999;49:892–896.  
25  
26  
27 28 Preskorn SH. Antidepressant drug selection: criteria and options. *J Clin Psychiatry*  
28 1994;55 Suppl A:6–22.  
29  
30  
31 29 Mojtabai R. The public health impact of antidepressants: an instrumental variable analysis.  
32 *J Affect Disord* 2011;134:188–197.  
33  
34  
35 30 Friedman RA, Leon AC. Expanding the black box - depression, antidepressants, and the  
36 risk of suicide. *N Engl J Med* 2007;356:2343–2346.  
37  
38  
39 31 Ozanne-Smith J, Ashby K, Newstead S, *et al*. Firearm related deaths: the impact of  
40 regulatory reform. *Inj Prev* 2004;10:280–286.  
41  
42  
43 32 Norberry J, Woolner D, Magarey K. *After Port Arthur - Issues of Gun Control in*  
44 *Australia*. Parliamentary Library Current Issues Brief 16, 1995-96. Department of the  
45 Parliamentary Library, Canberra, Australia, 1996.  
46  
47  
48 33 AMPC. *Australasian Police Ministers' Council (APMC), Special Firearms Meeting,*  
49 *Canberra, 10 May 1996: Resolutions*. Canberra, Australia, 1996.  
50  
51  
52 34 The Library of Congress. *Firearms-Control Legislation and Policy: Australia*. Available at:  
53 <http://www.loc.gov/law/help/firearms-control/australia.php#Firearms> (Accessed 15 May  
54 2014).  
55  
56  
57  
58  
59  
60

- 1  
2  
3 35 Klieve H, Barnes M, De Leo D. Controlling firearms use in Australia: has the 1996 gun  
4 law reform produced the decrease in rates of suicide with this method? *Soc Psychiatry*  
5 *Psychiatr Epidemiol* 2009;44:285–292.  
6  
7  
8  
9 36 McPhedran S, Baker J. Suicide prevention and method restriction: evaluating the impact of  
10 limiting access to lethal means among young Australians. *Arch Suicide Res* 2012;16:135–146.  
11  
12  
13 37 Cent.Dis. Control Prev. Compressed mortality file (underlying cause-of-death). Wide-  
14 Ranging Online Data for Epidemiologic Research (WONDER) database, 2010. Available:  
15 <http://wonder.cdc.gov/mortSQL.html> (Assessed 08 September 2012).  
16  
17  
18  
19 38 Stark C, Hopkins P, Gibbs D, *et al.* Trends in suicide in Scotland 1981-1999: age, method  
20 and geography. *BMC Public Health* 2004;4:49.  
21  
22  
23 39 Wilkinson D, Gunnell D. Comparison of trends in method-specific suicide rates in  
24 Australia and England & Wales, 1968-97. *Aust N Z J Public Health* 2000;24:153–157.  
25  
26  
27 40 Hunter E, Reser J, Baird M, *et al.* *An analysis of suicide in Indigenous communities in*  
28 *North Queensland. The historical cultural and symbolic landscape.* Commonwealth  
29 Department of Health and Aged Care, Australia, 1999.  
30  
31  
32  
33 41 Austin AE, van den Heuvel C, Byard RW. Causes of community suicides among  
34 indigenous South Australians. *J Forensic Leg Med* 2011;18:299–301.  
35  
36  
37 42 Tse R, Sims N, Byard RW. Alcohol ingestion and age of death in hanging suicides. *J*  
38 *Forensic Sci* 2011;56:922–924.  
39  
40  
41 43 Cantor CH, Baume P. Access to methods of suicide. What impact? *Aust N Z J Psychiatry*  
42 1998;32:8–14.  
43  
44  
45 44 Beautrais A. Risk factors for suicide and attempted suicide among young people. *Aust N Z*  
46 *J Psychiatry* 2000;34:420–436.  
47  
48  
49 45 De Leo D, Svetcic J, Milner A, *et al.* *Suicide in Indigenous populations of Queensland.*  
50 Australian Academic Press, Bowen Hills, Queensland, Australia, 2011.  
51  
52  
53  
54 46 Parker R, Ben-Tovim DI. A study of factors affecting suicide in Aboriginal and 'other'  
55 populations in the Top End of the Northern Territory through an audit of coronial records.  
56 *Aust N Z J Psychiatry* 2002;36:404–410.  
57  
58  
59  
60

- 1  
2  
3 47 Williams R, Doessel D, Svetcic J, *et al*. Accuracy of official suicide mortality data in  
4 Queensland. *Aust N Z J Psychiatry* 2010;44:815–822.  
5  
6  
7 48 ABS. 3303.0. *Causes of death, Australia, 2007*. Australian Bureau of Statistics, Canberra,  
8 Australia, 2009.  
9  
10  
11 49 Lester D, Leenaars A. Suicide rates in Canada before and after tightening firearm control  
12 laws. *Psychol Rep* 1993;72:787–790.  
13  
14  
15 50 Ludwig J, Cook PJ. Homicide and suicide rates associated with implementation of the  
16 Brady Handgun Violence Prevention Act. *JAMA* 2000;284:585–591.  
17  
18  
19 51 Rihmer Z, Belso N, Kalmar S. Antidepressants and suicide prevention in Hungary. *Acta*  
20 *Psychiatr Scand* 2001;103:238–239.  
21  
22  
23 52 Jorm AF, Christensen H, Griffiths KM. The impact of beyond blue: the national  
24 depression initiative on the Australian public's recognition of depression and beliefs about  
25 treatments. *Aust N Z J Psychiatry* 2005;39:248–254.  
26  
27  
28 53 Paykel ES, Hart D, Priest RG. Changes in public attitudes to depression during the Defeat  
29 Depression Campaign. *Br J Psychiatry* 1998;173:519–522.  
30  
31  
32 54 Mann JJ, Apter A, Bertolote J, *et al*. Suicide prevention strategies: a systematic review.  
33 *JAMA* 2005;294:2064–2074.  
34  
35  
36 55 Huisman M, Oldehinkel AJ. Income inequality, social capital and self-inflicted injury and  
37 violence-related mortality. *J Epidemiol Community Health* 2009;63:31–37.  
38  
39  
40 56 Chan WS, Yip PS, Wong PW, *et al*. Suicide and unemployment: what are the missing  
41 links? *Arch Suicide Res* 2007;11:327–335.  
42  
43  
44 57 Lambert G, Reid C, Kaye D, *et al*. Increased suicide rate in the middle-aged and its  
45 association with hours of sunlight. *Am J Psychiatry* 2003;160:793–795.  
46  
47  
48 58 Nicholls N, Butler CD, Hanigan I. Inter-annual rainfall variations and suicide in New  
49 South Wales, Australia, 1964–2001. *Int J Biometeorol* 2006;50:139–143.  
50  
51  
52 59 Fragar LJ, Gray EJ, Franklin RJ, *et al*. *A picture of health: a preliminary report of the*  
53 *health of country Australians*. The Australian Agricultural Health Unit, P.O. Box 256, Moree,  
54 NSW 2400, Australia, 1997.  
55  
56  
57  
58  
59  
60

1  
2  
3  
4  
5  
6  
7  
8  
9  
10  
11  
12  
13  
14  
15  
16  
17  
18  
19 Figure 1: suicide rates over time and sub-groups (per 100,000)

20 A: Sex and age groups; B: Sex and urban rural differences; C: Sex and methods;

21  
22  
23 Figure 2: suicide rates over time and methods (per 100,000, annual average)

24 A: Methods and age groups; B: Methods and urban rural difference

25  
26  
27 Figure 3: Suicide rates among different groups across Australia (1986-2005)

28  
29  
30 Figure 4: Suicide rates by self-harm over time and across space in Australia (1986-2005)

Table 1: Suicide deaths and rate (per 100,000) across different groups in Australia (1986-2005)

| Population group                | Age group |       |                     | 35 to 54 |       |                   | 55 to 74 |       |                   | 75 & over |       |                   | All ages |       |                   |
|---------------------------------|-----------|-------|---------------------|----------|-------|-------------------|----------|-------|-------------------|-----------|-------|-------------------|----------|-------|-------------------|
|                                 | 15 to 34  |       |                     | Cases    | Rate  | Rate Ratio        | Cases    | Rate  | Rate Ratio        | Cases     | Rate  | Rate Ratio        | Cases    | Rate  | Rate Ratio        |
|                                 | Cases     | Rate  | Rate Ratio (95% CI) |          |       | (95% CI)          |          |       | (95% CI)          |           |       | (95% CI)          |          |       | (95% CI)          |
| <b>By sex</b>                   |           |       |                     |          |       |                   |          |       |                   |           |       |                   |          |       |                   |
| Male                            | 15,059    | 28.29 | 2.23 (2.19, 2.27)   | 12,672   | 25.61 | 2.02 (1.98, 2.06) | 5,986    | 22.35 | 1.77 (1.72, 1.81) | 2,091     | 30.98 | 2.45 (2.34, 2.56) | 35,942   | 20.32 | 1.61 (1.58, 1.63) |
| Female                          | 3,242     | 6.12  | 0.48 (0.47, 0.50)   | 3,556    | 7.14  | 0.56 (0.55, 0.58) | 1,818    | 6.48  | 0.51 (0.49, 0.54) | 682       | 6.14  | 0.49 (0.45, 0.52) | 9,351    | 5.17  | 0.41 (0.40, 0.42) |
| <b>By region</b>                |           |       |                     |          |       |                   |          |       |                   |           |       |                   |          |       |                   |
| Capital cities                  | 11,267    | 16.28 | 1.29 (1.26, 1.31)   | 9,736    | 15.68 | 1.24 (1.21, 1.27) | 4,568    | 14.21 | 1.12 (1.09, 1.16) | 1,674     | 15.45 | 1.22 (1.16, 1.28) | 27,332   | 12.32 | 0.97 (0.96, 0.99) |
| Regional centres                | 3,423     | 17.57 | 1.39 (1.34, 1.44)   | 3,269    | 17.72 | 1.40 (1.35, 1.45) | 1,550    | 13.65 | 1.03 (1.03, 1.14) | 584       | 15.96 | 1.26 (1.16, 1.37) | 8,869    | 12.86 | 1.02 (1.00, 1.04) |
| Rural & remote areas            | 3,611     | 20.58 | 1.63 (1.57, 1.68)   | 3,223    | 17.23 | 1.36 (1.31, 1.41) | 1,686    | 14.88 | 1.18 (1.12, 1.23) | 515       | 15.37 | 1.21 (1.11, 1.32) | 9,092    | 13.55 | 1.07 (1.05, 1.09) |
| <b>By methods</b>               |           |       |                     |          |       |                   |          |       |                   |           |       |                   |          |       |                   |
| Firearms & other explosives     | 2,795     | 2.63  | 0.21 (0.20, 0.22)   | 2,285    | 2.30  | 0.18 (0.18, 0.19) | 1,674    | 3.05  | 0.24 (0.23, 0.25) | 556       | 3.11  | 0.25 (0.23, 0.27) | 7,348    | 2.07  | 0.16 (0.16, 0.17) |
| Gases & vapours                 | 3,457     | 3.25  | 0.26 (0.25, 0.27)   | 4,104    | 4.13  | 0.33 (0.32, 0.34) | 1,277    | 2.33  | 0.18 (0.17, 0.20) | 375       | 2.10  | 0.17 (0.15, 0.18) | 9,214    | 2.60  | 0.20 (0.20, 0.21) |
| Hanging                         | 7,366     | 6.93  | 0.55 (0.54, 0.56)   | 4,927    | 4.96  | 0.39 (0.38, 0.41) | 2,301    | 4.20  | 0.33 (0.32, 0.35) | 901       | 5.05  | 0.40 (0.37, 0.43) | 15,620   | 4.40  | 0.35 (0.34, 0.35) |
| Solid or liquid substances      | 2,166     | 2.04  | 0.16 (0.16, 0.17)   | 2,863    | 2.88  | 0.23 (0.22, 0.24) | 1,333    | 2.43  | 0.19 (0.18, 0.20) | 434       | 2.43  | 0.19 (0.18, 0.21) | 6,807    | 1.92  | 0.15 (0.15, 0.15) |
| Other                           | 2,517     | 1.26  | 0.19 (0.18, 0.20)   | 2,049    | 2.06  | 0.16 (0.16, 0.17) | 1,219    | 2.22  | 0.18 (0.17, 0.19) | 507       | 2.84  | 0.23 (0.21, 0.25) | 6,294    | 1.78  | 0.14 (0.14, 0.14) |
| <b>By region and by sex</b>     |           |       |                     |          |       |                   |          |       |                   |           |       |                   |          |       |                   |
| <b>Male</b>                     |           |       |                     |          |       |                   |          |       |                   |           |       |                   |          |       |                   |
| Capital cities                  | 9,072     | 26.66 | 2.08 (2.03, 2.13)   | 7,439    | 24.59 | 1.92 (1.87, 1.97) | 3,358    | 21.86 | 1.71 (1.65, 1.77) | 1,179     | 30.02 | 2.35 (2.22, 2.49) | 21,107   | 19.63 | 1.53 (1.51, 1.56) |
| Regional centres                | 2,868     | 29.90 | 2.33 (2.25, 2.42)   | 2,593    | 28.60 | 2.23 (2.15, 2.32) | 1,213    | 22.21 | 1.74 (1.64, 1.84) | 468       | 32.80 | 2.57 (2.35, 2.81) | 7,173    | 21.39 | 1.67 (1.63, 1.71) |
| Rural/remote areas              | 3,119     | 32.46 | 2.72 (2.62, 2.82)   | 2,640    | 25.99 | 2.16 (2.08, 2.24) | 1,415    | 23.73 | 1.94 (1.84, 2.04) | 444       | 31.82 | 2.60 (2.37, 2.85) | 7,662    | 21.39 | 1.77 (1.73, 1.82) |
| <b>Female</b>                   |           |       |                     |          |       |                   |          |       |                   |           |       |                   |          |       |                   |
| Capital cities                  | 2,195     | 6.40  | 0.50 (0.48, 0.52)   | 2,297    | 7.39  | 0.58 (0.55, 0.60) | 1,210    | 7.33  | 0.57 (0.54, 0.61) | 495       | 7.26  | 0.57 (0.52, 0.62) | 6,225    | 5.58  | 0.44 (0.42, 0.45) |
| Regional centres                | 555       | 5.75  | 0.45 (0.42, 0.49)   | 676      | 7.37  | 0.58 (0.53, 0.62) | 337      | 5.83  | 0.46 (0.41, 0.51) | 116       | 5.27  | 0.41 (0.34, 0.50) | 1,696    | 4.91  | 0.38 (0.37, 0.40) |
| Rural/remote areas              | 492       | 5.43  | 0.43 (0.39, 0.47)   | 583      | 6.12  | 0.51 (0.47, 0.55) | 271      | 4.71  | 0.39 (0.34, 0.43) | 71        | 3.41  | 0.28 (0.22, 0.35) | 1,430    | 4.13  | 0.34 (0.33, 0.36) |
| <b>By methods and by region</b> |           |       |                     |          |       |                   |          |       |                   |           |       |                   |          |       |                   |
| <b>Capital cities</b>           |           |       |                     |          |       |                   |          |       |                   |           |       |                   |          |       |                   |
| Firearms & other explosives     | 1,148     | 1.66  | 0.13 (0.12, 0.14)   | 913      | 1.47  | 0.12 (0.11, 0.12) | 626      | 1.95  | 0.15 (0.14, 0.17) | 211       | 1.95  | 0.16 (0.14, 0.18) | 2,908    | 1.31  | 0.10 (0.10, 0.11) |
| Gases & vapours                 | 2,299     | 3.32  | 0.26 (0.25, 0.27)   | 2,420    | 3.90  | 0.31 (0.30, 0.32) | 732      | 2.28  | 0.18 (0.17, 0.19) | 222       | 2.05  | 0.16 (0.14, 0.19) | 5,674    | 2.56  | 0.20 (0.20, 0.21) |
| Hanging                         | 4,339     | 6.27  | 0.50 (0.48, 0.51)   | 3,017    | 4.86  | 0.38 (0.37, 0.40) | 1,470    | 4.57  | 0.36 (0.34, 0.38) | 591       | 5.45  | 0.43 (0.40, 0.47) | 9,478    | 4.27  | 0.30 (0.30, 0.31) |
| Solid or liquid substances      | 1,547     | 2.24  | 0.18 (0.17, 0.19)   | 1,864    | 3.00  | 0.24 (0.23, 0.25) | 901      | 2.80  | 0.22 (0.21, 0.24) | 284       | 2.62  | 0.21 (0.19, 0.23) | 4,600    | 2.07  | 0.16 (0.16, 0.17) |
| Other                           | 1,934     | 2.79  | 0.22 (0.21, 0.23)   | 1,522    | 2.45  | 0.19 (0.18, 0.20) | 839      | 2.61  | 0.21 (0.19, 0.22) | 366       | 3.38  | 0.27 (0.24, 0.30) | 4,672    | 2.11  | 0.17 (0.16, 0.17) |
| <b>Regional centres</b>         |           |       |                     |          |       |                   |          |       |                   |           |       |                   |          |       |                   |
| Firearms & other explosives     | 603       | 3.09  | 0.25 (0.23, 0.27)   | 495      | 2.68  | 0.21 (0.20, 0.23) | 368      | 3.24  | 0.26 (0.23, 0.28) | 131       | 3.58  | 0.28 (0.24, 0.33) | 1,606    | 2.33  | 0.19 (0.18, 0.19) |
| Gases & vapours                 | 631       | 3.24  | 0.26 (0.24, 0.28)   | 861      | 4.67  | 0.37 (0.35, 0.40) | 275      | 2.42  | 0.19 (0.17, 0.22) | 91        | 2.49  | 0.20 (0.16, 0.24) | 1,858    | 2.70  | 0.21 (0.20, 0.22) |
| Hanging                         | 1,502     | 7.71  | 0.61 (0.58, 0.64)   | 1,026    | 5.56  | 0.44 (0.41, 0.47) | 456      | 4.02  | 0.32 (0.29, 0.35) | 187       | 5.11  | 0.40 (0.35, 0.46) | 3,200    | 4.65  | 0.37 (0.36, 0.38) |
| Solid or liquid substances      | 344       | 1.77  | 0.14 (0.13, 0.16)   | 570      | 3.09  | 0.25 (0.23, 0.27) | 258      | 2.27  | 0.18 (0.16, 0.20) | 92        | 2.51  | 0.20 (0.16, 0.24) | 1,268    | 1.84  | 0.15 (0.14, 0.15) |
| Other                           | 343       | 1.76  | 0.14 (0.13, 0.16)   | 317      | 1.72  | 0.14 (0.12, 0.15) | 193      | 1.70  | 0.14 (0.12, 0.16) | 83        | 2.27  | 0.18 (0.15, 0.22) | 937      | 1.36  | 0.11 (0.10, 0.12) |

Table 1: Suicide deaths and rate (per 100,000) across different groups in Australia (1986-2005, continued)

| Population group             | Age group     |              |                          | 35 to 54      |              |                          | 55 to 74     |              |                          | 75 & over    |              |                          | All ages      |              |                     |
|------------------------------|---------------|--------------|--------------------------|---------------|--------------|--------------------------|--------------|--------------|--------------------------|--------------|--------------|--------------------------|---------------|--------------|---------------------|
|                              | Cases         | Rate         | Rate Ratio (95% CI)      | Cases         | Rate         | Rate Ratio (95% CI)      | Cases        | Rate         | Rate Ratio (95% CI)      | Cases        | Rate         | Rate Ratio (95% CI)      | Cases         | Rate         | Rate Ratio (95% CI) |
| Rural/remote areas           |               |              |                          |               |              |                          |              |              |                          |              |              |                          |               |              |                     |
| Firearms & other explosives  | 1,044         | 5.95         | 0.47 (0.44, 0.50)        | 877           | 4.69         | 0.37 (0.35, 0.40)        | 680          | 6.00         | 0.48 (0.44, 0.51)        | 214          | 6.39         | 0.51 (0.44, 0.52)        | 2,834         | 4.22         | 0.33 (0.32, 0.35)   |
| Gases & vapours              | 527           | 3.00         | 0.24 (0.22, 0.26)        | 823           | 4.40         | 0.35 (0.33, 0.37)        | 270          | 2.38         | 0.19 (0.17, 0.21)        | 62           | 1.85         | 0.15 (0.11, 0.19)        | 1,682         | 2.51         | 0.20 (0.19, 0.21)   |
| Hanging                      | 1,525         | 8.69         | 0.69 (0.65, 0.72)        | 884           | 4.73         | 0.37 (0.35, 0.40)        | 375          | 3.31         | 0.26 (0.24, 0.29)        | 123          | 3.67         | 0.29 (0.24, 0.35)        | 2,942         | 4.38         | 0.35 (0.33, 0.36)   |
| Solid or liquid substances   | 275           | 1.57         | 0.12 (0.11, 0.14)        | 429           | 2.29         | 0.18 (0.17, 0.20)        | 174          | 1.54         | 0.12 (0.11, 0.14)        | 58           | 1.73         | 0.14 (0.11, 0.18)        | 939           | 1.40         | 0.11 (0.10, 0.12)   |
| Other                        | 240           | 1.37         | 0.11 (0.10, 0.12)        | 210           | 1.12         | 0.09 (0.08, 0.10)        | 187          | 1.65         | 0.13 (0.11, 0.15)        | 58           | 1.73         | 0.14 (0.11, 0.18)        | 695           | 1.04         | 0.08 (0.08, 0.09)   |
| <b>By methods and by sex</b> |               |              |                          |               |              |                          |              |              |                          |              |              |                          |               |              |                     |
| Male                         |               |              |                          |               |              |                          |              |              |                          |              |              |                          |               |              |                     |
| Firearms & other explosives  | 2,555         | 4.80         | 0.38 (0.37, 0.40)        | 2,123         | 4.29         | 0.34 (0.33, 0.36)        | 1,605        | 5.99         | 0.48 (0.45, 0.50)        | 551          | 8.16         | 0.65 (0.60, 0.70)        | 6,869         | 3.88         | 0.31 (0.30, 0.32)   |
| Gases & vapours              | 2,961         | 5.56         | 0.44 (0.42, 0.46)        | 3,428         | 6.93         | 0.55 (0.53, 0.57)        | 1,091        | 4.07         | 0.32 (0.30, 0.34)        | 324          | 4.80         | 0.38 (0.34, 0.43)        | 7,805         | 4.41         | 0.35 (0.34, 0.36)   |
| Hanging                      | 6,267         | 11.77        | 0.93 (0.91, 0.96)        | 4,115         | 8.32         | 0.66 (0.64, 0.68)        | 1,821        | 6.80         | 0.54 (0.51, 0.56)        | 670          | 9.93         | 0.79 (0.73, 0.85)        | 12,963        | 7.33         | 0.58 (0.57, 0.59)   |
| Solid or liquid substances   | 1,301         | 2.44         | 0.19 (0.18, 0.20)        | 1,573         | 3.18         | 0.25 (0.24, 0.27)        | 671          | 2.51         | 0.20 (0.18, 0.21)        | 198          | 2.93         | 0.23 (0.20, 0.27)        | 3,746         | 2.12         | 0.17 (0.16, 0.17)   |
| Other                        | 1,975         | 3.72         | 0.29 (0.28, 0.31)        | 1,433         | 2.89         | 0.23 (0.22, 0.24)        | 798          | 2.98         | 0.24 (0.22, 0.25)        | 348          | 5.16         | 0.41 (0.37, 0.46)        | 4,559         | 2.58         | 0.20 (0.20, 0.21)   |
| Female                       |               |              |                          |               |              |                          |              |              |                          |              |              |                          |               |              |                     |
| Firearms & other explosives  | 240           | 0.45         | 0.04 (0.03, 0.04)        | 162           | 0.33         | 0.03 (0.02, 0.03)        | 69           | 0.25         | 0.02 (0.02, 0.03)        | 5            | 0.05         | 0.00 (0.00, 0.01)        | 479           | 0.26         | 0.02 (0.02, 0.02)   |
| Gases & vapours              | 496           | 0.94         | 0.07 (0.07, 0.08)        | 676           | 1.36         | 0.11 (0.10, 0.12)        | 186          | 0.66         | 0.05 (0.05, 0.06)        | 51           | 0.46         | 0.04 (0.03, 0.05)        | 1,409         | 0.78         | 0.06 (0.06, 0.07)   |
| Hanging                      | 1,099         | 2.07         | 0.16 (0.15, 0.17)        | 812           | 1.63         | 0.12 (0.11, 0.13)        | 480          | 1.71         | 0.14 (0.12, 0.15)        | 231          | 2.08         | 0.17 (0.15, 0.19)        | 2,657         | 1.47         | 0.12 (0.11, 0.12)   |
| Solid or liquid substances   | 865           | 1.63         | 0.13 (0.12, 0.14)        | 1,290         | 2.59         | 0.21 (0.19, 0.22)        | 662          | 2.36         | 0.19 (0.17, 0.20)        | 236          | 2.13         | 0.17 (0.15, 0.19)        | 3,061         | 1.69         | 0.13 (0.13, 0.14)   |
| Other                        | 542           | 1.03         | 0.08 (0.07, 0.09)        | 616           | 1.23         | 0.10 (0.09, 0.11)        | 421          | 1.50         | 0.12 (0.11, 0.13)        | 163          | 1.42         | 0.12 (0.10, 0.14)        | 1,745         | 0.97         | 0.08 (0.07, 0.08)   |
| <b>Total suicide</b>         | <b>18,301</b> | <b>17.23</b> | <b>1.36 (1.34, 1.38)</b> | <b>16,228</b> | <b>16.35</b> | <b>1.29 (1.27, 1.32)</b> | <b>7,804</b> | <b>14.23</b> | <b>1.12 (1.10, 1.15)</b> | <b>2,773</b> | <b>15.54</b> | <b>1.23 (1.18, 1.28)</b> | <b>45,293</b> | <b>12.66</b> |                     |

Note: population size (all and by groups) was based on the mean value of Australian population census (1986, 1991, 1996, 2001, 2006). Reference group: annual average of total suicide in Australia between 1986 and 2005 after adjusting for population changes over years.

Table 2: Suicide rate change over time (population groups and suicide methods)

|                            | RR   | 95% CI     | P-value |
|----------------------------|------|------------|---------|
| All suicide                | 0.99 | 0.99, 0.99 | <0.001  |
| Male                       | 0.99 | 0.99, 0.99 | <0.001  |
| Female                     | 0.99 | 0.99, 0.99 | <0.001  |
| Age 15-34                  | 0.99 | 0.99, 1.00 | <0.001  |
| Age 35-54                  | 1.00 | 0.99, 1.00 | 0.009   |
| Age 55-74                  | 0.97 | 0.97, 0.98 | <0.001  |
| Age 75 & over              | 0.97 | 0.97, 0.98 | <0.001  |
| Urban areas                | 0.99 | 0.99, 0.99 | 0.001   |
| Regional areas             | 1.00 | 0.99, 1.00 | 0.019   |
| Rural & remote areas       | 1.00 | 0.99, 1.00 | 0.022   |
| Firearm                    | 0.93 | 0.93, 0.94 | <0.001  |
| Hanging                    | 1.04 | 1.03, 1.04 | <0.001  |
| Gas and vapour             | 0.99 | 0.98, 0.99 | <0.001  |
| Solid or liquid substances | 0.97 | 0.96, 0.97 | <0.001  |
| Other methods              | 0.98 | 0.98, 0.98 | <0.001  |

RR: Relative Risk. Reference group: suicide in 1986 for each population group.



Table 3: Male suicide rate by firearms change over time (Reference: mean annual male suicide rate in 1986-1990 by each of age groups and types of regions)

| Population group       | Time period | RR   | 95% CI     | P-value |
|------------------------|-------------|------|------------|---------|
| 15-34 yrs              | 2001-2005   | 0.22 | 0.08, 0.36 | <0.001  |
|                        | 1996-2000   | 0.39 | 0.28, 0.51 | <0.001  |
|                        | 1991-1995   | 0.78 | 0.69, 0.87 | <0.001  |
| 35-54 yrs              | 2001-2005   | 0.39 | 0.26, 0.51 | <0.001  |
|                        | 1996-2000   | 0.52 | 0.40, 0.64 | <0.001  |
|                        | 1991-1995   | 0.83 | 0.72, 0.94 | 0.001   |
| 55-74 yrs              | 2001-2005   | 0.43 | 0.28, 0.57 | <0.001  |
|                        | 1996-2000   | 0.63 | 0.49, 0.76 | <0.001  |
|                        | 1991-1995   | 0.88 | 0.75, 1.01 | 0.049   |
| 75 yrs & over          | 2001-2005   | 0.45 | 0.21, 0.69 | <0.001  |
|                        | 1996-2000   | 0.66 | 0.43, 0.89 | <0.001  |
|                        | 1991-1995   | 0.83 | 0.59, 1.06 | 0.103   |
| Capital cities         | 2001-2005   | 0.33 | 0.21, 0.45 | <0.001  |
|                        | 1996-2000   | 0.46 | 0.35, 0.57 | <0.001  |
|                        | 1991-1995   | 0.78 | 0.69, 0.88 | <0.001  |
| Regional centres       | 2001-2005   | 0.32 | 0.17, 0.48 | <0.001  |
|                        | 1996-2000   | 0.47 | 0.33, 0.61 | <0.001  |
|                        | 1991-1995   | 0.78 | 0.65, 0.90 | <0.001  |
| Rural and remote areas | 2001-2005   | 0.41 | 0.29, 0.53 | <0.001  |
|                        | 1996-2000   | 0.61 | 0.50, 0.72 | <0.001  |
|                        | 1991-1995   | 0.91 | 0.81, 1.00 | 0.048   |

1  
2  
3  
4  
5  
6  
7  
8  
9  
10  
11  
12  
13  
14  
15  
16  
17  
18  
19  
20  
21  
22  
23  
24  
25  
26  
27  
28  
29  
30  
31  
32  
33  
34  
35  
36  
37  
38  
39  
40  
41  
42  
43  
44  
45  
46  
47  
48  
49  
50  
51  
52  
53  
54  
55  
56  
57  
58  
59  
60

Supplemental 1: Time trend of suicide rates by methods, sexes, age groups and urban/rural areas (part 1).

Supplemental 2: Time trend of suicide rates by methods, sexes, age groups and urban/rural areas (part 2).

For peer review only

1  
2  
3  
4  
5  
6  
7  
8  
9  
10  
11  
12  
13  
14  
15  
16  
17  
18  
19  
20  
21  
22  
23  
24  
25  
26  
27  
28  
29  
30  
31  
32  
33  
34  
35  
36  
37  
38  
39  
40  
41  
42  
43  
44  
45  
46  
47  
48  
49  
50  
51  
52  
53  
54  
55  
56  
57  
58  
59  
60

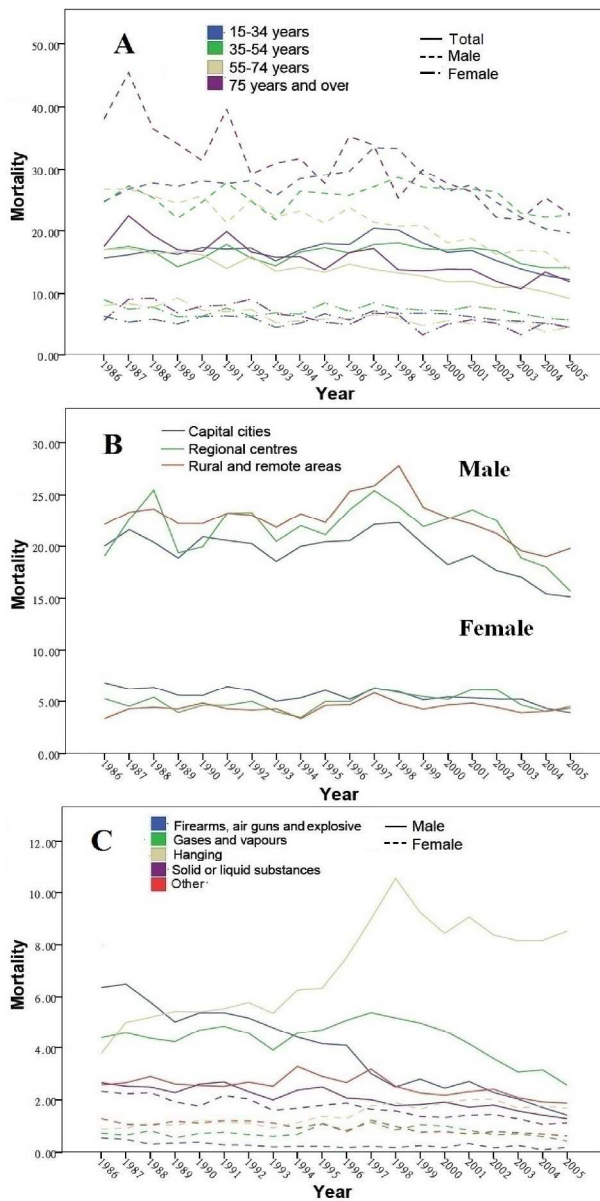

132x258mm (300 x 300 DPI)

1  
2  
3  
4  
5  
6  
7  
8  
9  
10  
11  
12  
13  
14  
15  
16  
17  
18  
19  
20  
21  
22  
23  
24  
25  
26  
27  
28  
29  
30  
31  
32  
33  
34  
35  
36  
37  
38  
39  
40  
41  
42  
43  
44  
45  
46  
47  
48  
49  
50  
51  
52  
53  
54  
55  
56  
57  
58  
59  
60

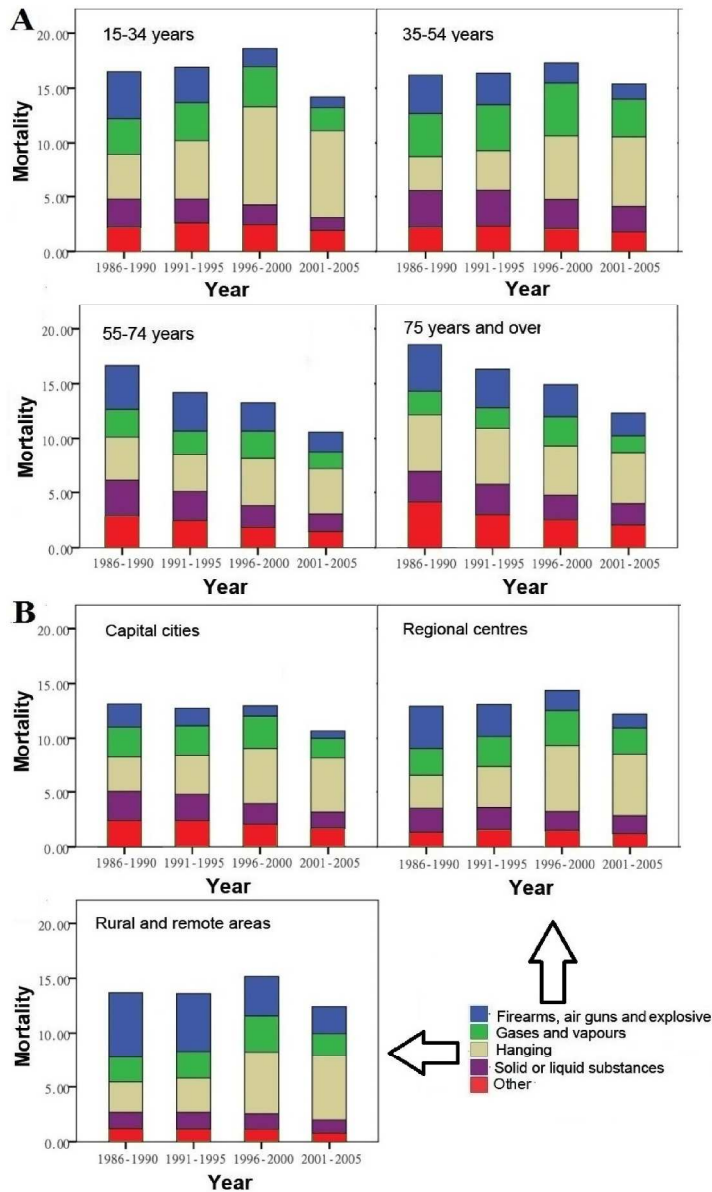

151x255mm (300 x 300 DPI)

1  
2  
3  
4  
5  
6  
7  
8  
9  
10  
11  
12  
13  
14  
15  
16  
17  
18  
19  
20  
21  
22  
23  
24  
25  
26  
27  
28  
29  
30  
31  
32  
33  
34  
35  
36  
37  
38  
39  
40  
41  
42  
43  
44  
45  
46  
47  
48  
49  
50  
51  
52  
53  
54  
55  
56  
57  
58  
59  
60

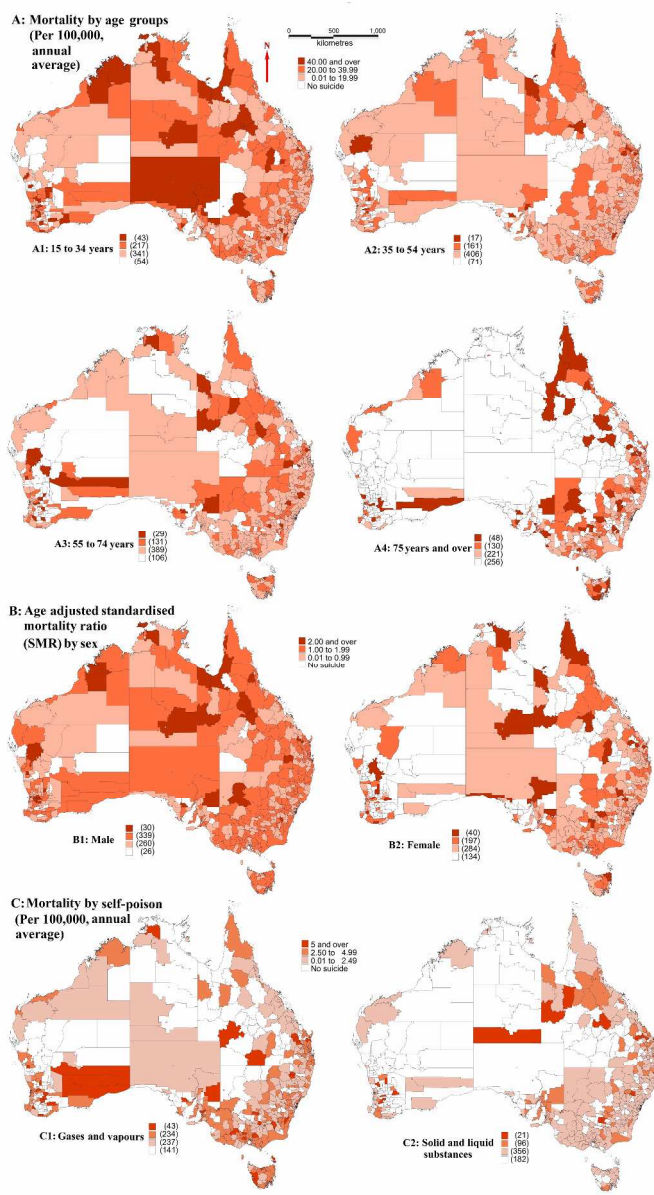

381x635mm (300 x 300 DPI)

1  
2  
3  
4  
5  
6  
7  
8  
9  
10  
11  
12  
13  
14  
15  
16  
17  
18  
19  
20  
21  
22  
23  
24  
25  
26  
27  
28  
29  
30  
31  
32  
33  
34  
35  
36  
37  
38  
39  
40  
41  
42  
43  
44  
45  
46  
47  
48  
49  
50  
51  
52  
53  
54  
55  
56  
57  
58  
59  
60

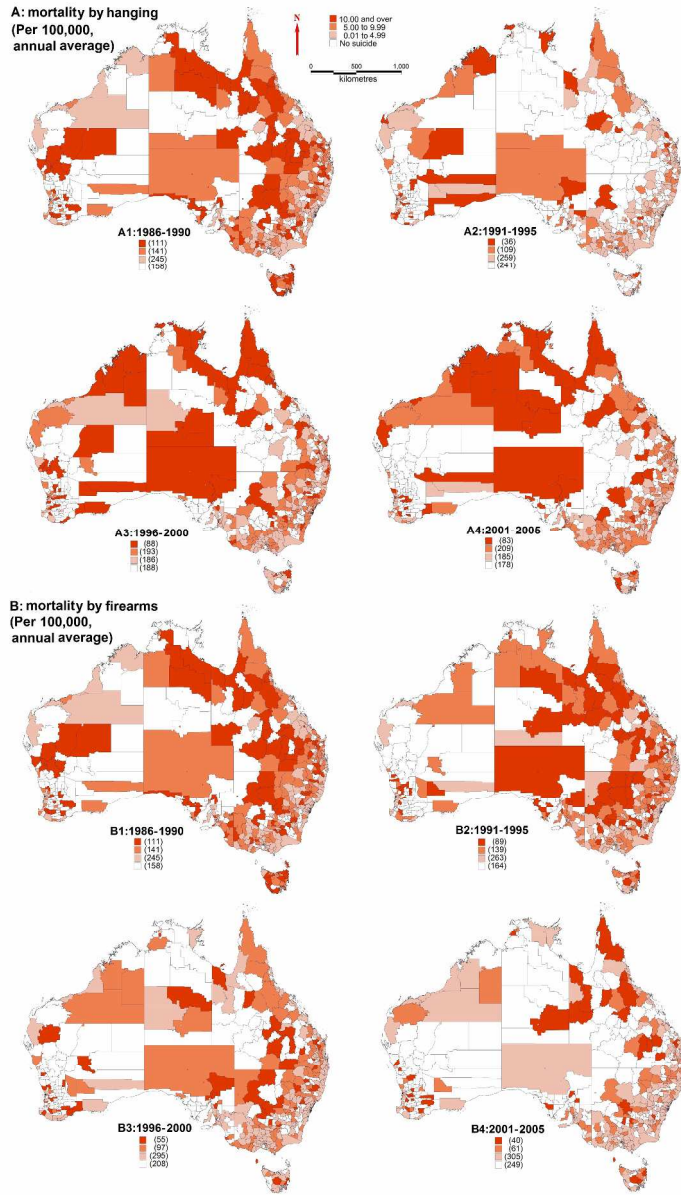

395x635mm (300 x 300 DPI)

1  
2  
3  
4  
5  
6  
7  
8  
9  
10  
11  
12  
13  
14  
15  
16  
17  
18  
19  
20  
21  
22  
23  
24  
25  
26  
27  
28  
29  
30  
31  
32  
33  
34  
35  
36  
37  
38  
39  
40  
41  
42  
43  
44  
45  
46  
47  
48  
49  
50  
51  
52  
53  
54  
55  
56  
57  
58  
59  
60

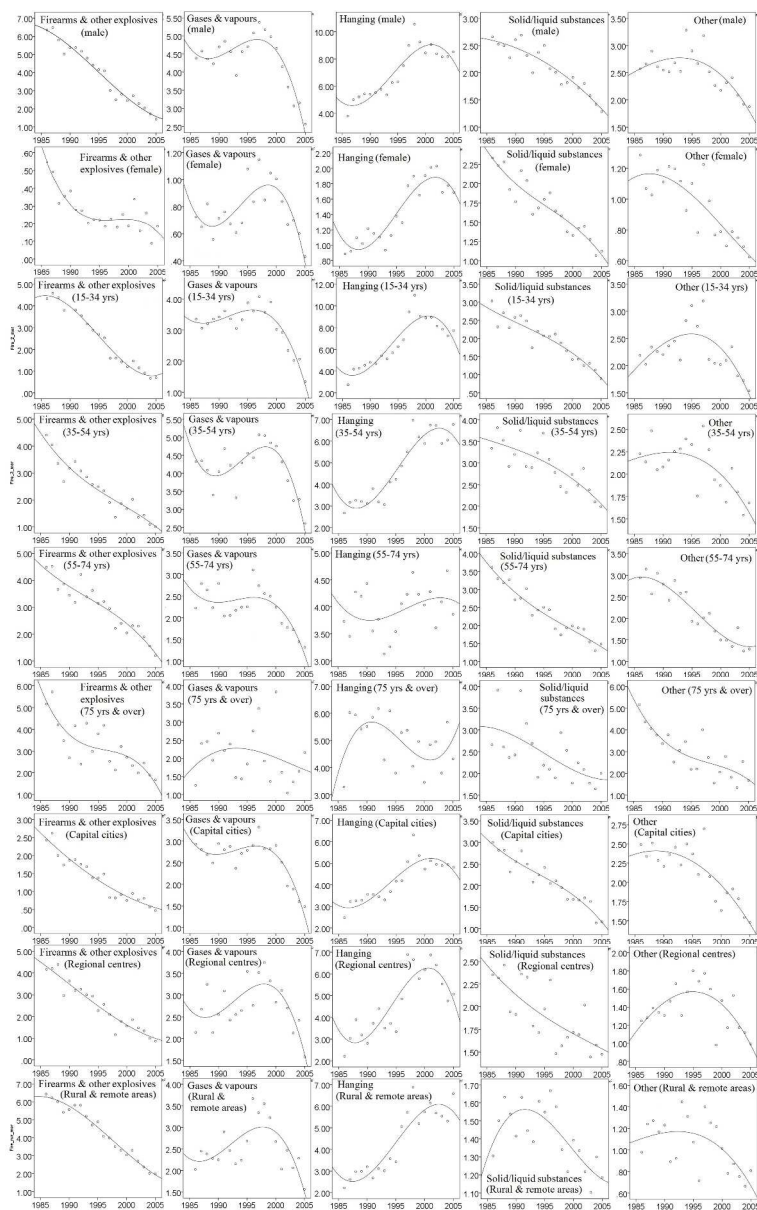

694x1103mm (96 x 96 DPI)

1  
2  
3  
4  
5  
6  
7  
8  
9  
10  
11  
12  
13  
14  
15  
16  
17  
18  
19  
20  
21  
22  
23  
24  
25  
26  
27  
28  
29  
30  
31  
32  
33  
34  
35  
36  
37  
38  
39  
40  
41  
42  
43  
44  
45  
46  
47  
48  
49  
50  
51  
52  
53  
54  
55  
56  
57  
58  
59  
60



552x851mm (96 x 96 DPI)



# BMJ Open

## Dynamic pattern of suicide in Australia, 1986–2005, a descriptive-analytic study

|                                 |                                                                                                                                                                                                                                                                                                                                                                                                                  |
|---------------------------------|------------------------------------------------------------------------------------------------------------------------------------------------------------------------------------------------------------------------------------------------------------------------------------------------------------------------------------------------------------------------------------------------------------------|
| Journal:                        | <i>BMJ Open</i>                                                                                                                                                                                                                                                                                                                                                                                                  |
| Manuscript ID:                  | bmjopen-2014-005311.R2                                                                                                                                                                                                                                                                                                                                                                                           |
| Article Type:                   | Research                                                                                                                                                                                                                                                                                                                                                                                                         |
| Date Submitted by the Author:   | 09-Jul-2014                                                                                                                                                                                                                                                                                                                                                                                                      |
| Complete List of Authors:       | Qi, Xin; Xi'an Jiaotong University, School of Public Health; Queensland University of Technology, School of Public Health and Social Work<br>Hu, Wenbiao ; Queensland University of Technology, School of Public Health and Social Work<br>Page, Andrew; University of Western Sydney, School of Science and Health<br>Tong, Shilu; Queensland University of Technology, School of Public Health and Social Work |
| <b>Primary Subject Heading</b>: | Public health                                                                                                                                                                                                                                                                                                                                                                                                    |
| Secondary Subject Heading:      | Mental health, Epidemiology                                                                                                                                                                                                                                                                                                                                                                                      |
| Keywords:                       | Australia, Suicide, Pattern                                                                                                                                                                                                                                                                                                                                                                                      |
|                                 |                                                                                                                                                                                                                                                                                                                                                                                                                  |

SCHOLARONE™  
Manuscripts

# Dynamic pattern of suicide in Australia, 1986–2005, a descriptive-analytic study

## Author details

Xin Qi<sup>1,2</sup>, Wenbiao Hu<sup>2</sup>, Andrew Page<sup>3</sup>, Shilu Tong<sup>2</sup>

1. Xi'an Jiaotong University, China

2. Queensland University of Technology, Australia

3. University of Western Sydney, Australia

Dr. Xin Qi, School of Public Health, Xi'an Jiaotong University Health Science Center, 76 Yanta Xilu, Xi'an, Shaanxi 710061, China

Tel: +86 188 2944 7238; Email: [chester.qi@yahoo.com](mailto:chester.qi@yahoo.com)

Dr. Wenbiao Hu, School of Public Health and Social Work, Queensland University of Technology, Kelvin Grove, QLD, 4059, Australia

Tel: +61 7 3138 5724; Email: [w2.hu@qut.edu.au](mailto:w2.hu@qut.edu.au)

Prof. Andrew Page, School of Science and Health, University of Western Sydney, Building 24, Room 4.53D, Campbelltown Campus, Locked Bag, 1797, Penrith NSW 2517, Australia

Tel: +61 2 4620 3537; Fax: +61 2 4620 3792; Email: [a.page@uws.edu.au](mailto:a.page@uws.edu.au)

Prof. Shilu Tong, School of Public Health and Social Work, Queensland University of Technology, Kelvin Grove, QLD, 4059, Australia

Tel: +61 7 3138 9745; Fax: +61 7 3138 3369; Email: [s.tong@qut.edu.au](mailto:s.tong@qut.edu.au)

Author for correspondence: Dr. Xin Qi

## ABSTRACT

**Objective:** This study explores the spatiotemporal variations of suicide across Australia from 1986 to 2005, discusses the reasons for dynamic changes, and considers future suicide research and prevention strategies.

**Design:** Suicide (1986–2005) and population data were obtained from the Australian Bureau of Statistics. A series of analyses were conducted to examine the suicide pattern by sex, method and age group over time and geography.

**Results:** Differences in suicide rates across sex, age groups and suicide methods were found across geographical areas. Male suicides were mainly completed by hanging, firearms, gases and self-poisoning. Female suicides were primarily completed by hanging and self-poisoning. Suicide rates were higher in rural areas than urban areas (capital cities and regional centres). Suicide rates by firearms were higher in rural areas than urban areas, while the pattern for self-poisoning showed the reverse. Suicide rates did not fluctuate substantially for the total population and those aged between 15 and 54, while suicide decreased among 55 years and over during the study period. There was a decrease of suicide by firearms during the study period especially after 1996 when new firearm control law was implemented; while suicide by hanging kept continued to increase. Areas with a high proportion of Indigenous population (e.g., northwest of Queensland and top north of Northern Territory) had showed a substantial increase in suicide incidence after 1995.

**Conclusions:** Suicide rates varied over time and space and across sexes, age groups, suicide methods. This study provides detailed patterns of suicide to inform suicide control and prevention strategies for specific sub-groups and areas of high and increased risk.

**Key words:** suicide, Australia, pattern

## STRENGTHS AND LIMITATIONS OF THE STUDY

Different levels of spatial scale were combined to display spatial distribution of suicide patterns; with boundary changes over the period adjusted using advanced GIS methods.

Aggregate data was used. Detailed individual information was not available.

Quality of suicide data may vary over time.

The suicide database may not indicate the trends of suicide after 2005.

## INTRODUCTION

Suicide remains a major public health issue globally, with about 1 million suicide deaths annually.<sup>1</sup> Suicide patterns, including suicide methods, time and geographical variation have been explored in many countries and regions, such as Brazil,<sup>2</sup> China,<sup>3</sup> India,<sup>4</sup> Russia,<sup>5</sup> Taiwan,<sup>6</sup> United Kingdom,<sup>7</sup> and United States.<sup>8</sup> In Australia, suicide rates have fluctuated since suicide registration started in the early of 1920s.<sup>9-11</sup> The trend of annual suicide rates from 1980 was relatively stable (around 9 to 10 per 100,000) except for a peak in 1997 (around 14.6 per 100,000).<sup>9-11</sup> However, there were still approximately 2,000 suicide deaths

1  
2  
3 annually, mainly in male adults (25-54 years age). Thus, it is vital to understand the variations  
4  
5 of suicide patterns over time, space, population groups (age, sex and ethnic groups) and the  
6  
7 possible reasons for these variations, in order to design effective suicide control and  
8  
9 prevention programs. Previous reports and studies have explored suicide patterns in Australia  
10  
11 over time,<sup>9-12</sup> methods<sup>13</sup> and space.<sup>14</sup> From a geographical perspective, the Australian Bureau  
12  
13 of Statistics (ABS) suicide reports covered a long period (1921 to 2010) presented at state and  
14  
15 capital city level.<sup>9-11</sup> However, suicide patterns at the smaller area (e.g., Local Government  
16  
17 Area, or LGA) level, especially in rural and remote areas, were not routinely provided in ABS  
18  
19 reports. A study by Cheung et al examined the spatial pattern of suicide in Australia after  
20  
21 2000.<sup>15</sup> However, this study did not examine suicide pattern before 2000 or by suicide  
22  
23 methods; thus the dynamic spatial pattern of suicide and high risk areas of suicide by  
24  
25 particular method (e.g., firearms) could not be demonstrated. ABS reports indicated that most  
26  
27 suicide occur in urban areas in Australia, while fewer suicides were recorded in rural and  
28  
29 remote areas, areas of lower population density. It is therefore important to select suitable  
30  
31 spatial scales in examining the geographic pattern of suicide in Australia. The studies of  
32  
33 spatial patterns of suicide in earlier years (e.g. before 1995) used relative large spatial scales  
34  
35 (e.g., Statistical Division rather than LGA), which may mask the spatial variation of suicide in  
36  
37 some rural areas (e.g., in Western Australia and Northern Territory) due to their large  
38  
39 geographic size.<sup>16 17</sup> The spatial patterns of suicide by different population groups and suicide  
40  
41 methods over the long term covering both earlier years (e.g., before 2000) and more recent  
42  
43 years (after 2000) using suitable spatial scales (e.g., LGA) have not yet been examined.  
44  
45 Trends in suicide rates over time are likely to differ across population groups (e.g., young or  
46  
47 older adults) and area (e.g., suicide by firearms in urban or rural areas). Thus, this study  
48  
49 examined long-term (both dynamic and static), spatiotemporal patterns of Australian national  
50  
51 suicide, using a range of different combinations of age, time, method, and location from the  
52  
53 period 1986-2005.  
54  
55  
56  
57  
58  
59  
60

## DESIGN

### Data source

Unit record data of suicide deaths between 1986 and 2005 were obtained from the Australian Bureau of Statistics (ABS), including sex, International Classification of Disease (ICD) Code (ICD 9: 950.0-959.9; ICD 10: X60-X84)<sup>18 19</sup> relating to suicide or self-inflicted injury, age, country of birth, date of suicide and Statistical Local Area (SLA) code for place of suicide occurrence. Access to unit record suicide for these variables from the ABS after 2005 was not possible, as the related procedure is under review. As SLA boundaries have changed dramatically over the study period, especially in urban areas, we chose Local Governmental Area (LGA) as the standard geographical unit to explore the spatial pattern of suicide. Choosing LGA as the spatial scale also aims to keep the balance between including sufficient case numbers of suicide in each geographical unit and using too large a geographical unit. Each LGA is composed of one or more SLAs, and LGA boundaries are relatively stable over the study period. The Australian Standard Geographical Classification (ASGC), updated annually, was used to incorporate SLA codes into LGA codes, examine and adjust for SLA/LGA boundary changes over time. CDATA 2001, a product issued by ABS, provided digital boundaries and socio-demographic data of Australia (including 1991, 1996 and 2001 population census data at SLA/LGA levels, based on 2001 Census boundary) and was applied in MapInfo 10.5 software package for map display.<sup>20</sup> Population data (SLA/LGA levels) in 1986 and 2006 Censuses from ABS were merged with 2001 Census data after adjustment for boundary changes using ASGC references. The suicide rates in different groups over time and across LGAs were then calculated. In this study, we categorized LGAs as: metropolitan areas of capital cities, regional centres (other LGA named as “city” outside of capital cities, e.g., City of Townville), or rural and remote areas (remaining LGAs).

1  
2  
3 Most areas in South Australia (SA) and Northern Territory (NT) have a very low population  
4 density and were defined as unincorporated areas by ABS at the LGA level. However, these  
5 areas were also composed of 27 SLAs according to the 2001 Census data. Thus we applied  
6 SLA data in unincorporated areas in SA and NT to provide more detailed geographic  
7 information. In the 2001 Census, Australia was divided into 628 LGAs, plus 27 SLAs in the  
8 unincorporated areas of SA and NT. Ethical approval was granted by the Human Research  
9 Ethics Committee, Queensland University of Technology.  
10  
11  
12  
13  
14  
15  
16  
17  
18

### 19 **Statistical analyses**

20  
21  
22 Descriptive and mapping approaches were applied to explore the age, sex, method, time and  
23 regional-specific patterns of suicide cases and rates. Firstly, we explored the basic pattern of  
24 suicide among different groups by calculating suicide rates, Rate Ratios and 95% Confidence  
25 Interval (CI) to the annual mean national suicide rate over the study period using the annual  
26 average suicide number in the whole Australian population (1986-2005) as reference group.  
27  
28 Temporal trends of suicide rates in population groups were then examined, using yearly data  
29 and Poisson regression, offset by the natural logarithm of the population size and adjusting for  
30 year as a covariate. All the statistical analyses were implemented by SPSS 21.0.<sup>21</sup> Finally  
31 suicide rates at the LGA level were applied to display suicide rates by sex, age group and  
32 method using mapping approaches by MapInfo 10.5.<sup>20</sup> We used the annual average sex-  
33 specific rates for the whole of Australia over the entire study period as the reference to  
34 calculate age-adjusted standardised mortality ratios (SMRs) for both sexes.  
35  
36  
37  
38  
39  
40  
41  
42  
43  
44  
45  
46  
47  
48

### 49 **RESULTS**

50  
51  
52 This study included 45,293 suicide deaths for the 20 year period. Table 1 indicates that most  
53 suicides occurred in those aged between 15 and 54 and occurred in capital cities and regional  
54 centres, as the majority of Australian population live in urban areas. However, suicide rates in  
55  
56  
57  
58  
59  
60

1  
2 rural and remote areas were higher than in urban areas. Approximately 80% of suicides were  
3  
4 males, with the majority of suicides occurring in those aged between 15 and 54 years,  
5  
6 although older males (75-year and over) had higher suicide rates than males in other age  
7  
8 groups. Four methods accounted for the majority of suicides: (1) firearms, air guns and other  
9  
10 explosives (simplified as firearms, 16% of total suicides); (2) hanging (35% of total); (3)  
11  
12 gases and vapours (20% of total); (4) solid or liquid substances (15% of total). The Rate Ratio  
13  
14 and 95% Confident Interval (CI) of suicide in each population group and by different methods  
15  
16 were calculated, using annual average suicide incidence in the study period in Australia as a  
17  
18 reference (Table 1). We also applied Chi square test to assess the distribution of suicide cases  
19  
20 by population groups and method (all differences were statistically significant).  
21  
22  
23  
24

25  
26 Table 1 about here  
27

28  
29 Figure 1 shows time-series trends by different groups. There was a peak in the suicide rate  
30  
31 among the total population during the period 1996 to 1998, particularly in males aged from 15  
32  
33 to 34 years (A), males in rural and remote areas (B) and suicide completed by hanging (C). In  
34  
35 the early years of the study period, suicide incidence among 55 years and over was higher  
36  
37 than those below 55 years, however, rates decreased over time and were lower than those of  
38  
39 young and middle aged adults after 2000, particular in males (A). Suicide rates among 15 to  
40  
41 34 years had peaks in 1997 and 1998 (especially for males peaking at approximately 34 per  
42  
43 100,000 and at approximately 21 per 100,000 for total suicide rates) and kept relatively steady  
44  
45 in other years (25 to 28 per 100,000 for males and 14 to 17 per 100,000 for the total  
46  
47 population) (A). In 1986, firearms and other explosives were the most common methods of  
48  
49 suicide in Australia (over 6 per 100,000 among males). However, the rate dropped to around 2  
50  
51 per 100,000 in 2005. By contrast, male suicide rates by hanging rose from 3.8 per 100,000 in  
52  
53 1986 to 9.4 per 100,000 in 2005, after experiencing a peak of 10.6 per 100,000 in 1998 (C).  
54  
55 Suicide rates by hanging in males dropped after 1997 but were still higher than the early years  
56  
57  
58  
59  
60



1  
2  
3 of the study period. Figure 2 used 5-year periods to explore method-specific suicide by age  
4  
5 groups and urban rural differences. Suicide rates by firearms decreased over the study period,  
6  
7 especially among those aged 15 to 54 years and in rural and remote areas (Figure 2A and 2B);  
8  
9 while suicide by hanging increased dramatically and reached a peak during 1996 to 2000,  
10  
11 especially among aged 15-54 years (Figure 2A). For those aged 55 and older, suicide rates by  
12  
13 hanging and firearms remained more stable than for those aged 54 and younger over the study  
14  
15 period. Suicide rates by gases and vapours, solid and liquid substances fluctuated over the  
16  
17 study period among all population groups (Figure 2A and 2B). Further detailed stratification  
18  
19 of suicide incidence trends over time in each population group and suicide methods are  
20  
21 presented in Supplemental 1 and 2. Poisson regression was implemented to examine the time  
22  
23 series trend of suicide rates across population groups and by methods (Table 2). Suicide rates  
24  
25 by sex, 55 years and over, urban residence, and suicide by firearms, solid and liquid  
26  
27 substances decreased over time. However, suicide rates by hanging significantly increased.  
28  
29 Table 3 indicated that male suicide rates by firearms kept decreasing across the whole study  
30  
31 period, especially from period 1991-1995 to period 1996-2000.  
32  
33  
34  
35

36  
37 Figure 1 about here

38  
39 Figure 2 about here

40  
41 Table 2 about here

42  
43 Table 3 about here  
44  
45  
46  
47

48  
49 Figure 3 shows that among 15 to 34 years, the north and central south areas of the Northern  
50  
51 Territory (NT), the northeast and some southern parts of Western Australia (WA), the  
52  
53 northwest and central inland areas of Queensland (QLD) and some inland areas of New South  
54  
55 Wales (NSW) had higher suicide (2A). The patterns were also similar for males (NT, QLD  
56  
57 and WA in B1). Those aged between 35 and 74 had fewer high-risk areas than those aged 15  
58  
59  
60

1  
2  
3 to 34 (A2 and A3). For those aged 75 and over, suicide in northern and inland QLD and a  
4  
5 small number of LGAs in NSW and WA were higher than other areas. Around 40% of total  
6  
7 LGAs and unincorporated SLAs in NT and SA had no suicide data. Compared with males, a  
8  
9 greater number of areas had no female suicide data (2B). Rural and remote areas had lower  
10  
11 rates by self-poisoning than urban areas, except for some LGAs in inland QLD, east SA and  
12  
13 south WA (2C).  
14

15  
16  
17 Figure 3 about here  
18

19  
20 As suicide rates by firearms and by hanging had more significant changes over time than  
21  
22 other methods and by population groups, we also explored whether this trend existed in  
23  
24 spatial scales over time by stratifying the whole study period into four 5-year periods (Figure  
25  
26 4). Figure 4A shows that suicide rates by hanging was low in the early years of study period  
27  
28 (A1), and very few suicides occurred in rural and remote areas in WA, NT, QLD and NSW.  
29  
30 However, the suicide rate by hanging increased in most areas of Australia since 1986. North  
31  
32 of WA, NT and SA, north of QLD and even urban LGAs had much higher suicide rates  
33  
34 between 1996 and 2005 compared with rates in earlier years. Some areas (e.g., Mornington  
35  
36 Shire (MTS) of northwest QLD, Bathurst-Melville (BM) of NT) had dramatic increases in  
37  
38 suicide by hanging. Both of these areas experienced an increase in the number of suicide  
39  
40 cases (especially for suicide by hanging) between 1996 and 2005 (27 in MTS, 23 males and  
41  
42 26 by hanging; 23 in BM, 22 males and 20 by hanging), compared to the period between 1986  
43  
44 and 1995 (4 in MTS, male and 3 by hanging; 3 in BM, male and by hanging). Suicide rates by  
45  
46 hanging in MTS increased from 28.79 (1986-1995, annual average) to 236.32 per 100,000  
47  
48 (1996-2005, annual average); and in BM increased from 14.10 (1986-1995, annual average)  
49  
50 to 86.39 per 100,000 (1996-2005, annual average). However, the trend of suicide by firearms  
51  
52 was opposite to that of suicide by hanging (Figure 4B), especially in SA and NT, north and  
53  
54 inland areas in NSW and QLD, and middle of WA (B1 and B2). In general, unincorporated  
55  
56  
57  
58  
59  
60

1  
2  
3 NT and SA had a greater number of suicide cases after 1996 (123 from 1996 to 2005)  
4  
5 compared with the period before 1996 (22 from 1986-1995).  
6  
7

8 Figure 4 about here  
9

## 10 **DISCUSSION**

11  
12  
13  
14 This study explored suicide patterns for a range of different combinations of age, time,  
15 method, and location in Australia, using both dynamic (trends over time) and static (averages  
16 over the entire study period) approaches. Males accounted for most suicides, and the suicide  
17 rate was higher among young and middle-aged adults, in rural and remote areas, more  
18 commonly by hanging and by firearms. Suicide rate among those aged 55 years and over  
19 declined substantially over the study period, especially for males. Suicide by firearms  
20 decreased during the study period, while suicide by hanging kept increasing, especially in  
21 males and rural and remote areas. The spatial and spatiotemporal patterns of suicide were  
22 consistent with yearly mean and temporal trends of suicide among different groups.  
23  
24  
25  
26  
27  
28  
29  
30  
31  
32  
33

34  
35 Elderly and upper middle-aged adults (55-years and over) usually have more loneliness and  
36 other health issues (e.g., chronic diseases) compared with the younger age population, which  
37 may lead to psychiatric symptoms, e.g., anxiety, sense of hopelessness and despair.<sup>22 23</sup> And  
38 older adults may be less likely to seek psychiatric support when they have relevant symptoms,  
39 especially in earlier years (e.g., before the middle of 1990s).<sup>24</sup> However, suicide rates among  
40 this age group gradually decreased in the study period, especially after 2000, occurring  
41 contemporaneously with an increased use of antidepressants among older adults.<sup>25</sup>  
42 Antidepressants can reduce psychological disorders, e.g., depression, and suicidal behaviours  
43 among the elderly, especially when combined with other interventions (e.g., counselling and  
44 family support).<sup>26</sup> Selective serotonin reuptake inhibitors have less side effects (e.g.,  
45 cardiovascular impairment and drug interactions) than other drugs, and have been widely  
46  
47  
48  
49  
50  
51  
52  
53  
54  
55  
56  
57  
58  
59  
60

1  
2 recommended to older adults from clinics.<sup>27 28</sup> Studies in other countries have also provided  
3  
4 evidence about the protective effect of antidepressants on severe depression and suicidal  
5  
6 behaviour, although treatment of other levels of depression are still not clear.<sup>29 30</sup>  
7  
8  
9

10 Suicide rates by firearms decreased over the study period while suicide by hanging increased,  
11  
12 especially among 54 years and younger. A study in Victoria indicated that a decreased  
13  
14 registration of firearms and lower suicide rates were significantly correlated from 1997 to  
15  
16 2000.<sup>31</sup> Before 1996, the importation of firearms was controlled by the Commonwealth; and  
17  
18 the sales and possession of firearms were regulated by states and territories in Australia.<sup>32</sup>  
19  
20 Some states had lag in progressing firearm control.<sup>33</sup> The Port Arthur Massacre in Tasmania  
21  
22 led to the enactment of The National Firearms Agreement in 1996, regulating firearm sales,  
23  
24 registration, storage and bans on specific types of firearms nationally.<sup>34</sup> Our study found a  
25  
26 sharper decline in male suicide rates by firearms from the period 1991-1995 to the period  
27  
28 1996-2000 than for earlier periods (e.g., period 1991-1995 compared with period 1986-1990),  
29  
30 suggestive of a sustained impact of the firearm law enforcement after 1996.<sup>31</sup> Other studies  
31  
32 have suggested that decreased firearm suicide rates in young adults were accompanied by  
33  
34 rising suicide rates in other methods at the national and local level.<sup>35 36</sup> Our study also found  
35  
36 this trend, especially among males. Similarly, other countries experienced decreases in suicide  
37  
38 rates by firearms and increased suicide rates by hanging over time.<sup>37 38</sup> This may due to  
39  
40 substitution of methods (e.g., hanging) for firearms, especially after 1996 when availability of  
41  
42 firearms dropped in Australia.<sup>39</sup> Suicide rates by firearms in rural areas (with a higher  
43  
44 availability of firearms) remained higher than suicide rates in urban areas. More evidence,  
45  
46 including the interaction between socio-economic changes and suicide methods, still needs to  
47  
48 be assessed, especially for recent years.  
49  
50  
51  
52  
53  
54

55 Only a small percentage of both the population and suicide cases were for those aged 75 and  
56  
57 over, thus many LGAs had no suicides, or a higher suicide rate among older adults, especially  
58  
59  
60

1  
2  
3 in rural and remote areas. Areas with a higher risk of suicide also often have lower socio-  
4 economic status, along with higher proportion of Indigenous population.<sup>14</sup> Our previous study  
5 indicated that Mornington Shire in QLD and Bathurst-Melville in north of NT showed a much  
6 higher suicide risk, proportion of Indigenous population and lower socio-economic status than  
7 the national average, and both were indicated as high risk clusters using spatial cluster  
8 analysis (1999-2003).<sup>14</sup> Suicide by hanging has also increased in Indigenous communities,  
9 similar to other areas and population groups.<sup>38</sup>

10  
11  
12  
13  
14  
15  
16  
17  
18  
19 Misclassification of suicide as the cause of death may also influence results. For example,  
20 Williams et al[REF No.] reported that suicide rates in Queensland from the Queensland  
21 Suicide Register (QSR) were higher than those based on Australian Bureau of Statistics  
22 (ABS) data, with the disparity attributable to information management and definition of  
23 suicidal behaviours.<sup>47</sup> Thus the QLD suicide rate using ABS data was lower than using QSR  
24 database, especially after 2000. However, the ABS had a higher standard for evaluating the  
25 causes of deaths, e.g., complete documents from hospital or police, which confirmed the  
26 accuracy of information of current suicide database.<sup>48</sup> To ensure the consistency of the suicide  
27 data across different states the present study was restricted to ABS suicide data.

28  
29  
30  
31  
32  
33  
34  
35  
36  
37  
38  
39  
40  
41  
42  
43  
44  
45  
46  
47  
48  
49  
50  
51  
52  
53  
54  
55  
56  
57  
58  
59  
60  
61  
62  
63  
64  
65  
66  
67  
68  
69  
70  
71  
72  
73  
74  
75  
76  
77  
78  
79  
80  
81  
82  
83  
84  
85  
86  
87  
88  
89  
90  
91  
92  
93  
94  
95  
96  
97  
98  
99  
100  
101  
102  
103  
104  
105  
106  
107  
108  
109  
110  
111  
112  
113  
114  
115  
116  
117  
118  
119  
120  
121  
122  
123  
124  
125  
126  
127  
128  
129  
130  
131  
132  
133  
134  
135  
136  
137  
138  
139  
140  
141  
142  
143  
144  
145  
146  
147  
148  
149  
150  
151  
152  
153  
154  
155  
156  
157  
158  
159  
160  
161  
162  
163  
164  
165  
166  
167  
168  
169  
170  
171  
172  
173  
174  
175  
176  
177  
178  
179  
180  
181  
182  
183  
184  
185  
186  
187  
188  
189  
190  
191  
192  
193  
194  
195  
196  
197  
198  
199  
200  
201  
202  
203  
204  
205  
206  
207  
208  
209  
210  
211  
212  
213  
214  
215  
216  
217  
218  
219  
220  
221  
222  
223  
224  
225  
226  
227  
228  
229  
230  
231  
232  
233  
234  
235  
236  
237  
238  
239  
240  
241  
242  
243  
244  
245  
246  
247  
248  
249  
250  
251  
252  
253  
254  
255  
256  
257  
258  
259  
260  
261  
262  
263  
264  
265  
266  
267  
268  
269  
270  
271  
272  
273  
274  
275  
276  
277  
278  
279  
280  
281  
282  
283  
284  
285  
286  
287  
288  
289  
290  
291  
292  
293  
294  
295  
296  
297  
298  
299  
300  
301  
302  
303  
304  
305  
306  
307  
308  
309  
310  
311  
312  
313  
314  
315  
316  
317  
318  
319  
320  
321  
322  
323  
324  
325  
326  
327  
328  
329  
330  
331  
332  
333  
334  
335  
336  
337  
338  
339  
340  
341  
342  
343  
344  
345  
346  
347  
348  
349  
350  
351  
352  
353  
354  
355  
356  
357  
358  
359  
360  
361  
362  
363  
364  
365  
366  
367  
368  
369  
370  
371  
372  
373  
374  
375  
376  
377  
378  
379  
380  
381  
382  
383  
384  
385  
386  
387  
388  
389  
390  
391  
392  
393  
394  
395  
396  
397  
398  
399  
400  
401  
402  
403  
404  
405  
406  
407  
408  
409  
410  
411  
412  
413  
414  
415  
416  
417  
418  
419  
420  
421  
422  
423  
424  
425  
426  
427  
428  
429  
430  
431  
432  
433  
434  
435  
436  
437  
438  
439  
440  
441  
442  
443  
444  
445  
446  
447  
448  
449  
450  
451  
452  
453  
454  
455  
456  
457  
458  
459  
460  
461  
462  
463  
464  
465  
466  
467  
468  
469  
470  
471  
472  
473  
474  
475  
476  
477  
478  
479  
480  
481  
482  
483  
484  
485  
486  
487  
488  
489  
490  
491  
492  
493  
494  
495  
496  
497  
498  
499  
500  
501  
502  
503  
504  
505  
506  
507  
508  
509  
510  
511  
512  
513  
514  
515  
516  
517  
518  
519  
520  
521  
522  
523  
524  
525  
526  
527  
528  
529  
530  
531  
532  
533  
534  
535  
536  
537  
538  
539  
540  
541  
542  
543  
544  
545  
546  
547  
548  
549  
550  
551  
552  
553  
554  
555  
556  
557  
558  
559  
560  
561  
562  
563  
564  
565  
566  
567  
568  
569  
570  
571  
572  
573  
574  
575  
576  
577  
578  
579  
580  
581  
582  
583  
584  
585  
586  
587  
588  
589  
590  
591  
592  
593  
594  
595  
596  
597  
598  
599  
600  
601  
602  
603  
604  
605  
606  
607  
608  
609  
610  
611  
612  
613  
614  
615  
616  
617  
618  
619  
620  
621  
622  
623  
624  
625  
626  
627  
628  
629  
630  
631  
632  
633  
634  
635  
636  
637  
638  
639  
640  
641  
642  
643  
644  
645  
646  
647  
648  
649  
650  
651  
652  
653  
654  
655  
656  
657  
658  
659  
660  
661  
662  
663  
664  
665  
666  
667  
668  
669  
670  
671  
672  
673  
674  
675  
676  
677  
678  
679  
680  
681  
682  
683  
684  
685  
686  
687  
688  
689  
690  
691  
692  
693  
694  
695  
696  
697  
698  
699  
700  
701  
702  
703  
704  
705  
706  
707  
708  
709  
710  
711  
712  
713  
714  
715  
716  
717  
718  
719  
720  
721  
722  
723  
724  
725  
726  
727  
728  
729  
730  
731  
732  
733  
734  
735  
736  
737  
738  
739  
740  
741  
742  
743  
744  
745  
746  
747  
748  
749  
750  
751  
752  
753  
754  
755  
756  
757  
758  
759  
760  
761  
762  
763  
764  
765  
766  
767  
768  
769  
770  
771  
772  
773  
774  
775  
776  
777  
778  
779  
780  
781  
782  
783  
784  
785  
786  
787  
788  
789  
790  
791  
792  
793  
794  
795  
796  
797  
798  
799  
800  
801  
802  
803  
804  
805  
806  
807  
808  
809  
810  
811  
812  
813  
814  
815  
816  
817  
818  
819  
820  
821  
822  
823  
824  
825  
826  
827  
828  
829  
830  
831  
832  
833  
834  
835  
836  
837  
838  
839  
840  
841  
842  
843  
844  
845  
846  
847  
848  
849  
850  
851  
852  
853  
854  
855  
856  
857  
858  
859  
860  
861  
862  
863  
864  
865  
866  
867  
868  
869  
870  
871  
872  
873  
874  
875  
876  
877  
878  
879  
880  
881  
882  
883  
884  
885  
886  
887  
888  
889  
890  
891  
892  
893  
894  
895  
896  
897  
898  
899  
900  
901  
902  
903  
904  
905  
906  
907  
908  
909  
910  
911  
912  
913  
914  
915  
916  
917  
918  
919  
920  
921  
922  
923  
924  
925  
926  
927  
928  
929  
930  
931  
932  
933  
934  
935  
936  
937  
938  
939  
940  
941  
942  
943  
944  
945  
946  
947  
948  
949  
950  
951  
952  
953  
954  
955  
956  
957  
958  
959  
960  
961  
962  
963  
964  
965  
966  
967  
968  
969  
970  
971  
972  
973  
974  
975  
976  
977  
978  
979  
980  
981  
982  
983  
984  
985  
986  
987  
988  
989  
990  
991  
992  
993  
994  
995  
996  
997  
998  
999  
1000

Recommendations on future research and public interventions can be proposed based on the results of this study. Firstly, more details (e.g., health and financial status, alcohol and drugs use, and family conflicts history) of suicide victims need to be acquired to help public health policy makers and health workers to design and implement suicide control and prevention strategies targeting particular population groups (e.g., male young adults) and areas (e.g., Indigenous communities). Suicide by firearms remains a significant method especially in rural and remote areas. Gatekeeper education and training in the rural primary healthcare setting may also be an approach in the identification of local vulnerable populations potentially at risk of suicidal behaviour. Education of primary health workers and the general population

1  
2 important in reducing suicidal behaviours,<sup>51-54</sup> and effectiveness of health education programs  
3  
4 needs to be assessed locally. These activities should be explored at a local level, especially in  
5  
6 high risk areas and population groups, to assess and improve the effectiveness of suicide  
7  
8 prevention programs. Socioeconomic variables (e.g., income and unemployment)<sup>55 56</sup> and  
9  
10 environmental factors (e.g., temperature, rainfall)<sup>57-59</sup> also are associated with suicide. The  
11  
12 association of these factors on suicide by geographic markers should also be addressed by  
13  
14 time series analysis and spatial modelling analysis. This study has explored patterns of suicide  
15  
16 across population groups and by suicide methods over time and space, and have shown  
17  
18 important differences by high risk population groups, local areas and specific suicide  
19  
20 methods. Suicide is a complex issue, and cross-sectorial and multi-disciplinary approaches  
21  
22 need to also incorporate this geographic variability in key socio-demographic and behavioural  
23  
24 antecedents.  
25  
26  
27  
28  
29  
30  
31  
32

### 33 **Contributorship statement**

34  
35  
36 Xin Qi designed the study, implemented all statistical analyses and drafted the manuscript.  
37  
38 Shilu Tong conceptualised the idea and revised the study protocol, especially the research  
39  
40 design and data analysis. Wenbiao Hu provided advice on statistical analyses and  
41  
42 interpretation of the results. Andrew Page helped interpreting the results and drafting the  
43  
44 manuscript.  
45  
46  
47

### 48 **Competing interests**

49  
50  
51 We declare that we have no competing interests.  
52  
53

### 54 **Funding**

1  
2  
3 Xin Qi was funded by the QUT Postgraduate Research Award Scholarship, and Shilu Tong  
4  
5 was supported by a NHMRC Research Fellowship (#553043).  
6  
7

### 8 **Data sharing**

9  
10 No additional data available  
11  
12  
13  
14  
15  
16  
17  
18  
19  
20  
21  
22  
23  
24  
25  
26  
27  
28  
29  
30  
31  
32  
33  
34

### 35 **Reference**

- 36  
37  
38 1 World Health Organization (2012) Suicide prevention (SUPRE). Available:  
39 [http://www.who.int/mental\\_health/prevention/suicide/suicideprevent/en/index.html](http://www.who.int/mental_health/prevention/suicide/suicideprevent/en/index.html) (Assessed  
40 08 September 2012)  
41  
42  
43  
44 2 Bando DH, Brunoni AR, Benseñor IM, *et al.* Suicide rates and income in São Paulo and  
45 Brazil: a temporal and spatial epidemiologic analysis from 1996 to 2008. *BMC Psychiatry*  
46 2012;12:127.  
47  
48  
49 3 Phillips MR, Li X, Zhang Y. Suicide rates in China, 1995-99. *Lancet* 2002;359:835–840.  
50  
51  
52 4 Patel V, Ramasundarahettige C, Vijayakumar L, *et al.* Suicide mortality in India: a  
53 nationally representative survey. *Lancet* 2012;379:2343–2351.  
54  
55  
56 5 Pridemore WA, Spivak AL. Patterns of suicide mortality in Russia. *Suicide Life Threat*  
57 *Behav* 2003;33:132–150.  
58  
59  
60

- 1  
2  
3 6 Chang SS, Sterne JA, Wheeler BW, *et al*: Geography of suicide in Taiwan: spatial  
4 patterning and socioeconomic correlates. *Health Place* 2011;17:641–650.  
5  
6  
7 7 Gunnell D, Wheeler B, Chang SS, *et al*. Changes in the geography of suicide in young men:  
8 England and Wales 1981–2005. *J Epidemiol Community Health* 2012;66:536–543.  
9  
10 8 Miller M, Azrael D, Barber C. Suicide mortality in the United States: the importance of  
11 attending to method in understanding population-level disparities in the burden of suicide.  
12 *Annu Rev Public Health* 2012;33:393–408.  
13  
14  
15  
16 9 ABS. 3309.0 *Suicides, Australia, 1921 to 1998*. Australian Bureau of Statistics, Canberra,  
17 Australia, 2000.  
18  
19  
20  
21 10 ABS. 3309.0. *Suicides, Australia, 2005*. Australian Bureau of Statistics, Canberra,  
22 Australia, 2007.  
23  
24  
25 11 ABS. 3309.0. *Suicides, Australia, 2010*. Australian Bureau of Statistics, Canberra,  
26 Australia, 2012.  
27  
28  
29 12 Spittal MJ, Pirkis J, Miller M, *et al*. Declines in the lethality of suicide attempts explain the  
30 decline in suicide deaths in Australia. *PLOS One* 2012;7:e44565.  
31  
32  
33 13 Large MM, Nielssen OB. Suicide in Australia: meta-analysis of rates and methods of  
34 suicide between 1988 and 2007. *Med J Aust* 2010;192:432–437.  
35  
36  
37 14 Qi X, Hu W, Page A, Tong S. Spatial clusters of suicide in Australia. *BMC Psychiatry*,  
38 2012;12:86.  
39  
40  
41 15 Cheung YT, Spittal MJ, Pirkis J, *et al*. Spatial analysis of suicide mortality in Australia:  
42 investigation of metropolitan-rural-remote differentials of suicide risk across states/territories.  
43 *Soc Sci Med* 2012;75:1460–1468.  
44  
45  
46  
47 16 Wilkinson D, Hiller J, Moss J, *et al*. Mortality variation across Australia: descriptive data  
48 for states and territories, and statistical divisions. *Aust N Z J Public Health*, 2000;24:226-233.  
49  
50  
51 17 Burnley IH. Differential and spatial aspects of suicide mortality in New South Wales and  
52 Sydney, 1980 to 1991. *Aust J Public Health*, 1994;18:293-304.  
53  
54  
55 18 WHO. *International Classification of Diseases, 9th revision (ICD-9)*. Geneva: World  
56 Health Organization, 1975.  
57  
58  
59  
60



- 1  
2  
3 19 WHO. *The ICD-10 classification of mental and behavioral disorders*. Geneva: World  
4 Health Organization, 1992.  
5  
6 20 MapInfo Corporation. *MapInfo Professional 10.5 User Guide*. MapInfo Corporation, New  
7 York, United States of America, 2010.  
8  
9  
10 21 Arbuckle JL. *IBM SPSS Amos 21 User's Guide*. IBM Corporation North Castle Drive  
11 Armonk, NY 10504-1785 United States of America, 2012.  
12  
13 22 Loboprabhu S, Molinari V. Severe loneliness in community-dwelling aging adults with  
14 mental illness. *J Psychiatr Pract* 2012;18:20–28.  
15  
16 23 Bekhet AK, Zauszniewski JA. Mental health of elders in retirement communities: is  
17 loneliness a key factor? *Arch Psychiatr Nurs* 2012;26:214–224.  
18  
19 24 Pearson JL, Conwell Y, Lindsay J, *et al*. Elderly suicide: A multi-national view. *Aging*  
20 *Ment Health* 1997;1:107–111.  
21  
22 25 Hall WD, Mant A, Mitchell PB, *et al*. Association between antidepressant prescribing and  
23 suicide in Australia, 1991–2000: trend analysis. *BMJ* 2003;326:1008.  
24  
25 26 Hickie IB, Davenport TA, Naismith SL, *et al*. Treatment of common mental disorders in  
26 Australian general practice. *Med J Aust* 2001;175 Suppl:S25–30.  
27  
28 27 Mackay FR, Dunn NR, Martin RM, *et al*. Newer antidepressants: a comparison of  
29 tolerability in general practice. *Br J Gen Pract* 1999;49:892–896.  
30  
31 28 Preskorn SH. Antidepressant drug selection: criteria and options. *J Clin Psychiatry*  
32 1994;55 Suppl A:6–22.  
33  
34 29 Mojtabai R. The public health impact of antidepressants: an instrumental variable analysis.  
35 *J Affect Disord* 2011;134:188–197.  
36  
37 30 Friedman RA, Leon AC. Expanding the black box - depression, antidepressants, and the  
38 risk of suicide. *N Engl J Med* 2007;356:2343–2346.  
39  
40 31 Ozanne-Smith J, Ashby K, Newstead S, *et al*. Firearm related deaths: the impact of  
41 regulatory reform. *Inj Prev* 2004;10:280–286.  
42  
43  
44  
45  
46  
47  
48  
49  
50  
51  
52  
53  
54  
55  
56  
57  
58  
59  
60

- 1  
2  
3 32 Norberry J, Woolner D, Magarey K. *After Port Arthur - Issues of Gun Control in*  
4 *Australia*. Parliamentary Library Current Issues Brief 16, 1995-96. Department of the  
5 Parliamentary Library, Canberra, Australia, 1996.  
6  
7  
8  
9 33 AMPC. *Australasian Police Ministers' Council (APMC), Special Firearms Meeting,*  
10 *Canberra, 10 May 1996: Resolutions*. Canberra, Australia, 1996.  
11  
12  
13 34 The Library of Congress. Firearms-Control Legislation and Policy: Australia. Available at:  
14 <http://www.loc.gov/law/help/firearms-control/australia.php#Firearms> (Accessed 15 May  
15 2014).  
16  
17  
18  
19 35 Klieve H, Barnes M, De Leo D. Controlling firearms use in Australia: has the 1996 gun  
20 law reform produced the decrease in rates of suicide with this method? *Soc Psychiatry*  
21 *Psychiatr Epidemiol* 2009;44:285–292.  
22  
23  
24 36 McPhedran S, Baker J. Suicide prevention and method restriction: evaluating the impact of  
25 limiting access to lethal means among young Australians. *Arch Suicide Res* 2012;16:135–146.  
26  
27  
28  
29 37 Cent.Dis. Control Prev. Compressed mortality file (underlying cause-of-death). Wide-  
30 Ranging Online Data for Epidemiologic Research (WONDER) database, 2010. Available:  
31 <http://wonder.cdc.gov/mortSQL.html> (Assessed 08 September 2012).  
32  
33  
34  
35 38 Stark C, Hopkins P, Gibbs D, *et al*. Trends in suicide in Scotland 1981-1999: age, method  
36 and geography. *BMC Public Health* 2004;4:49.  
37  
38  
39 39 Wilkinson D, Gunnell D. Comparison of trends in method-specific suicide rates in  
40 Australia and England & Wales, 1968-97. *Aust N Z J Public Health* 2000;24:153–157.  
41  
42  
43 40 Hunter E, Reser J, Baird M, *et al*. *An analysis of suicide in Indigenous communities in*  
44 *North Queensland. The historical cultural and symbolic landscape*. Commonwealth  
45 Department of Health and Aged Care, Australia, 1999.  
46  
47  
48 41 Austin AE, van den Heuvel C, Byard RW. Causes of community suicides among  
49 indigenous South Australians. *J Forensic Leg Med* 2011;18:299–301.  
50  
51  
52  
53 42 Tse R, Sims N, Byard RW. Alcohol ingestion and age of death in hanging suicides. *J*  
54 *Forensic Sci* 2011;56:922–924.  
55  
56  
57  
58  
59  
60

- 1  
2  
3 43 Cantor CH, Baume P. Access to methods of suicide. What impact? *Aust N Z J Psychiatry*  
4 1998;32:8–14.  
5  
6  
7 44 Beautrais A. Risk factors for suicide and attempted suicide among young people. *Aust N Z*  
8 *J Psychiatry* 2000;34:420–436.  
9  
10 45 De Leo D, Svetcic J, Milner A, *et al.* *Suicide in Indigenous populations of Queensland.*  
11 Australian Academic Press, Bowen Hills, Queensland, Australia, 2011.  
12  
13  
14  
15 46 Parker R, Ben-Tovim DI. A study of factors affecting suicide in Aboriginal and 'other'  
16 populations in the Top End of the Northern Territory through an audit of coronial records.  
17 *Aust N Z J Psychiatry* 2002;36:404–410.  
18  
19  
20 47 Williams R, Doessel D, Svetcic J, *et al.* Accuracy of official suicide mortality data in  
21 Queensland. *Aust N Z J Psychiatry* 2010;44:815–822.  
22  
23  
24 48 ABS. 3303.0. *Causes of death, Australia, 2007.* Australian Bureau of Statistics, Canberra,  
25 Australia, 2009.  
26  
27  
28 49 Lester D, Leenaars A. Suicide rates in Canada before and after tightening firearm control  
29 laws. *Psychol Rep* 1993;72:787–790.  
30  
31  
32 50 Ludwig J, Cook PJ. Homicide and suicide rates associated with implementation of the  
33 Brady Handgun Violence Prevention Act. *JAMA* 2000;284:585–591.  
34  
35  
36 51. Rihmer Z, Belso N, Kalmar S. Antidepressants and suicide prevention in Hungary. *Acta*  
37 *Psychiatr Scand* 2001;103:238–239.  
38  
39  
40 52 Jorm AF, Christensen H, Griffiths KM. The impact of beyond blue: the national  
41 depression initiative on the Australian public's recognition of depression and beliefs about  
42 treatments. *Aust N Z J Psychiatry* 2005;39:248–254.  
43  
44  
45 53 Paykel ES, Hart D, Priest RG. Changes in public attitudes to depression during the Defeat  
46 Depression Campaign. *Br J Psychiatry* 1998;173:519–522.  
47  
48  
49 54 Mann JJ, Apter A, Bertolote J, *et al.* Suicide prevention strategies: a systematic review.  
50 *JAMA* 2005;294:2064–2074.  
51  
52  
53 55 Huisman M, Oldehinkel AJ. Income inequality, social capital and self-inflicted injury and  
54 violence-related mortality. *J Epidemiol Community Health* 2009;63:31–37.  
55  
56  
57  
58  
59  
60

1  
2  
3 56 Chan WS, Yip PS, Wong PW, *et al.* Suicide and unemployment: what are the missing  
4 links? *Arch Suicide Res* 2007;11:327–335.

5  
6  
7 57 Lambert G, Reid C, Kaye D, *et al.* Increased suicide rate in the middle-aged and its  
8 association with hours of sunlight. *Am J Psychiatry* 2003;160:793–795.

9  
10  
11 58 Nicholls N, Butler CD, Hanigan I. Inter-annual rainfall variations and suicide in New  
12 South Wales, Australia, 1964–2001. *Int J Biometeorol* 2006;50:139–143.

13  
14  
15 59 Fragar LJ, Gray EJ, Franklin RJ, *et al.* *A picture of health: a preliminary report of the*  
16 *health of country Australians*. The Australian Agricultural Health Unit, P.O. Box 256, Moree,  
17 NSW 2400, Australia, 1997.  
18  
19  
20  
21  
22  
23  
24  
25  
26  
27  
28  
29  
30  
31  
32  
33  
34  
35  
36  
37  
38  
39  
40  
41  
42  
43  
44  
45  
46  
47  
48  
49  
50  
51  
52  
53  
54  
55  
56  
57  
58  
59  
60

Table 1: Suicide deaths and rate (per 100,000) across different groups in Australia (1986-2005)

| Population group                | Age group<br>15 to 34 |       |                        | 35 to 54 |       |                        | 55 to 74 |       |                        | 75 & over |       |                        | All ages |       |                        |
|---------------------------------|-----------------------|-------|------------------------|----------|-------|------------------------|----------|-------|------------------------|-----------|-------|------------------------|----------|-------|------------------------|
|                                 | Cases                 | Rate  | Rate Ratio<br>(95% CI) | Cases    | Rate  | Rate Ratio<br>(95% CI) | Cases    | Rate  | Rate Ratio<br>(95% CI) | Cases     | Rate  | Rate Ratio<br>(95% CI) | Cases    | Rate  | Rate Ratio<br>(95% CI) |
| <b>By sex</b>                   |                       |       |                        |          |       |                        |          |       |                        |           |       |                        |          |       |                        |
| Male                            | 15,059                | 28.29 | 2.23 (2.19, 2.27)      | 12,672   | 25.61 | 2.02 (1.98, 2.06)      | 5,986    | 22.35 | 1.77 (1.72, 1.81)      | 2,091     | 30.98 | 2.45 (2.34, 2.56)      | 35,942   | 20.32 | 1.61 (1.58, 1.63)      |
| Female                          | 3,242                 | 6.12  | 0.48 (0.47, 0.50)      | 3,556    | 7.14  | 0.56 (0.55, 0.58)      | 1,818    | 6.48  | 0.51 (0.49, 0.54)      | 682       | 6.14  | 0.49 (0.45, 0.52)      | 9,351    | 5.17  | 0.41 (0.40, 0.42)      |
| <b>By region</b>                |                       |       |                        |          |       |                        |          |       |                        |           |       |                        |          |       |                        |
| Capital cities                  | 11,267                | 16.28 | 1.29 (1.26, 1.31)      | 9,736    | 15.68 | 1.24 (1.21, 1.27)      | 4,568    | 14.21 | 1.12 (1.09, 1.16)      | 1,674     | 15.45 | 1.22 (1.16, 1.28)      | 27,332   | 12.32 | 0.97 (0.96, 0.99)      |
| Regional centres                | 3,423                 | 17.57 | 1.39 (1.34, 1.44)      | 3,269    | 17.72 | 1.40 (1.35, 1.45)      | 1,550    | 13.65 | 1.03 (1.03, 1.14)      | 584       | 15.96 | 1.26 (1.16, 1.37)      | 8869     | 12.86 | 1.02 (1.00, 1.04)      |
| Rural & remote areas            | 3,611                 | 20.58 | 1.63 (1.57, 1.68)      | 3,223    | 17.23 | 1.36 (1.31, 1.41)      | 1,686    | 14.88 | 1.18 (1.12, 1.23)      | 515       | 15.37 | 1.21 (1.11, 1.32)      | 9092     | 13.55 | 1.07 (1.05, 1.09)      |
| <b>By methods</b>               |                       |       |                        |          |       |                        |          |       |                        |           |       |                        |          |       |                        |
| Firearms & other explosives     | 2,795                 | 2.63  | 0.21 (0.20, 0.22)      | 2,285    | 2.30  | 0.18 (0.18, 0.19)      | 1,674    | 3.05  | 0.24 (0.23, 0.25)      | 556       | 3.11  | 0.25 (0.23, 0.27)      | 7,348    | 2.07  | 0.16 (0.16, 0.17)      |
| Gases & vapours                 | 3,457                 | 3.25  | 0.26 (0.25, 0.27)      | 4,104    | 4.13  | 0.33 (0.32, 0.34)      | 1,277    | 2.33  | 0.18 (0.17, 0.20)      | 375       | 2.10  | 0.17 (0.15, 0.18)      | 9,214    | 2.60  | 0.20 (0.20, 0.21)      |
| Hanging                         | 7,366                 | 6.93  | 0.55 (0.54, 0.56)      | 4,927    | 4.96  | 0.39 (0.38, 0.41)      | 2,301    | 4.20  | 0.33 (0.32, 0.35)      | 901       | 5.05  | 0.40 (0.37, 0.43)      | 15,620   | 4.40  | 0.35 (0.34, 0.35)      |
| Solid or liquid substances      | 2,166                 | 2.04  | 0.16 (0.16, 0.17)      | 2,863    | 2.88  | 0.23 (0.22, 0.24)      | 1,333    | 2.43  | 0.19 (0.18, 0.20)      | 434       | 2.43  | 0.19 (0.18, 0.21)      | 6,807    | 1.92  | 0.15 (0.15, 0.15)      |
| Other                           | 2,517                 | 1.26  | 0.19 (0.18, 0.20)      | 2,049    | 2.06  | 0.16 (0.16, 0.17)      | 1,219    | 2.22  | 0.18 (0.17, 0.19)      | 507       | 2.84  | 0.23 (0.21, 0.25)      | 6,294    | 1.78  | 0.14 (0.14, 0.14)      |
| <b>By region and by sex</b>     |                       |       |                        |          |       |                        |          |       |                        |           |       |                        |          |       |                        |
| Male                            |                       |       |                        |          |       |                        |          |       |                        |           |       |                        |          |       |                        |
| Capital cities                  | 9,072                 | 26.66 | 2.08 (2.03, 2.13)      | 7,439    | 24.59 | 1.92 (1.87, 1.97)      | 3,358    | 21.86 | 1.71 (1.65, 1.77)      | 1,179     | 30.02 | 2.35 (2.22, 2.49)      | 21,107   | 19.63 | 1.53 (1.51, 1.56)      |
| Regional centres                | 2,868                 | 29.90 | 2.33 (2.25, 2.42)      | 2,593    | 28.60 | 2.23 (2.15, 2.32)      | 1,213    | 22.21 | 1.74 (1.64, 1.84)      | 468       | 32.80 | 2.57 (2.35, 2.81)      | 7,173    | 21.39 | 1.67 (1.63, 1.71)      |
| Rural/remote areas              | 3,119                 | 32.46 | 2.72 (2.62, 2.82)      | 2,640    | 25.99 | 2.16 (2.08, 2.24)      | 1,415    | 23.73 | 1.94 (1.84, 2.04)      | 444       | 31.82 | 2.60 (2.37, 2.85)      | 7,662    | 21.39 | 1.77 (1.73, 1.82)      |
| Female                          |                       |       |                        |          |       |                        |          |       |                        |           |       |                        |          |       |                        |
| Capital cities                  | 2,195                 | 6.40  | 0.50 (0.48, 0.52)      | 2,297    | 7.39  | 0.58 (0.55, 0.60)      | 1,210    | 7.33  | 0.57 (0.54, 0.61)      | 495       | 7.26  | 0.57 (0.52, 0.62)      | 6,225    | 5.58  | 0.44 (0.42, 0.45)      |
| Regional centres                | 555                   | 5.75  | 0.45 (0.42, 0.49)      | 676      | 7.37  | 0.58 (0.53, 0.62)      | 337      | 5.83  | 0.46 (0.41, 0.51)      | 116       | 5.27  | 0.41 (0.34, 0.50)      | 1,696    | 4.91  | 0.38 (0.37, 0.40)      |
| Rural/remote areas              | 492                   | 5.43  | 0.43 (0.39, 0.47)      | 583      | 6.12  | 0.51 (0.47, 0.55)      | 271      | 4.71  | 0.39 (0.34, 0.43)      | 71        | 3.41  | 0.28 (0.22, 0.35)      | 1,430    | 4.13  | 0.34 (0.33, 0.36)      |
| <b>By methods and by region</b> |                       |       |                        |          |       |                        |          |       |                        |           |       |                        |          |       |                        |
| Capital cities                  |                       |       |                        |          |       |                        |          |       |                        |           |       |                        |          |       |                        |
| Firearms & other explosives     | 1,148                 | 1.66  | 0.13 (0.12, 0.14)      | 913      | 1.47  | 0.12 (0.11, 0.12)      | 626      | 1.95  | 0.15 (0.14, 0.17)      | 211       | 1.95  | 0.16 (0.14, 0.18)      | 2,908    | 1.31  | 0.10 (0.10, 0.11)      |
| Gases & vapours                 | 2,299                 | 3.32  | 0.26 (0.25, 0.27)      | 2,420    | 3.90  | 0.31 (0.30, 0.32)      | 732      | 2.28  | 0.18 (0.17, 0.19)      | 222       | 2.05  | 0.16 (0.14, 0.19)      | 5,674    | 2.56  | 0.20 (0.20, 0.21)      |
| Hanging                         | 4,339                 | 6.27  | 0.50 (0.48, 0.51)      | 3,017    | 4.86  | 0.38 (0.37, 0.40)      | 1,470    | 4.57  | 0.36 (0.34, 0.38)      | 591       | 5.45  | 0.43 (0.40, 0.47)      | 9,478    | 4.27  | 0.30 (0.30, 0.31)      |
| Solid or liquid substances      | 1,547                 | 2.24  | 0.18 (0.17, 0.19)      | 1,864    | 3.00  | 0.24 (0.23, 0.25)      | 901      | 2.80  | 0.22 (0.21, 0.24)      | 284       | 2.62  | 0.21 (0.19, 0.23)      | 4,600    | 2.07  | 0.16 (0.16, 0.17)      |
| Other                           | 1,934                 | 2.79  | 0.22 (0.21, 0.23)      | 1,522    | 2.45  | 0.19 (0.18, 0.20)      | 839      | 2.61  | 0.21 (0.19, 0.22)      | 366       | 3.38  | 0.27 (0.24, 0.30)      | 4,672    | 2.11  | 0.17 (0.16, 0.17)      |
| Regional centres                |                       |       |                        |          |       |                        |          |       |                        |           |       |                        |          |       |                        |
| Firearms & other explosives     | 603                   | 3.09  | 0.25 (0.23, 0.27)      | 495      | 2.68  | 0.21 (0.20, 0.23)      | 368      | 3.24  | 0.26 (0.23, 0.28)      | 131       | 3.58  | 0.28 (0.24, 0.33)      | 1,606    | 2.33  | 0.19 (0.18, 0.19)      |
| Gases & vapours                 | 631                   | 3.24  | 0.26 (0.24, 0.28)      | 861      | 4.67  | 0.37 (0.35, 0.40)      | 275      | 2.42  | 0.19 (0.17, 0.22)      | 91        | 2.49  | 0.20 (0.16, 0.24)      | 1,858    | 2.70  | 0.21 (0.20, 0.22)      |
| Hanging                         | 1,502                 | 7.71  | 0.61 (0.58, 0.64)      | 1,026    | 5.56  | 0.44 (0.41, 0.47)      | 456      | 4.02  | 0.32 (0.29, 0.35)      | 187       | 5.11  | 0.40 (0.35, 0.46)      | 3,200    | 4.65  | 0.37 (0.36, 0.38)      |
| Solid or liquid substances      | 344                   | 1.77  | 0.14 (0.13, 0.16)      | 570      | 3.09  | 0.25 (0.23, 0.27)      | 258      | 2.27  | 0.18 (0.16, 0.20)      | 92        | 2.51  | 0.20 (0.16, 0.24)      | 1,268    | 1.84  | 0.15 (0.14, 0.15)      |
| Other                           | 343                   | 1.76  | 0.14 (0.13, 0.16)      | 317      | 1.72  | 0.14 (0.12, 0.15)      | 193      | 1.70  | 0.14 (0.12, 0.16)      | 83        | 2.27  | 0.18 (0.15, 0.22)      | 937      | 1.36  | 0.11 (0.10, 0.12)      |

1  
2  
3  
4  
5  
6  
7  
8  
9  
10  
11  
12  
13  
14  
15  
16  
17  
18  
19  
20  
21  
22  
23  
24  
25  
26  
27  
28  
29  
30  
31  
32  
33  
34  
35  
36  
37  
38  
39  
40  
41  
42  
43  
44  
45  
46  
47  
48  
49

Table 1: Suicide deaths and rate (per 100,000) across different groups in Australia (1986-2005, continued)

| Population group             | Age group     |              |                          | 35 to 54      |              |                          | 55 to 74     |              |                          | 75 & over    |              |                          | All ages      |              |                     |
|------------------------------|---------------|--------------|--------------------------|---------------|--------------|--------------------------|--------------|--------------|--------------------------|--------------|--------------|--------------------------|---------------|--------------|---------------------|
|                              | Cases         | Rate         | Rate Ratio (95% CI)      | Cases         | Rate         | Rate Ratio (95% CI)      | Cases        | Rate         | Rate Ratio (95% CI)      | Cases        | Rate         | Rate Ratio (95% CI)      | Cases         | Rate         | Rate Ratio (95% CI) |
| <b>Rural/remote areas</b>    |               |              |                          |               |              |                          |              |              |                          |              |              |                          |               |              |                     |
| Firearms & other explosives  | 1,044         | 5.95         | 0.47 (0.44, 0.50)        | 877           | 4.69         | 0.37 (0.35, 0.40)        | 680          | 6.00         | 0.48 (0.44, 0.51)        | 214          | 6.39         | 0.51 (0.44, 0.52)        | 2,834         | 4.22         | 0.33 (0.32, 0.35)   |
| Gases & vapours              | 527           | 3.00         | 0.24 (0.22, 0.26)        | 823           | 4.40         | 0.35 (0.33, 0.37)        | 270          | 2.38         | 0.19 (0.17, 0.21)        | 62           | 1.85         | 0.15 (0.11, 0.19)        | 1,682         | 2.51         | 0.20 (0.19, 0.21)   |
| Hanging                      | 1,525         | 8.69         | 0.69 (0.65, 0.72)        | 884           | 4.73         | 0.37 (0.35, 0.40)        | 375          | 3.31         | 0.26 (0.24, 0.29)        | 123          | 3.67         | 0.29 (0.24, 0.35)        | 2,942         | 4.38         | 0.35 (0.33, 0.36)   |
| Solid or liquid substances   | 275           | 1.57         | 0.12 (0.11, 0.14)        | 429           | 2.29         | 0.18 (0.17, 0.20)        | 174          | 1.54         | 0.12 (0.11, 0.14)        | 58           | 1.73         | 0.14 (0.11, 0.18)        | 939           | 1.40         | 0.11 (0.10, 0.12)   |
| Other                        | 240           | 1.37         | 0.11 (0.10, 0.12)        | 210           | 1.12         | 0.09 (0.08, 0.10)        | 187          | 1.65         | 0.13 (0.11, 0.15)        | 58           | 1.73         | 0.14 (0.11, 0.18)        | 695           | 1.04         | 0.08 (0.08, 0.09)   |
| <b>By methods and by sex</b> |               |              |                          |               |              |                          |              |              |                          |              |              |                          |               |              |                     |
| <b>Male</b>                  |               |              |                          |               |              |                          |              |              |                          |              |              |                          |               |              |                     |
| Firearms & other explosives  | 2,555         | 4.80         | 0.38 (0.37, 0.40)        | 2,123         | 4.29         | 0.34 (0.33, 0.36)        | 1,605        | 5.99         | 0.48 (0.45, 0.50)        | 551          | 8.16         | 0.65 (0.60, 0.70)        | 6,869         | 3.88         | 0.31 (0.30, 0.32)   |
| Gases & vapours              | 2,961         | 5.56         | 0.44 (0.42, 0.46)        | 3,428         | 6.93         | 0.55 (0.53, 0.57)        | 1,091        | 4.07         | 0.32 (0.30, 0.34)        | 324          | 4.80         | 0.38 (0.34, 0.43)        | 7,805         | 4.41         | 0.35 (0.34, 0.36)   |
| Hanging                      | 6,267         | 11.77        | 0.93 (0.91, 0.96)        | 4,115         | 8.32         | 0.66 (0.64, 0.68)        | 1,821        | 6.80         | 0.54 (0.51, 0.56)        | 670          | 9.93         | 0.79 (0.73, 0.85)        | 12,963        | 7.33         | 0.58 (0.57, 0.59)   |
| Solid or liquid substances   | 1,301         | 2.44         | 0.19 (0.18, 0.20)        | 1,573         | 3.18         | 0.25 (0.24, 0.27)        | 671          | 2.51         | 0.20 (0.18, 0.21)        | 198          | 2.93         | 0.23 (0.20, 0.27)        | 3,746         | 2.12         | 0.17 (0.16, 0.17)   |
| Other                        | 1,975         | 3.72         | 0.29 (0.28, 0.31)        | 1,433         | 2.89         | 0.23 (0.22, 0.24)        | 798          | 2.98         | 0.24 (0.22, 0.25)        | 348          | 5.16         | 0.41 (0.37, 0.46)        | 4,559         | 2.58         | 0.20 (0.20, 0.21)   |
| <b>Female</b>                |               |              |                          |               |              |                          |              |              |                          |              |              |                          |               |              |                     |
| Firearms & other explosives  | 240           | 0.45         | 0.04 (0.03, 0.04)        | 162           | 0.33         | 0.03 (0.02, 0.03)        | 69           | 0.25         | 0.02 (0.02, 0.03)        | 5            | 0.05         | 0.00 (0.00, 0.01)        | 479           | 0.26         | 0.02 (0.02, 0.02)   |
| Gases & vapours              | 496           | 0.94         | 0.07 (0.07, 0.08)        | 676           | 1.36         | 0.11 (0.10, 0.12)        | 186          | 0.66         | 0.05 (0.05, 0.06)        | 51           | 0.46         | 0.04 (0.03, 0.05)        | 1,409         | 0.78         | 0.06 (0.06, 0.07)   |
| Hanging                      | 1,099         | 2.07         | 0.16 (0.15, 0.17)        | 812           | 1.63         | 0.12 (0.11, 0.13)        | 480          | 1.71         | 0.14 (0.12, 0.15)        | 231          | 2.08         | 0.17 (0.15, 0.19)        | 2,657         | 1.47         | 0.12 (0.11, 0.12)   |
| Solid or liquid substances   | 865           | 1.63         | 0.13 (0.12, 0.14)        | 1,290         | 2.59         | 0.21 (0.19, 0.22)        | 662          | 2.36         | 0.19 (0.17, 0.20)        | 236          | 2.13         | 0.17 (0.15, 0.19)        | 3,061         | 1.69         | 0.13 (0.13, 0.14)   |
| Other                        | 542           | 1.03         | 0.08 (0.07, 0.09)        | 616           | 1.23         | 0.10 (0.09, 0.11)        | 421          | 1.50         | 0.12 (0.11, 0.13)        | 163          | 1.42         | 0.12 (0.10, 0.14)        | 1,745         | 0.97         | 0.08 (0.07, 0.08)   |
| <b>Total suicide</b>         | <b>18,301</b> | <b>17.23</b> | <b>1.36 (1.34, 1.38)</b> | <b>16,228</b> | <b>16.35</b> | <b>1.29 (1.27, 1.32)</b> | <b>7,804</b> | <b>14.23</b> | <b>1.12 (1.10, 1.15)</b> | <b>2,773</b> | <b>15.54</b> | <b>1.23 (1.18, 1.28)</b> | <b>45,293</b> | <b>12.66</b> |                     |

Note: population size (all and by groups) was based on the mean value of Australian population census (1986, 1991, 1996, 2001, 2006). Reference group: annual average of total suicide in Australia between 1986 and 2005 after adjusting for population changes over years.

Table 2: Suicide rate change over time (population groups and suicide methods)

|                            | RR   | 95% CI     | P-value |
|----------------------------|------|------------|---------|
| All suicide                | 0.99 | 0.99, 0.99 | <0.001  |
| Male                       | 0.99 | 0.99, 0.99 | <0.001  |
| Female                     | 0.99 | 0.99, 0.99 | <0.001  |
| Age 15-34                  | 0.99 | 0.99, 1.00 | <0.001  |
| Age 35-54                  | 1.00 | 0.99, 1.00 | 0.009   |
| Age 55-74                  | 0.97 | 0.97, 0.98 | <0.001  |
| Age 75 & over              | 0.97 | 0.97, 0.98 | <0.001  |
| Urban areas                | 0.99 | 0.99, 0.99 | 0.001   |
| Regional areas             | 1.00 | 0.99, 1.00 | 0.019   |
| Rural & remote areas       | 1.00 | 0.99, 1.00 | 0.022   |
| Firearm                    | 0.93 | 0.93, 0.94 | <0.001  |
| Hanging                    | 1.04 | 1.03, 1.04 | <0.001  |
| Gas and vapour             | 0.99 | 0.98, 0.99 | <0.001  |
| Solid or liquid substances | 0.97 | 0.96, 0.97 | <0.001  |
| Other methods              | 0.98 | 0.98, 0.98 | <0.001  |

RR: Relative Risk. Reference group: suicide in 1986 for each population group.

Table 3: Male suicide rate by firearms change over time (Reference: mean annual male suicide rate in 1986-1990 by each of age groups and types of regions)

| Population group       | Time period | RR   | 95% CI     | P-value |
|------------------------|-------------|------|------------|---------|
| 15-34 yrs              | 2001-2005   | 0.22 | 0.08, 0.36 | <0.001  |
|                        | 1996-2000   | 0.39 | 0.28, 0.51 | <0.001  |
|                        | 1991-1995   | 0.78 | 0.69, 0.87 | <0.001  |
| 35-54 yrs              | 2001-2005   | 0.39 | 0.26, 0.51 | <0.001  |
|                        | 1996-2000   | 0.52 | 0.40, 0.64 | <0.001  |
|                        | 1991-1995   | 0.83 | 0.72, 0.94 | 0.001   |
| 55-74 yrs              | 2001-2005   | 0.43 | 0.28, 0.57 | <0.001  |
|                        | 1996-2000   | 0.63 | 0.49, 0.76 | <0.001  |
|                        | 1991-1995   | 0.88 | 0.75, 1.01 | 0.049   |
| 75 yrs & over          | 2001-2005   | 0.45 | 0.21, 0.69 | <0.001  |
|                        | 1996-2000   | 0.66 | 0.43, 0.89 | <0.001  |
|                        | 1991-1995   | 0.83 | 0.59, 1.06 | 0.103   |
| Capital cities         | 2001-2005   | 0.33 | 0.21, 0.45 | <0.001  |
|                        | 1996-2000   | 0.46 | 0.35, 0.57 | <0.001  |
|                        | 1991-1995   | 0.78 | 0.69, 0.88 | <0.001  |
| Regional centres       | 2001-2005   | 0.32 | 0.17, 0.48 | <0.001  |
|                        | 1996-2000   | 0.47 | 0.33, 0.61 | <0.001  |
|                        | 1991-1995   | 0.78 | 0.65, 0.90 | <0.001  |
| Rural and remote areas | 2001-2005   | 0.41 | 0.29, 0.53 | <0.001  |
|                        | 1996-2000   | 0.61 | 0.50, 0.72 | <0.001  |
|                        | 1991-1995   | 0.91 | 0.81, 1.00 | 0.048   |



**FIGURE LEGENDS**

Figure 1: suicide rates over time and sub-groups (per 100,000)

A: Sex and age groups; B: Sex and urban rural differences; C: Sex and methods;

Figure 2: suicide rates over time and methods (per 100,000, annual average)

A: Methods and age groups; B: Methods and urban rural difference

Figure 3: Suicide rates among different groups across Australia (1986-2005)

Figure 4: Suicide rates by self-harm over time and across space in Australia (1986-2005)

Supplemental 1: Time trend of suicide rates by methods, sexes, age groups and urban/rural areas (part 1).

Supplemental 2: Time trend of suicide rates by methods, sexes, age groups and urban/rural areas (part 2).

# Dynamic pattern of suicide in Australia, 1986–2005, a descriptive-analytic study

## Author details

Xin Qi<sup>1,2</sup>, Wenbiao Hu<sup>2</sup>, Andrew Page<sup>3</sup>, Shilu Tong<sup>2</sup>

1. Xi'an Jiaotong University, China

2. Queensland University of Technology, Australia

3. University of Western Sydney, Australia

Dr. Xin Qi, School of Public Health, Xi'an Jiaotong University Health Science Center, 76 Yanta Xilu, Xi'an, Shaanxi 710061, China

Tel: +86 188 2944 7238; Email: [chester.qi@yahoo.com](mailto:chester.qi@yahoo.com)

Dr. Wenbiao Hu, School of Public Health and Social Work, Queensland University of Technology, Kelvin Grove, QLD, 4059, Australia

Tel: +61 7 3138 5724; Email: [w2.hu@qut.edu.au](mailto:w2.hu@qut.edu.au)

Prof. Andrew Page, School of Science and Health, University of Western Sydney, Building 24, Room 4.53D, Campbelltown Campus, Locked Bag, 1797, Penrith NSW 2517, Australia

Tel: +61 2 4620 3537; Fax: +61 2 4620 3792; Email: [a.page@uws.edu.au](mailto:a.page@uws.edu.au)

Prof. Shilu Tong, School of Public Health and Social Work, Queensland University of Technology, Kelvin Grove, QLD, 4059, Australia

Tel: +61 7 3138 9745; Fax: +61 7 3138 3369; Email: [s.tong@qut.edu.au](mailto:s.tong@qut.edu.au)

Author for correspondence: Dr. Xin Qi

## ABSTRACT

**Objective:** This study explores the spatiotemporal variations of suicide across Australia from 1986 to 2005, discusses the reasons for dynamic changes, and considers future suicide research and prevention strategies.

**Design:** Suicide (1986–2005) and population data were obtained from the Australian Bureau of Statistics. A series of analyses were conducted to examine the suicide pattern by sex, method and age group over time and geography.

**Results:** Differences in suicide rates across sex, age groups and suicide methods were found across geographical areas. Male suicides were mainly completed by hanging, firearms, gases and self-poisoning. Female suicides were primarily completed by hanging and self-poisoning.

**Suicide rates were higher** in rural areas than urban areas (capital cities and regional centres). Suicide rates by firearms were higher in rural areas than urban areas, while the pattern for self-poisoning showed the reverse. Suicide rates did not fluctuate substantially for the total population and those aged between 15 and 54, while suicide decreased among 55 years and over during the study period. There was a decrease of suicide by firearms during the study period especially after 1996 when new firearm control law was implemented; while suicide by hanging kept continued to increase. Areas with a high proportion of Indigenous population (e.g., northwest of Queensland and top north of Northern Territory) had showed a substantial increase in suicide incidence after 1995.

**Conclusions:** Suicide rates varied over time and space and across sexes, age groups, suicide methods. This study provides detailed patterns of suicide to inform suicide control and prevention strategies for specific sub-groups and areas of high and increased risk.

**Key words:** suicide, Australia, pattern

## STRENGTHS AND LIMITATIONS OF THE STUDY

This study presents 20-years of Australian national suicide data stratified by population group, method, time and geography, and provides valuable information for examining suicide trends in Australia.

Different levels of spatial scale (Local Government Area (LGA) and Statistical Local Area (SLA)) were combined to display the spatial distribution of suicide patterns; with boundary changes over the period adjusted using advanced GIS methods.

This study examined population-level suicide patterns using aggregated data. Detailed individual information such as marriage, employment, Indigenous status and health status prior to suicide was not available in the current dataset.

The quality of suicide data may vary over time. There is some evidence suggesting that some suicide deaths were misclassified during the latter part of the study period, and that absolute numbers of suicides were underestimated.

The suicide database was acquired a few years ago and may not indicate the trend of suicide after 2005.

## INTRODUCTION

Suicide remains a major public health issue globally, with about 1 million suicide deaths annually.<sup>1</sup> Suicide patterns, including suicide methods, time and geographical variation have been explored in many countries and regions, such as Brazil,<sup>2</sup> China,<sup>3</sup> India,<sup>4</sup> Russia,<sup>5</sup> Taiwan,<sup>6</sup> United Kingdom,<sup>7</sup> and United States.<sup>8</sup> In Australia, suicide rates have fluctuated since suicide registration started in the early of 1920s.<sup>9-11</sup> The trend of annual suicide rates from 1980 was relatively stable (around 9 to 10 per 100,000) except for a peak in 1997 (around 14.6 per 100,000).<sup>9-11</sup> However, there were still approximately 2,000 suicide deaths

1  
2 annually, mainly in male adults (25-54 years age). Thus, it is vital to understand the variations  
3  
4 of suicide patterns over time, space, population groups (age, sex and ethnic groups) and the  
5  
6 possible reasons for these variations, in order to design effective suicide control and  
7  
8 prevention programs. Previous reports and studies have explored suicide patterns in Australia  
9  
10 over time,<sup>9-12</sup> methods<sup>13</sup> and space.<sup>14</sup> From a geographical perspective, the Australian Bureau  
11  
12 of Statistics (ABS) suicide reports cover a long period (1921 to 2010) presented at state and  
13  
14 capital city level.<sup>9-11</sup> However, suicide patterns at the smaller area (e.g., Local Government  
15  
16 Area, or LGA) level, especially in rural and remote areas, were not routinely provided in ABS  
17  
18 reports. A study by Cheung et al examined the spatial pattern of suicide in Australia after  
19  
20 2000.<sup>15</sup> However, this study did not examine suicide pattern before 2000 or by suicide  
21  
22 methods; thus the dynamic spatial pattern of suicide and high risk areas of suicide by  
23  
24 particular method (e.g., firearms) could not be demonstrated. ABS reports indicated that most  
25  
26 suicide occur in urban areas in Australia, while fewer suicides were recorded in rural and  
27  
28 remote areas, areas of lower population density. It is therefore important to select suitable  
29  
30 spatial scales in examining the geographic pattern of suicide in Australia. The studies of  
31  
32 spatial patterns of suicide in earlier years (e.g. before 1995) used relative large spatial scales  
33  
34 (e.g., Statistical Division rather than LGA), which may mask the spatial variation of suicide in  
35  
36 some rural areas (e.g., in Western Australia and Northern Territory) due to their large  
37  
38 geographic size.<sup>16 17</sup> The spatial patterns of suicide by different population groups and suicide  
39  
40 methods over the long term covering both earlier years (e.g., before 2000) and more recent  
41  
42 years (after 2000) using suitable spatial scales (e.g., LGA) have not yet been examined.  
43  
44 Trends in suicide rates over time are likely to differ across population groups (e.g., young or  
45  
46 older adults) and area (e.g., suicide by firearms in urban or rural areas). Thus, this study  
47  
48 examined long-term (both dynamic and static), spatiotemporal patterns of Australian national  
49  
50 suicide, using a range of different combinations of age, time, method, and location from the  
51  
52 period 1986-2005.  
53  
54  
55  
56  
57  
58  
59  
60

## DESIGN

### Data source

Unit record data of suicide deaths between 1986 and 2005 were obtained from the Australian Bureau of Statistics (ABS), including sex, International Classification of Disease (ICD) Code (ICD 9: 950.0-959.9; ICD 10: X60-X84)<sup>18 19</sup> relating to suicide or self-inflicted injury, age, country of birth, date of suicide and Statistical Local Area (SLA) code for place of suicide occurrence. Access to unit record suicide for these variables from the ABS after 2005 was not possible, as the related procedure is under review. As SLA boundaries have changed dramatically over the study period, especially in urban areas, we chose Local Governmental Area (LGA) as the standard geographical unit to explore the spatial pattern of suicide. Choosing LGA as the spatial scale also aims to keep the balance between including sufficient case numbers of suicide in each geographical unit and using too large a geographical unit. Each LGA is composed of one or more SLAs, and LGA boundaries are relatively stable over the study period. The Australian Standard Geographical Classification (ASGC), updated annually, was used to incorporate SLA codes into LGA codes, examine and adjust for SLA/LGA boundary changes over time. CDATA 2001, a product issued by ABS, provided digital boundaries and socio-demographic data of Australia (including 1991, 1996 and 2001 population census data at SLA/LGA levels, based on 2001 Census boundary) and was applied in MapInfo 10.5 software package for map display.<sup>20</sup> Population data (SLA/LGA levels) in 1986 and 2006 Censuses from ABS were merged with 2001 Census data after adjustment for boundary changes using ASGC references. The suicide rates in different groups over time and across LGAs were then calculated. In this study, we categorized LGAs as: metropolitan areas of capital cities, regional centres (other LGA named as “city” outside of capital cities, e.g., City of Townville), or rural and remote areas (remaining LGAs).

1  
2  
3 Most areas in South Australia (SA) and Northern Territory (NT) have a very low population  
4 density and were defined as unincorporated areas by ABS at the LGA level. However, these  
5 areas were also composed of 27 SLAs according to the 2001 Census data. Thus we applied  
6 SLA data in unincorporated areas in SA and NT to provide more detailed geographic  
7 information. In the 2001 Census, Australia was divided into 628 LGAs, plus 27 SLAs in the  
8 unincorporated areas of SA and NT. Ethical approval was granted by the Human Research  
9 Ethics Committee, Queensland University of Technology.  
10  
11  
12  
13  
14  
15  
16  
17  
18

### 19 **Statistical analyses**

20  
21  
22 Descriptive and mapping approaches were applied to explore the age, sex, method, time and  
23 regional-specific patterns of suicide cases and rates. Firstly, we explored the basic pattern of  
24 suicide among different groups by calculating suicide rates, Rate Ratios and **95% Confidence**  
25 **Interval** (CI) to the annual mean national suicide rate over the study period using the annual  
26 average suicide number **in the whole Australian population** (1986-2005) as reference group.  
27  
28 Temporal trends of suicide rates in population groups were then examined, using yearly data  
29 and Poisson regression, offset by the natural logarithm of the population size and adjusting for  
30 year as a covariate. All the statistical analyses were implemented by SPSS 21.0.<sup>21</sup> Finally  
31 suicide rates at the LGA level were applied to display suicide rates by sex, age group and  
32 method using mapping approaches by MapInfo 10.5.<sup>20</sup> We used the annual average sex-  
33 specific rates for the whole of Australia over the entire study period as the reference to  
34 calculate age-adjusted standardised mortality ratios (SMRs) for both sexes.  
35  
36  
37  
38  
39  
40  
41  
42  
43  
44  
45  
46  
47  
48

### 49 **RESULTS**

50  
51  
52 This study included 45,293 suicide deaths for the 20 year period. Table 1 indicates that most  
53 suicides occurred in those aged between 15 and 54 and occurred in capital cities and regional  
54 centres, as the majority of Australian population live in urban areas. However, suicide rates in  
55  
56  
57  
58  
59  
60

1  
2 rural and remote areas were higher than in urban areas. Approximately 80% of suicides were  
3  
4 males, with the majority of suicides occurring in those aged between 15 and 54 years,  
5  
6 although older males (75-year and over) had higher suicide rates than males in other age  
7  
8 groups. Four methods accounted for the majority of suicides: (1) firearms, air guns and other  
9  
10 explosives (simplified as firearms, 16% of total suicides); (2) hanging (35% of total); (3)  
11  
12 gases and vapours (20% of total); (4) solid or liquid substances (15% of total). The Rate Ratio  
13  
14 and 95% Confident Interval (CI) of suicide in each population group and by different methods  
15  
16 were calculated, using annual average suicide incidence in the study period in Australia as a  
17  
18 reference (Table 1). We also applied Chi square test to assess the distribution of suicide cases  
19  
20 by population groups and method (all differences were statistically significant).  
21  
22  
23  
24

25  
26 Table 1 about here  
27

28  
29 Figure 1 shows time-series trends by different groups. There was a peak in the suicide rate  
30  
31 among the total population during the period 1996 to 1998, particularly in males aged from 15  
32  
33 to 34 years (A), males in rural and remote areas (B) and suicide completed by hanging (C). In  
34  
35 the early years of the study period, suicide incidence among 55 years and over was higher  
36  
37 than those below 55 years, however, rates decreased over time and were lower than those of  
38  
39 young and middle aged adults after 2000, particular in males (A). Suicide rates among 15 to  
40  
41 34 years had peaks in 1997 and 1998 (especially for males peaking at approximately 34 per  
42  
43 100,000 and at approximately 21 per 100,000 for total suicide rates) and kept relatively steady  
44  
45 in other years (25 to 28 per 100,000 for males and 14 to 17 per 100,000 for the total  
46  
47 population) (A). In 1986, firearms and other explosives were the most common methods of  
48  
49 suicide in Australia (over 6 per 100,000 among males). However, the rate dropped to around 2  
50  
51 per 100,000 in 2005. By contrast, male suicide rates by hanging rose from 3.8 per 100,000 in  
52  
53 1986 to 9.4 per 100,000 in 2005, after experiencing a peak of 10.6 per 100,000 in 1998 (C).  
54  
55 Suicide rates by hanging in males dropped after 1997 but were still higher than the early years  
56  
57  
58  
59  
60



1  
2  
3 of the study period. Figure 2 used 5-year periods to explore method-specific suicide by age  
4  
5 groups and urban rural differences. Suicide rates by firearms decreased over the study period,  
6  
7 especially among those aged 15 to 54 years and in rural and remote areas (Figure 2A and 2B);  
8  
9 while suicide by hanging increased dramatically and reached a peak during 1996 to 2000,  
10  
11 especially among aged 15-54 years (Figure 2A). For those aged 55 and older, suicide rates by  
12  
13 hanging and firearms remained more stable than for those aged 54 and younger over the study  
14  
15 period. Suicide rates by gases and vapours, solid and liquid substances fluctuated over the  
16  
17 study period among all population groups (Figure 2A and 2B). Further detailed stratification  
18  
19 of suicide incidence trends over time in each population group and suicide methods are  
20  
21 presented in Supplemental 1 and 2. Poisson regression was implemented to examine the time  
22  
23 series trend of suicide rates across population groups and by methods (Table 2). Suicide rates  
24  
25 by sex, 55 years and over, urban residence, and suicide by firearms, solid and liquid  
26  
27 substances decreased over time. However, suicide rates by hanging significantly increased.  
28  
29 **Table 3 indicated that male suicide rates by firearms kept decreasing across the whole study**  
30  
31 **period, especially from period 1991-1995 to period 1996-2000.**  
32  
33  
34  
35

36  
37 Figure 1 about here

38  
39 Figure 2 about here

40  
41  
42 Table 2 about here

43  
44  
45 Table 3 about here  
46  
47

48  
49 Figure 3 shows that among 15 to 34 years, the north and central south areas of the Northern  
50  
51 Territory (NT), the northeast and some southern parts of Western Australia (WA), the  
52  
53 northwest and central inland areas of Queensland (QLD) and some inland areas of New South  
54  
55 Wales (NSW) had higher suicide (2A). The patterns were also similar for males (NT, QLD  
56  
57 and WA in B1). Those aged between 35 and 74 had fewer high-risk areas than those aged 15  
58  
59  
60

1  
2  
3 to 34 (A2 and A3). For those aged 75 and over, suicide in northern and inland QLD and a  
4  
5 small number of LGAs in NSW and WA were higher than other areas. Around 40% of total  
6  
7 LGAs and unincorporated SLAs in NT and SA had no suicide data. Compared with males, a  
8  
9 greater number of areas had no female suicide data (2B). Rural and remote areas had lower  
10  
11 rates by self-poisoning than urban areas, except for some LGAs in inland QLD, east SA and  
12  
13 south WA (2C).  
14

15  
16  
17 Figure 3 about here  
18

19  
20 As suicide rates by firearms and by hanging had more significant changes over time than  
21  
22 other methods and by population groups, we also explored whether this trend existed in  
23  
24 spatial scales over time by stratifying the whole study period into four 5-year periods (Figure  
25  
26 4). Figure 4A shows that suicide rates by hanging was low in the early years of study period  
27  
28 (A1), and very few suicides occurred in rural and remote areas in WA, NT, QLD and NSW.  
29  
30 However, the suicide rate by hanging increased in most areas of Australia since 1986. North  
31  
32 of WA, NT and SA, north of QLD and even urban LGAs had much higher suicide rates  
33  
34 between 1996 and 2005 compared with rates in earlier years. Some areas (e.g., Mornington  
35  
36 Shire (MTS) of northwest QLD, Bathurst-Melville (BM) of NT) had dramatic increases in  
37  
38 suicide by hanging. Both of these areas experienced an increase in the number of suicide  
39  
40 cases (especially for suicide by hanging) between 1996 and 2005 (27 in MTS, 23 males and  
41  
42 26 by hanging; 23 in BM, 22 males and 20 by hanging), compared to the period between 1986  
43  
44 and 1995 (4 in MTS, male and 3 by hanging; 3 in BM, male and by hanging). Suicide rates by  
45  
46 hanging in MTS increased from 28.79 (1986-1995, annual average) to 236.32 per 100,000  
47  
48 (1996-2005, annual average); and in BM increased from 14.10 (1986-1995, annual average)  
49  
50 to 86.39 per 100,000 (1996-2005, annual average). However, the trend of suicide by firearms  
51  
52 was opposite to that of suicide by hanging (Figure 4B), especially in SA and NT, north and  
53  
54 inland areas in NSW and QLD, and middle of WA (B1 and B2). In general, unincorporated  
55  
56  
57  
58  
59  
60

1  
2  
3 NT and SA had a greater number of suicide cases after 1996 (123 from 1996 to 2005)  
4  
5 compared with the period before 1996 (22 from 1986-1995).  
6  
7

8 Figure 4 about here  
9

## 10 **DISCUSSION**

11  
12  
13  
14 This study explored suicide patterns for a range of different combinations of age, time,  
15 method, and location in Australia, using both dynamic (trends over time) and static (averages  
16 over the entire study period) approaches. Males accounted for most suicides, and the suicide  
17 rate was higher among young and middle-aged adults, in rural and remote areas, more  
18 commonly by hanging and by firearms. Suicide rate among those aged 55 years and over  
19 declined substantially over the study period, especially for males. Suicide by firearms  
20 decreased during the study period, while suicide by hanging kept increasing, especially in  
21 males and rural and remote areas. The spatial and spatiotemporal patterns of suicide were  
22 consistent with yearly mean and temporal trends of suicide among different groups.  
23  
24  
25  
26  
27  
28  
29  
30  
31  
32

33  
34  
35 Elderly and upper middle-aged adults (55-years and over) usually have more loneliness and  
36 other health issues (e.g., chronic diseases) compared with the younger age population, which  
37 may lead to psychiatric symptoms, e.g., anxiety, sense of hopelessness and despair.<sup>22 23</sup> And  
38 older adults may be less likely to seek psychiatric support when they have relevant symptoms,  
39 especially in earlier years (e.g., before the middle of 1990s).<sup>24</sup> However, suicide rates among  
40 this age group gradually decreased in the study period, especially after 2000, occurring  
41 contemporaneously with an increased use of antidepressants among older adults.<sup>25</sup>  
42 Antidepressants can reduce psychological disorders, e.g., depression, and suicidal behaviours  
43 among the elderly, especially when combined with other interventions (e.g., counselling and  
44 family support).<sup>26</sup> Selective serotonin reuptake inhibitors have less side effects (e.g.,  
45 **cardiovascular impairment** and drug interactions) than other drugs, and have been widely  
46  
47  
48  
49  
50  
51  
52  
53  
54  
55  
56  
57  
58  
59  
60

1  
2 recommended to older adults from clinics.<sup>27 28</sup> Studies in other countries have also provided  
3  
4 evidence about the protective effect of antidepressants on severe depression and suicidal  
5  
6 behaviour, although treatment of other levels of depression are still not clear.<sup>29 30</sup>  
7  
8

9  
10 Suicide rates by firearms decreased over the study period while suicide by hanging increased,  
11  
12 especially among 54 years and younger. A study in Victoria indicated that a decreased  
13  
14 registration of firearms and lower suicide rates were significantly correlated from 1997 to  
15  
16 2000.<sup>31</sup> Before 1996, the importation of firearms was controlled by the Commonwealth; and  
17  
18 the sales and possession of firearms were regulated by states and territories in Australia.<sup>32</sup>  
19  
20 Some states had lag in progressing firearm control.<sup>33</sup> The Port Arthur Massacre in Tasmania  
21  
22 led to the enactment of The National Firearms Agreement in 1996, regulating firearm sales,  
23  
24 registration, storage and bans on specific types of firearms nationally.<sup>34</sup> Our study found a  
25  
26 sharper decline in male suicide rates by firearms from the period 1991-1995 to the period  
27  
28 1996-2000 than for earlier periods (e.g., period 1991-1995 compared with period 1986-1990),  
29  
30 suggestive of a sustained impact of the firearm law enforcement after 1996.<sup>31</sup> Other studies  
31  
32 have suggested that decreased firearm suicide rates in young adults were accompanied by  
33  
34 rising suicide rates in other methods at the national and local level.<sup>35 36</sup> Our study also found  
35  
36 this trend, especially among males. Similarly, other countries experienced decreases in suicide  
37  
38 rates by firearms and increased suicide rates by hanging over time.<sup>37 38</sup> This may due to  
39  
40 substitution of methods (e.g., hanging) for firearms, especially after 1996 when availability of  
41  
42 firearms dropped in Australia.<sup>39</sup> Suicide rates by firearms in rural areas (with a higher  
43  
44 availability of firearms) remained higher than suicide rates in urban areas. More evidence,  
45  
46 including the interaction between socio-economic changes and suicide methods, still needs to  
47  
48 be assessed, especially for recent years.  
49  
50  
51  
52  
53  
54

55 Only a small percentage of both the population and suicide cases were for those aged 75 and  
56  
57 over, thus many LGAs had no suicides, or a higher suicide rate among older adults, especially  
58  
59  
60

1  
2  
3 in rural and remote areas. Areas with a higher risk of suicide also often have lower socio-  
4 economic status, along with higher proportion of Indigenous population.<sup>14</sup> Our previous study  
5 indicated that Mornington Shire in QLD and Bathurst-Melville in north of NT showed a much  
6 higher suicide risk, proportion of Indigenous population and lower socio-economic status than  
7 the national average, and both were indicated as high risk clusters using spatial cluster  
8 analysis (1999-2003).<sup>14</sup> Suicide by hanging has also increased in Indigenous communities,  
9 similar to other areas and population groups.<sup>38</sup>

10  
11  
12  
13  
14  
15  
16  
17  
18  
19 Misclassification of suicide as the cause of death may also influence results. For example,  
20 Williams et al[REF No.] reported that suicide rates in Queensland from the Queensland  
21 Suicide Register (QSR) were higher than those based on Australian Bureau of Statistics  
22 (ABS) data, with the disparity attributable to information management and definition of  
23 suicidal behaviours.<sup>47</sup> Thus the QLD suicide rate using ABS data was lower than using QSR  
24 database, especially after 2000. However, the ABS had a higher standard for evaluating the  
25 causes of deaths, e.g., complete documents from hospital or police, which confirmed the  
26 accuracy of information of current suicide database.<sup>48</sup> To ensure the consistency of the suicide  
27 data across different states the present study was restricted to ABS suicide data.

28  
29  
30  
31  
32  
33  
34  
35  
36  
37  
38  
39  
40  
41  
42  
43  
44  
45  
46  
47  
48  
49  
50  
51  
52  
53  
54  
55  
56  
57  
58  
59  
60  
Recommendations on future research and public interventions can be proposed based on the  
results of this study. Firstly, more details (e.g., health and financial status, alcohol and drugs  
use, and family conflicts history) of suicide victims need to be acquired to help public health  
policy makers and health workers to design and implement suicide control and prevention  
strategies targeting particular population groups (e.g., male young adults) and areas (e.g.,  
Indigenous communities). Suicide by firearms remains a significant method especially in rural  
and remote areas.. Gatekeeper education and training in the rural primary healthcare setting  
may also be an approach in the identification of local vulnerable populations potentially at  
risk of suicidal behaviour. Education of primary health workers and the general population

1  
2 important in reducing suicidal behaviours,<sup>51-54</sup> and effectiveness of health education programs  
3  
4 needs to be assessed locally. These activities should be explored at a local level, especially in  
5  
6 high risk areas and population groups, to assess and improve the effectiveness of suicide  
7  
8 prevention programs. Socioeconomic variables (e.g., income and unemployment)<sup>55 56</sup> and  
9  
10 environmental factors (e.g., temperature, rainfall)<sup>57-59</sup> also are associated with suicide. The  
11  
12 association of these factors on suicide by geographic markers should also be addressed by  
13  
14 time series analysis and spatial modelling analysis. This study has explored patterns of  
15  
16 suicide across population groups and by suicide methods over time and space, and have  
17  
18 shown important differences by high risk population groups, local areas and specific suicide  
19  
20 methods. Suicide is a complex issue, and cross-sectoral and multi-disciplinary approaches  
21  
22 need to also incorporate this geographic variability in key socio-demographic and behavioural  
23  
24 antecedents.  
25  
26  
27  
28  
29

### 30 **Contributorship statement**

31  
32  
33 Xin Qi designed the study, implemented all statistical analyses and drafted the manuscript.  
34  
35 Shilu Tong conceptualised the idea and revised the study protocol, especially the research  
36  
37 design and data analysis. Wenbiao Hu provided advice on statistical analyses and  
38  
39 interpretation of the results. Andrew Page helped interpreting the results and drafting the  
40  
41 manuscript. All the authors contributed to the preparation of the final manuscript and  
42  
43 approved the submission. We also thank Dr. Lyle Turner from Monash University for his  
44  
45 comments on the manuscript.  
46  
47  
48

### 49 **Competing interests**

50  
51  
52 We declare that we have no competing interests.  
53  
54

### 55 **Funding**

1  
2  
3  
4  
5  
6  
7  
8  
9  
10  
11  
12  
13  
14  
15  
16  
17  
18  
19  
20  
21  
22  
23  
24  
25  
26  
27  
28  
29  
30  
31  
32  
33  
34  
35  
36  
37  
38  
39  
40  
41  
42  
43  
44  
45  
46  
47  
48  
49  
50  
51  
52  
53  
54  
55  
56  
57  
58  
59  
60

Xin Qi was funded by the QUT Postgraduate Research Award Scholarship, and Shilu Tong was supported by a NHMRC Research Fellowship (#553043).

### **Data sharing**

No additional data available

Figure 1: suicide rates over time and sub-groups (per 100,000)

A: Sex and age groups; B: Sex and urban rural differences; C: Sex and methods;

Figure 2: suicide rates over time and methods (per 100,000, annual average)

A: Methods and age groups; B: Methods and urban rural difference

Figure 3: Suicide rates among different groups across Australia (1986-2005)

Figure 4: Suicide rates by self-harm over time and across space in Australia (1986-2005)

## Reference

- 1 World Health Organization (2012) Suicide prevention (SUPRE). Available: [http://www.who.int/mental\\_health/prevention/suicide/suicideprevent/en/index.html](http://www.who.int/mental_health/prevention/suicide/suicideprevent/en/index.html) (Assessed 08 September 2012)
- 2 Bando DH, Brunoni AR, Benseñor IM, *et al.* Suicide rates and income in São Paulo and Brazil: a temporal and spatial epidemiologic analysis from 1996 to 2008. *BMC Psychiatry* 2012;12:127.
- 3 Phillips MR, Li X, Zhang Y. Suicide rates in China, 1995-99. *Lancet* 2002;359:835-840.
- 4 Patel V, Ramasundarahettige C, Vijayakumar L, *et al.* Suicide mortality in India: a nationally representative survey. *Lancet* 2012;379:2343-2351.
- 5 Pridemore WA, Spivak AL. Patterns of suicide mortality in Russia. *Suicide Life Threat Behav* 2003;33:132-150.
- 6 Chang SS, Sterne JA, Wheeler BW, *et al.* Geography of suicide in Taiwan: spatial patterning and socioeconomic correlates. *Health Place* 2011;17:641-650.
- 7 Gunnell D, Wheeler B, Chang SS, *et al.* Changes in the geography of suicide in young men: England and Wales 1981--2005. *J Epidemiol Community Health* 2012;66:536-543.
- 8 Miller M, Azrael D, Barber C. Suicide mortality in the United States: the importance of attending to method in understanding population-level disparities in the burden of suicide. *Annu Rev Public Health* 2012;33:393-408.
- 9 ABS. 3309.0 *Suicides, Australia, 1921 to 1998*. Australian Bureau of Statistics, Canberra, Australia, 2000.
- 10 ABS. 3309.0. *Suicides, Australia, 2005*. Australian Bureau of Statistics, Canberra, Australia, 2007.
- 11 ABS. 3309.0. *Suicides, Australia, 2010*. Australian Bureau of Statistics, Canberra, Australia, 2012.
- 12 Spittal MJ, Pirkis J, Miller M, *et al.* Declines in the lethality of suicide attempts explain the decline in suicide deaths in Australia. *PLOS One* 2012;7:e44565.



- 1  
2  
3 13 Large MM, Nielssen OB. Suicide in Australia: meta-analysis of rates and methods of  
4 suicide between 1988 and 2007. *Med J Aust* 2010;192:432–437.  
5  
6  
7 14 Qi X, Hu W, Page A, Tong S. Spatial clusters of suicide in Australia. *BMC Psychiatry*,  
8 2012;12:86.  
9  
10  
11 15 Cheung YT, Spittal MJ, Pirkis J, *et al.* Spatial analysis of suicide mortality in Australia:  
12 investigation of metropolitan-rural-remote differentials of suicide risk across states/territories.  
13 *Soc Sci Med* 2012;75:1460–1468.  
14  
15  
16  
17 16 Wilkinson D, Hiller J, Moss J, *et al.* Mortality variation across Australia: descriptive data  
18 for states and territories, and statistical divisions. *Aust N Z J Public Health*, 2000;24:226-233.  
19  
20  
21 17 Burnley IH. Differential and spatial aspects of suicide mortality in New South Wales and  
22 Sydney, 1980 to 1991. *Aust J Public Health*, 1994;18:293-304.  
23  
24  
25 18 WHO. *International Classification of Diseases, 9th revision (ICD-9)*. Geneva: World  
26 Health Organization, 1975.  
27  
28  
29 19 WHO. *The ICD-10 classification of mental and behavioral disorders*. Geneva: World  
30 Health Organization, 1992.  
31  
32  
33 20 MapInfo Corporation. *MapInfo Professional 10.5 User Guide*. MapInfo Corporation, New  
34 York, United States of America, 2010.  
35  
36  
37 21 Arbuckle JL. *IBM SPSS Amos 21 User's Guide*. IBM Corporation North Castle Drive  
38 Armonk, NY 10504-1785 United States of America, 2012.  
39  
40  
41 22 Loboprabhu S, Molinari V. Severe loneliness in community-dwelling aging adults with  
42 mental illness. *J Psychiatr Pract* 2012;18:20–28.  
43  
44  
45 23 Bekhet AK, Zauszniewski JA. Mental health of elders in retirement communities: is  
46 loneliness a key factor? *Arch Psychiatr Nurs* 2012;26:214–224.  
47  
48  
49 24 Pearson JL, Conwell Y, Lindsay J, *et al.* Elderly suicide: A multi-national view. *Aging*  
50 *Ment Health* 1997;1:107–111.  
51  
52  
53 25 Hall WD, Mant A, Mitchell PB, *et al.* Association between antidepressant prescribing and  
54 suicide in Australia, 1991–2000: trend analysis. *BMJ* 2003;326:1008.  
55  
56  
57  
58  
59  
60

- 1  
2  
3 26 Hickie IB, Davenport TA, Naismith SL, *et al.* Treatment of common mental disorders in  
4 Australian general practice. *Med J Aust* 2001;175 Suppl:S25–30.  
5  
6  
7 27 Mackay FR, Dunn NR, Martin RM, *et al.* Newer antidepressants: a comparison of  
8 tolerability in general practice. *Br J Gen Pract* 1999;49:892–896.  
9  
10  
11 28 Preskorn SH. Antidepressant drug selection: criteria and options. *J Clin Psychiatry*  
12 1994;55 Suppl A:6–22.  
13  
14  
15 29 Mojtabai R. The public health impact of antidepressants: an instrumental variable analysis.  
16 *J Affect Disord* 2011;134:188–197.  
17  
18  
19 30 Friedman RA, Leon AC. Expanding the black box - depression, antidepressants, and the  
20 risk of suicide. *N Engl J Med* 2007;356:2343–2346.  
21  
22  
23 31 Ozanne-Smith J, Ashby K, Newstead S, *et al.* Firearm related deaths: the impact of  
24 regulatory reform. *Inj Prev* 2004;10:280–286.  
25  
26  
27 32 Norberry J, Woolner D, Magarey K. *After Port Arthur - Issues of Gun Control in*  
28 *Australia*. Parliamentary Library Current Issues Brief 16, 1995-96. Department of the  
29 Parliamentary Library, Canberra, Australia, 1996.  
30  
31  
32 33 AMPC. *Australasian Police Ministers' Council (APMC), Special Firearms Meeting,*  
33 *Canberra, 10 May 1996: Resolutions*. Canberra, Australia, 1996.  
34  
35  
36 34 The Library of Congress. Firearms-Control Legislation and Policy: Australia. Available at:  
37 <http://www.loc.gov/law/help/firearms-control/australia.php#Firearms> (Accessed 15 May  
38 2014).  
39  
40  
41  
42 35 Klieve H, Barnes M, De Leo D. Controlling firearms use in Australia: has the 1996 gun  
43 law reform produced the decrease in rates of suicide with this method? *Soc Psychiatry*  
44 *Psychiatr Epidemiol* 2009;44:285–292.  
45  
46  
47 36 McPhedran S, Baker J. Suicide prevention and method restriction: evaluating the impact of  
48 limiting access to lethal means among young Australians. *Arch Suicide Res* 2012;16:135–146.  
49  
50  
51 37 Cent.Dis. Control Prev. Compressed mortality file (underlying cause-of-death). Wide-  
52 Ranging Online Data for Epidemiologic Research (WONDER) database, 2010. Available:  
53 <http://wonder.cdc.gov/mortSQL.html> (Assessed 08 September 2012).  
54  
55  
56  
57  
58  
59  
60

1  
2  
3 38 Stark C, Hopkins P, Gibbs D, *et al.* Trends in suicide in Scotland 1981-1999: age, method  
4 and geography. *BMC Public Health* 2004;4:49.

5  
6  
7 39 Wilkinson D, Gunnell D. Comparison of trends in method-specific suicide rates in  
8 Australia and England & Wales, 1968-97. *Aust N Z J Public Health* 2000;24:153-157.

9  
10  
11 40 Hunter E, Reser J, Baird M, *et al.* *An analysis of suicide in Indigenous communities in*  
12 *North Queensland. The historical cultural and symbolic landscape.* Commonwealth  
13 Department of Health and Aged Care, Australia, 1999.

14  
15  
16  
17 41 Austin AE, van den Heuvel C, Byard RW. Causes of community suicides among  
18 indigenous South Australians. *J Forensic Leg Med* 2011;18:299-301.

19  
20  
21 42 Tse R, Sims N, Byard RW. Alcohol ingestion and age of death in hanging suicides. *J*  
22 *Forensic Sci* 2011;56:922-924.

23  
24  
25 43 Cantor CH, Baume P. Access to methods of suicide. What impact? *Aust N Z J Psychiatry*  
26 1998;32:8-14.

27  
28  
29 44 Beautrais A. Risk factors for suicide and attempted suicide among young people. *Aust N Z*  
30 *J Psychiatry* 2000;34:420-436.

31  
32  
33 45 De Leo D, Svetcic J, Milner A, *et al.* *Suicide in Indigenous populations of Queensland.*  
34 Australian Academic Press, Bowen Hills, Queensland, Australia, 2011.

35  
36  
37 46 Parker R, Ben-Tovim DI. A study of factors affecting suicide in Aboriginal and 'other'  
38 populations in the Top End of the Northern Territory through an audit of coronial records.  
39 *Aust N Z J Psychiatry* 2002;36:404-410.

40  
41  
42 47 Williams R, Doessel D, Svetcic J, *et al.* Accuracy of official suicide mortality data in  
43 Queensland. *Aust N Z J Psychiatry* 2010;44:815-822.

44  
45  
46 48 ABS. 3303.0. *Causes of death, Australia, 2007.* Australian Bureau of Statistics, Canberra,  
47 Australia, 2009.

48  
49  
50 49 Lester D, Leenaars A. Suicide rates in Canada before and after tightening firearm control  
51 laws. *Psychol Rep* 1993;72:787-790.

52  
53  
54 50 Ludwig J, Cook PJ. Homicide and suicide rates associated with implementation of the  
55 Brady Handgun Violence Prevention Act. *JAMA* 2000;284:585-591.

- 1  
2  
3 51. Rihmer Z, Belso N, Kalmar S. Antidepressants and suicide prevention in Hungary. *Acta*  
4 *Psychiatr Scand* 2001;103:238–239.  
5  
6  
7 52 Jorm AF, Christensen H, Griffiths KM. The impact of beyond blue: the national  
8 depression initiative on the Australian public's recognition of depression and beliefs about  
9 treatments. *Aust N Z J Psychiatry* 2005;39:248–254.  
10  
11  
12 53 Paykel ES, Hart D, Priest RG. Changes in public attitudes to depression during the Defeat  
13 Depression Campaign. *Br J Psychiatry* 1998;173:519–522.  
14  
15  
16 54 Mann JJ, Apter A, Bertolote J, *et al.* Suicide prevention strategies: a systematic review.  
17 *JAMA* 2005;294:2064–2074.  
18  
19  
20 55 Huisman M, Oldehinkel AJ. Income inequality, social capital and self-inflicted injury and  
21 violence-related mortality. *J Epidemiol Community Health* 2009;63:31–37.  
22  
23  
24 56 Chan WS, Yip PS, Wong PW, *et al.* Suicide and unemployment: what are the missing  
25 links? *Arch Suicide Res* 2007;11:327–335.  
26  
27  
28 57 Lambert G, Reid C, Kaye D, *et al.* Increased suicide rate in the middle-aged and its  
29 association with hours of sunlight. *Am J Psychiatry* 2003;160:793–795.  
30  
31  
32 58 Nicholls N, Butler CD, Hanigan I. Inter-annual rainfall variations and suicide in New  
33 South Wales, Australia, 1964–2001. *Int J Biometeorol* 2006;50:139–143.  
34  
35  
36 59 Fragar LJ, Gray EJ, Franklin RJ, *et al.* *A picture of health: a preliminary report of the*  
37 *health of country Australians*. The Australian Agricultural Health Unit, P.O. Box 256, Moree,  
38 NSW 2400, Australia, 1997.  
39  
40  
41  
42  
43  
44  
45  
46  
47  
48  
49  
50  
51  
52  
53  
54  
55  
56  
57  
58  
59  
60

Table 1: Suicide deaths and rate (per 100,000) across different groups in Australia (1986-2005)

| Population group                | Age group<br>15 to 34 |       |                        | 35 to 54 |       |                        | 55 to 74 |       |                        | 75 & over |       |                        | All ages |       |                        |
|---------------------------------|-----------------------|-------|------------------------|----------|-------|------------------------|----------|-------|------------------------|-----------|-------|------------------------|----------|-------|------------------------|
|                                 | Cases                 | Rate  | Rate Ratio<br>(95% CI) | Cases    | Rate  | Rate Ratio<br>(95% CI) | Cases    | Rate  | Rate Ratio<br>(95% CI) | Cases     | Rate  | Rate Ratio<br>(95% CI) | Cases    | Rate  | Rate Ratio<br>(95% CI) |
| <b>By sex</b>                   |                       |       |                        |          |       |                        |          |       |                        |           |       |                        |          |       |                        |
| Male                            | 15,059                | 28.29 | 2.23 (2.19, 2.27)      | 12,672   | 25.61 | 2.02 (1.98, 2.06)      | 5,986    | 22.35 | 1.77 (1.72, 1.81)      | 2,091     | 30.98 | 2.45 (2.34, 2.56)      | 35,942   | 20.32 | 1.61 (1.58, 1.63)      |
| Female                          | 3,242                 | 6.12  | 0.48 (0.47, 0.50)      | 3,556    | 7.14  | 0.56 (0.55, 0.58)      | 1,818    | 6.48  | 0.51 (0.49, 0.54)      | 682       | 6.14  | 0.49 (0.45, 0.52)      | 9,351    | 5.17  | 0.41 (0.40, 0.42)      |
| <b>By region</b>                |                       |       |                        |          |       |                        |          |       |                        |           |       |                        |          |       |                        |
| Capital cities                  | 11,267                | 16.28 | 1.29 (1.26, 1.31)      | 9,736    | 15.68 | 1.24 (1.21, 1.27)      | 4,568    | 14.21 | 1.12 (1.09, 1.16)      | 1,674     | 15.45 | 1.22 (1.16, 1.28)      | 27,332   | 12.32 | 0.97 (0.96, 0.99)      |
| Regional centres                | 3,423                 | 17.57 | 1.39 (1.34, 1.44)      | 3,269    | 17.72 | 1.40 (1.35, 1.45)      | 1,550    | 13.65 | 1.03 (1.03, 1.14)      | 584       | 15.96 | 1.26 (1.16, 1.37)      | 8,869    | 12.86 | 1.02 (1.00, 1.04)      |
| Rural & remote areas            | 3,611                 | 20.58 | 1.63 (1.57, 1.68)      | 3,223    | 17.23 | 1.36 (1.31, 1.41)      | 1,686    | 14.88 | 1.18 (1.12, 1.23)      | 515       | 15.37 | 1.21 (1.11, 1.32)      | 9,092    | 13.55 | 1.07 (1.05, 1.09)      |
| <b>By methods</b>               |                       |       |                        |          |       |                        |          |       |                        |           |       |                        |          |       |                        |
| Firearms & other explosives     | 2,795                 | 2.63  | 0.21 (0.20, 0.22)      | 2,285    | 2.30  | 0.18 (0.18, 0.19)      | 1,674    | 3.05  | 0.24 (0.23, 0.25)      | 556       | 3.11  | 0.25 (0.23, 0.27)      | 7,348    | 2.07  | 0.16 (0.16, 0.17)      |
| Gases & vapours                 | 3,457                 | 3.25  | 0.26 (0.25, 0.27)      | 4,104    | 4.13  | 0.33 (0.32, 0.34)      | 1,277    | 2.33  | 0.18 (0.17, 0.20)      | 375       | 2.10  | 0.17 (0.15, 0.18)      | 9,214    | 2.60  | 0.20 (0.20, 0.21)      |
| Hanging                         | 7,366                 | 6.93  | 0.55 (0.54, 0.56)      | 4,927    | 4.96  | 0.39 (0.38, 0.41)      | 2,301    | 4.20  | 0.33 (0.32, 0.35)      | 901       | 5.05  | 0.40 (0.37, 0.43)      | 15,620   | 4.40  | 0.35 (0.34, 0.35)      |
| Solid or liquid substances      | 2,166                 | 2.04  | 0.16 (0.16, 0.17)      | 2,863    | 2.88  | 0.23 (0.22, 0.24)      | 1,333    | 2.43  | 0.19 (0.18, 0.20)      | 434       | 2.43  | 0.19 (0.18, 0.21)      | 6,807    | 1.92  | 0.15 (0.15, 0.15)      |
| Other                           | 2,517                 | 1.26  | 0.19 (0.18, 0.20)      | 2,049    | 2.06  | 0.16 (0.16, 0.17)      | 1,219    | 2.22  | 0.18 (0.17, 0.19)      | 507       | 2.84  | 0.23 (0.21, 0.25)      | 6,294    | 1.78  | 0.14 (0.14, 0.14)      |
| <b>By region and by sex</b>     |                       |       |                        |          |       |                        |          |       |                        |           |       |                        |          |       |                        |
| <b>Male</b>                     |                       |       |                        |          |       |                        |          |       |                        |           |       |                        |          |       |                        |
| Capital cities                  | 9,072                 | 26.66 | 2.08 (2.03, 2.13)      | 7,439    | 24.59 | 1.92 (1.87, 1.97)      | 3,358    | 21.86 | 1.71 (1.65, 1.77)      | 1,179     | 30.02 | 2.35 (2.22, 2.49)      | 21,107   | 19.63 | 1.53 (1.51, 1.56)      |
| Regional centres                | 2,868                 | 29.90 | 2.33 (2.25, 2.42)      | 2,593    | 28.60 | 2.23 (2.15, 2.32)      | 1,213    | 22.21 | 1.74 (1.64, 1.84)      | 468       | 32.80 | 2.57 (2.35, 2.81)      | 7,173    | 21.39 | 1.67 (1.63, 1.71)      |
| Rural/remote areas              | 3,119                 | 32.46 | 2.72 (2.62, 2.82)      | 2,640    | 25.99 | 2.16 (2.08, 2.24)      | 1,415    | 23.73 | 1.94 (1.84, 2.04)      | 444       | 31.82 | 2.60 (2.37, 2.85)      | 7,662    | 21.39 | 1.77 (1.73, 1.82)      |
| <b>Female</b>                   |                       |       |                        |          |       |                        |          |       |                        |           |       |                        |          |       |                        |
| Capital cities                  | 2,195                 | 6.40  | 0.50 (0.48, 0.52)      | 2,297    | 7.39  | 0.58 (0.55, 0.60)      | 1,210    | 7.33  | 0.57 (0.54, 0.61)      | 495       | 7.26  | 0.57 (0.52, 0.62)      | 6,225    | 5.58  | 0.44 (0.42, 0.45)      |
| Regional centres                | 555                   | 5.75  | 0.45 (0.42, 0.49)      | 676      | 7.37  | 0.58 (0.53, 0.62)      | 337      | 5.83  | 0.46 (0.41, 0.51)      | 116       | 5.27  | 0.41 (0.34, 0.50)      | 1,696    | 4.91  | 0.38 (0.37, 0.40)      |
| Rural/remote areas              | 492                   | 5.43  | 0.43 (0.39, 0.47)      | 583      | 6.12  | 0.51 (0.47, 0.55)      | 271      | 4.71  | 0.39 (0.34, 0.43)      | 71        | 3.41  | 0.28 (0.22, 0.35)      | 1,430    | 4.13  | 0.34 (0.33, 0.36)      |
| <b>By methods and by region</b> |                       |       |                        |          |       |                        |          |       |                        |           |       |                        |          |       |                        |
| <b>Capital cities</b>           |                       |       |                        |          |       |                        |          |       |                        |           |       |                        |          |       |                        |
| Firearms & other explosives     | 1,148                 | 1.66  | 0.13 (0.12, 0.14)      | 913      | 1.47  | 0.12 (0.11, 0.12)      | 626      | 1.95  | 0.15 (0.14, 0.17)      | 211       | 1.95  | 0.16 (0.14, 0.18)      | 2,908    | 1.31  | 0.10 (0.10, 0.11)      |
| Gases & vapours                 | 2,299                 | 3.32  | 0.26 (0.25, 0.27)      | 2,420    | 3.90  | 0.31 (0.30, 0.32)      | 732      | 2.28  | 0.18 (0.17, 0.19)      | 222       | 2.05  | 0.16 (0.14, 0.19)      | 5,674    | 2.56  | 0.20 (0.20, 0.21)      |
| Hanging                         | 4,339                 | 6.27  | 0.50 (0.48, 0.51)      | 3,017    | 4.86  | 0.38 (0.37, 0.40)      | 1,470    | 4.57  | 0.36 (0.34, 0.38)      | 591       | 5.45  | 0.43 (0.40, 0.47)      | 9,478    | 4.27  | 0.30 (0.30, 0.31)      |
| Solid or liquid substances      | 1,547                 | 2.24  | 0.18 (0.17, 0.19)      | 1,864    | 3.00  | 0.24 (0.23, 0.25)      | 901      | 2.80  | 0.22 (0.21, 0.24)      | 284       | 2.62  | 0.21 (0.19, 0.23)      | 4,600    | 2.07  | 0.16 (0.16, 0.17)      |
| Other                           | 1,934                 | 2.79  | 0.22 (0.21, 0.23)      | 1,522    | 2.45  | 0.19 (0.18, 0.20)      | 839      | 2.61  | 0.21 (0.19, 0.22)      | 366       | 3.38  | 0.27 (0.24, 0.30)      | 4,672    | 2.11  | 0.17 (0.16, 0.17)      |
| <b>Regional centres</b>         |                       |       |                        |          |       |                        |          |       |                        |           |       |                        |          |       |                        |
| Firearms & other explosives     | 603                   | 3.09  | 0.25 (0.23, 0.27)      | 495      | 2.68  | 0.21 (0.20, 0.23)      | 368      | 3.24  | 0.26 (0.23, 0.28)      | 131       | 3.58  | 0.28 (0.24, 0.33)      | 1,606    | 2.33  | 0.19 (0.18, 0.19)      |
| Gases & vapours                 | 631                   | 3.24  | 0.26 (0.24, 0.28)      | 861      | 4.67  | 0.37 (0.35, 0.40)      | 275      | 2.42  | 0.19 (0.17, 0.22)      | 91        | 2.49  | 0.20 (0.16, 0.24)      | 1,858    | 2.70  | 0.21 (0.20, 0.22)      |
| Hanging                         | 1,502                 | 7.71  | 0.61 (0.58, 0.64)      | 1,026    | 5.56  | 0.44 (0.41, 0.47)      | 456      | 4.02  | 0.32 (0.29, 0.35)      | 187       | 5.11  | 0.40 (0.35, 0.46)      | 3,200    | 4.65  | 0.37 (0.36, 0.38)      |
| Solid or liquid substances      | 344                   | 1.77  | 0.14 (0.13, 0.16)      | 570      | 3.09  | 0.25 (0.23, 0.27)      | 258      | 2.27  | 0.18 (0.16, 0.20)      | 92        | 2.51  | 0.20 (0.16, 0.24)      | 1,268    | 1.84  | 0.15 (0.14, 0.15)      |
| Other                           | 343                   | 1.76  | 0.14 (0.13, 0.16)      | 317      | 1.72  | 0.14 (0.12, 0.15)      | 193      | 1.70  | 0.14 (0.12, 0.16)      | 83        | 2.27  | 0.18 (0.15, 0.22)      | 937      | 1.36  | 0.11 (0.10, 0.12)      |

1  
2  
3  
4  
5  
6  
7  
8  
9  
10  
11  
12  
13  
14  
15  
16  
17  
18  
19  
20  
21  
22  
23  
24  
25  
26  
27  
28  
29  
30  
31  
32  
33  
34  
35  
36  
37  
38  
39  
40  
41  
42  
43  
44  
45  
46  
47  
48  
49

Table 1: Suicide deaths and rate (per 100,000) across different groups in Australia (1986-2005, continued)

| Population group             | Age group     |              |                          | 35 to 54      |              |                          | 55 to 74     |              |                          | 75 & over    |              |                          | All ages      |              |                     |
|------------------------------|---------------|--------------|--------------------------|---------------|--------------|--------------------------|--------------|--------------|--------------------------|--------------|--------------|--------------------------|---------------|--------------|---------------------|
|                              | Cases         | Rate         | Rate Ratio (95% CI)      | Cases         | Rate         | Rate Ratio (95% CI)      | Cases        | Rate         | Rate Ratio (95% CI)      | Cases        | Rate         | Rate Ratio (95% CI)      | Cases         | Rate         | Rate Ratio (95% CI) |
| Rural/remote areas           |               |              |                          |               |              |                          |              |              |                          |              |              |                          |               |              |                     |
| Firearms & other explosives  | 1,044         | 5.95         | 0.47 (0.44, 0.50)        | 877           | 4.69         | 0.37 (0.35, 0.40)        | 680          | 6.00         | 0.48 (0.44, 0.51)        | 214          | 6.39         | 0.51 (0.44, 0.52)        | 2,834         | 4.22         | 0.33 (0.32, 0.35)   |
| Gases & vapours              | 527           | 3.00         | 0.24 (0.22, 0.26)        | 823           | 4.40         | 0.35 (0.33, 0.37)        | 270          | 2.38         | 0.19 (0.17, 0.21)        | 62           | 1.85         | 0.15 (0.11, 0.19)        | 1,682         | 2.51         | 0.20 (0.19, 0.21)   |
| Hanging                      | 1,525         | 8.69         | 0.69 (0.65, 0.72)        | 884           | 4.73         | 0.37 (0.35, 0.40)        | 375          | 3.31         | 0.26 (0.24, 0.29)        | 123          | 3.67         | 0.29 (0.24, 0.35)        | 2,942         | 4.38         | 0.35 (0.33, 0.36)   |
| Solid or liquid substances   | 275           | 1.57         | 0.12 (0.11, 0.14)        | 429           | 2.29         | 0.18 (0.17, 0.20)        | 174          | 1.54         | 0.12 (0.11, 0.14)        | 58           | 1.73         | 0.14 (0.11, 0.18)        | 939           | 1.40         | 0.11 (0.10, 0.12)   |
| Other                        | 240           | 1.37         | 0.11 (0.10, 0.12)        | 210           | 1.12         | 0.09 (0.08, 0.10)        | 187          | 1.65         | 0.13 (0.11, 0.15)        | 58           | 1.73         | 0.14 (0.11, 0.18)        | 695           | 1.04         | 0.08 (0.08, 0.09)   |
| <b>By methods and by sex</b> |               |              |                          |               |              |                          |              |              |                          |              |              |                          |               |              |                     |
| Male                         |               |              |                          |               |              |                          |              |              |                          |              |              |                          |               |              |                     |
| Firearms & other explosives  | 2,555         | 4.80         | 0.38 (0.37, 0.40)        | 2,123         | 4.29         | 0.34 (0.33, 0.36)        | 1,605        | 5.99         | 0.48 (0.45, 0.50)        | 551          | 8.16         | 0.65 (0.60, 0.70)        | 6,869         | 3.88         | 0.31 (0.30, 0.32)   |
| Gases & vapours              | 2,961         | 5.56         | 0.44 (0.42, 0.46)        | 3,428         | 6.93         | 0.55 (0.53, 0.57)        | 1,091        | 4.07         | 0.32 (0.30, 0.34)        | 324          | 4.80         | 0.38 (0.34, 0.43)        | 7,805         | 4.41         | 0.35 (0.34, 0.36)   |
| Hanging                      | 6,267         | 11.77        | 0.93 (0.91, 0.96)        | 4,115         | 8.32         | 0.66 (0.64, 0.68)        | 1,821        | 6.80         | 0.54 (0.51, 0.56)        | 670          | 9.93         | 0.79 (0.73, 0.85)        | 12,963        | 7.33         | 0.58 (0.57, 0.59)   |
| Solid or liquid substances   | 1,301         | 2.44         | 0.19 (0.18, 0.20)        | 1,573         | 3.18         | 0.25 (0.24, 0.27)        | 671          | 2.51         | 0.20 (0.18, 0.21)        | 198          | 2.93         | 0.23 (0.20, 0.27)        | 3,746         | 2.12         | 0.17 (0.16, 0.17)   |
| Other                        | 1,975         | 3.72         | 0.29 (0.28, 0.31)        | 1,433         | 2.89         | 0.23 (0.22, 0.24)        | 798          | 2.98         | 0.24 (0.22, 0.25)        | 348          | 5.16         | 0.41 (0.37, 0.46)        | 4,559         | 2.58         | 0.20 (0.20, 0.21)   |
| Female                       |               |              |                          |               |              |                          |              |              |                          |              |              |                          |               |              |                     |
| Firearms & other explosives  | 240           | 0.45         | 0.04 (0.03, 0.04)        | 162           | 0.33         | 0.03 (0.02, 0.03)        | 69           | 0.25         | 0.02 (0.02, 0.03)        | 5            | 0.05         | 0.00 (0.00, 0.01)        | 479           | 0.26         | 0.02 (0.02, 0.02)   |
| Gases & vapours              | 496           | 0.94         | 0.07 (0.07, 0.08)        | 676           | 1.36         | 0.11 (0.10, 0.12)        | 186          | 0.66         | 0.05 (0.05, 0.06)        | 51           | 0.46         | 0.04 (0.03, 0.05)        | 1,409         | 0.78         | 0.06 (0.06, 0.07)   |
| Hanging                      | 1,099         | 2.07         | 0.16 (0.15, 0.17)        | 812           | 1.63         | 0.12 (0.11, 0.13)        | 480          | 1.71         | 0.14 (0.12, 0.15)        | 231          | 2.08         | 0.17 (0.15, 0.19)        | 2,657         | 1.47         | 0.12 (0.11, 0.12)   |
| Solid or liquid substances   | 865           | 1.63         | 0.13 (0.12, 0.14)        | 1,290         | 2.59         | 0.21 (0.19, 0.22)        | 662          | 2.36         | 0.19 (0.17, 0.20)        | 236          | 2.13         | 0.17 (0.15, 0.19)        | 3,061         | 1.69         | 0.13 (0.13, 0.14)   |
| Other                        | 542           | 1.03         | 0.08 (0.07, 0.09)        | 616           | 1.23         | 0.10 (0.09, 0.11)        | 421          | 1.50         | 0.12 (0.11, 0.13)        | 163          | 1.42         | 0.12 (0.10, 0.14)        | 1,745         | 0.97         | 0.08 (0.07, 0.08)   |
| <b>Total suicide</b>         | <b>18,301</b> | <b>17.23</b> | <b>1.36 (1.34, 1.38)</b> | <b>16,228</b> | <b>16.35</b> | <b>1.29 (1.27, 1.32)</b> | <b>7,804</b> | <b>14.23</b> | <b>1.12 (1.10, 1.15)</b> | <b>2,773</b> | <b>15.54</b> | <b>1.23 (1.18, 1.28)</b> | <b>45,293</b> | <b>12.66</b> |                     |

Note: population size (all and by groups) was based on the mean value of Australian population census (1986, 1991, 1996, 2001, 2006). Reference group: annual average of total suicide in Australia between 1986 and 2005 after adjusting for population changes over years.

Table 2: Suicide rate change over time (population groups and suicide methods)

|                            | RR   | 95% CI     | P-value |
|----------------------------|------|------------|---------|
| All suicide                | 0.99 | 0.99, 0.99 | <0.001  |
| Male                       | 0.99 | 0.99, 0.99 | <0.001  |
| Female                     | 0.99 | 0.99, 0.99 | <0.001  |
| Age 15-34                  | 0.99 | 0.99, 1.00 | <0.001  |
| Age 35-54                  | 1.00 | 0.99, 1.00 | 0.009   |
| Age 55-74                  | 0.97 | 0.97, 0.98 | <0.001  |
| Age 75 & over              | 0.97 | 0.97, 0.98 | <0.001  |
| Urban areas                | 0.99 | 0.99, 0.99 | 0.001   |
| Regional areas             | 1.00 | 0.99, 1.00 | 0.019   |
| Rural & remote areas       | 1.00 | 0.99, 1.00 | 0.022   |
| Firearm                    | 0.93 | 0.93, 0.94 | <0.001  |
| Hanging                    | 1.04 | 1.03, 1.04 | <0.001  |
| Gas and vapour             | 0.99 | 0.98, 0.99 | <0.001  |
| Solid or liquid substances | 0.97 | 0.96, 0.97 | <0.001  |
| Other methods              | 0.98 | 0.98, 0.98 | <0.001  |

RR: Relative Risk. Reference group: suicide in 1986 for each population group.

Table 3: Male suicide rate by firearms change over time (Reference: mean annual male suicide rate in 1986-1990 by each of age groups and types of regions)

| Population group       | Time period | RR   | 95% CI     | P-value |
|------------------------|-------------|------|------------|---------|
| 15-34 yrs              | 2001-2005   | 0.22 | 0.08, 0.36 | <0.001  |
|                        | 1996-2000   | 0.39 | 0.28, 0.51 | <0.001  |
|                        | 1991-1995   | 0.78 | 0.69, 0.87 | <0.001  |
| 35-54 yrs              | 2001-2005   | 0.39 | 0.26, 0.51 | <0.001  |
|                        | 1996-2000   | 0.52 | 0.40, 0.64 | <0.001  |
|                        | 1991-1995   | 0.83 | 0.72, 0.94 | 0.001   |
| 55-74 yrs              | 2001-2005   | 0.43 | 0.28, 0.57 | <0.001  |
|                        | 1996-2000   | 0.63 | 0.49, 0.76 | <0.001  |
|                        | 1991-1995   | 0.88 | 0.75, 1.01 | 0.049   |
| 75 yrs & over          | 2001-2005   | 0.45 | 0.21, 0.69 | <0.001  |
|                        | 1996-2000   | 0.66 | 0.43, 0.89 | <0.001  |
|                        | 1991-1995   | 0.83 | 0.59, 1.06 | 0.103   |
| Capital cities         | 2001-2005   | 0.33 | 0.21, 0.45 | <0.001  |
|                        | 1996-2000   | 0.46 | 0.35, 0.57 | <0.001  |
|                        | 1991-1995   | 0.78 | 0.69, 0.88 | <0.001  |
| Regional centres       | 2001-2005   | 0.32 | 0.17, 0.48 | <0.001  |
|                        | 1996-2000   | 0.47 | 0.33, 0.61 | <0.001  |
|                        | 1991-1995   | 0.78 | 0.65, 0.90 | <0.001  |
| Rural and remote areas | 2001-2005   | 0.41 | 0.29, 0.53 | <0.001  |
|                        | 1996-2000   | 0.61 | 0.50, 0.72 | <0.001  |
|                        | 1991-1995   | 0.91 | 0.81, 1.00 | 0.048   |



1  
2  
3 Supplemental 1: Time trend of suicide rates by methods, sexes, age groups and urban/rural  
4 areas (part 1).  
5  
6

7 Supplemental 2: Time trend of suicide rates by methods, sexes, age groups and urban/rural  
8 areas (part 2).  
9  
10  
11  
12  
13  
14  
15  
16  
17  
18  
19  
20  
21  
22  
23  
24  
25  
26  
27  
28  
29  
30  
31  
32  
33  
34  
35  
36  
37  
38  
39  
40  
41  
42  
43  
44  
45  
46  
47  
48  
49  
50  
51  
52  
53  
54  
55  
56  
57  
58  
59  
60

For peer review only

1  
2  
3  
4  
5  
6  
7  
8  
9  
10  
11  
12  
13  
14  
15  
16  
17  
18  
19  
20  
21  
22  
23  
24  
25  
26  
27  
28  
29  
30  
31  
32  
33  
34  
35  
36  
37  
38  
39  
40  
41  
42  
43  
44  
45  
46  
47  
48  
49  
50  
51  
52  
53  
54  
55  
56  
57  
58  
59  
60

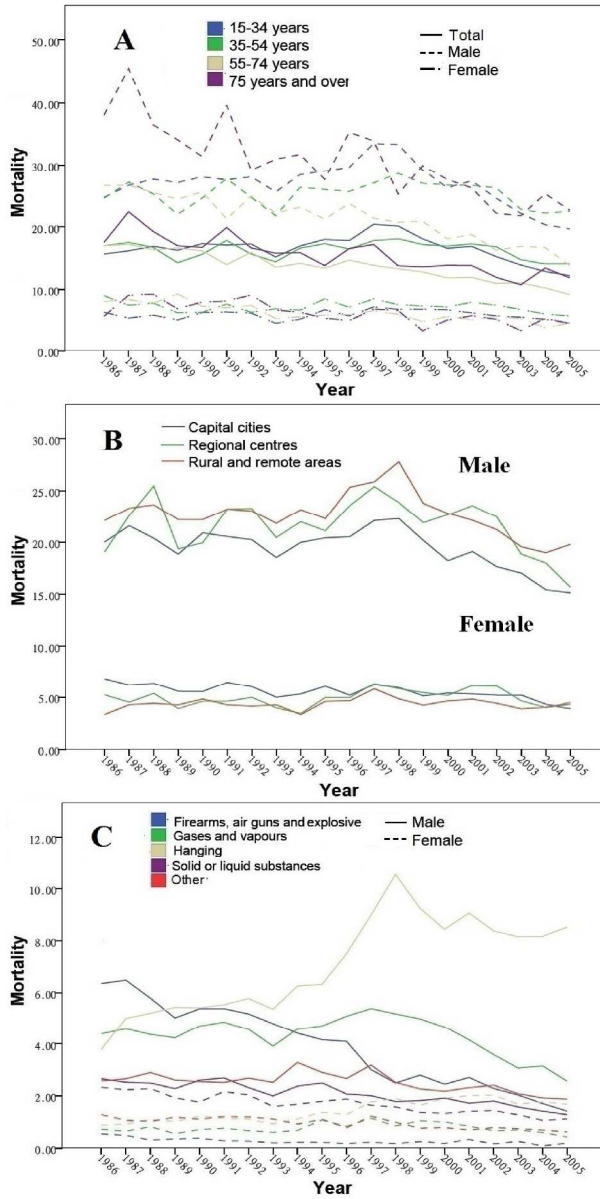

132x258mm (300 x 300 DPI)

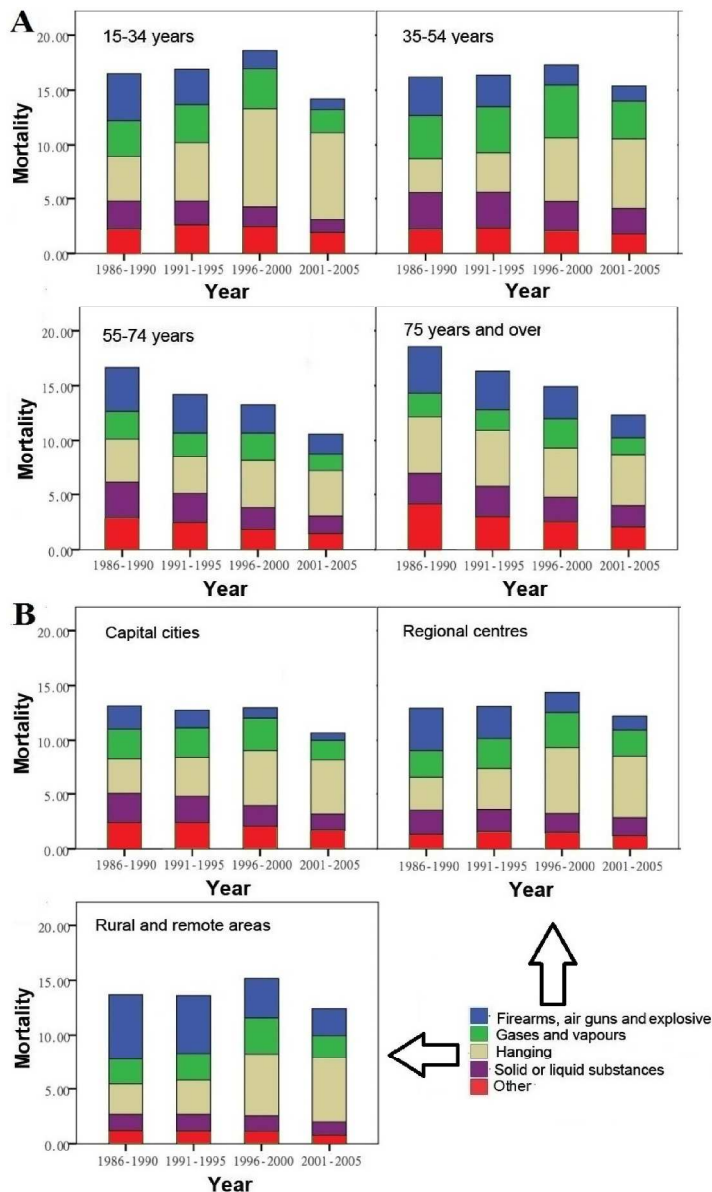

151x255mm (300 x 300 DPI)

1  
2  
3  
4  
5  
6  
7  
8  
9  
10  
11  
12  
13  
14  
15  
16  
17  
18  
19  
20  
21  
22  
23  
24  
25  
26  
27  
28  
29  
30  
31  
32  
33  
34  
35  
36  
37  
38  
39  
40  
41  
42  
43  
44  
45  
46  
47  
48  
49  
50  
51  
52  
53  
54  
55  
56  
57  
58  
59  
60

1  
2  
3  
4  
5  
6  
7  
8  
9  
10  
11  
12  
13  
14  
15  
16  
17  
18  
19  
20  
21  
22  
23  
24  
25  
26  
27  
28  
29  
30  
31  
32  
33  
34  
35  
36  
37  
38  
39  
40  
41  
42  
43  
44  
45  
46  
47  
48  
49  
50  
51  
52  
53  
54  
55  
56  
57  
58  
59  
60



381x635mm (300 x 300 DPI)

1  
2  
3  
4  
5  
6  
7  
8  
9  
10  
11  
12  
13  
14  
15  
16  
17  
18  
19  
20  
21  
22  
23  
24  
25  
26  
27  
28  
29  
30  
31  
32  
33  
34  
35  
36  
37  
38  
39  
40  
41  
42  
43  
44  
45  
46  
47  
48  
49  
50  
51  
52  
53  
54  
55  
56  
57  
58  
59  
60

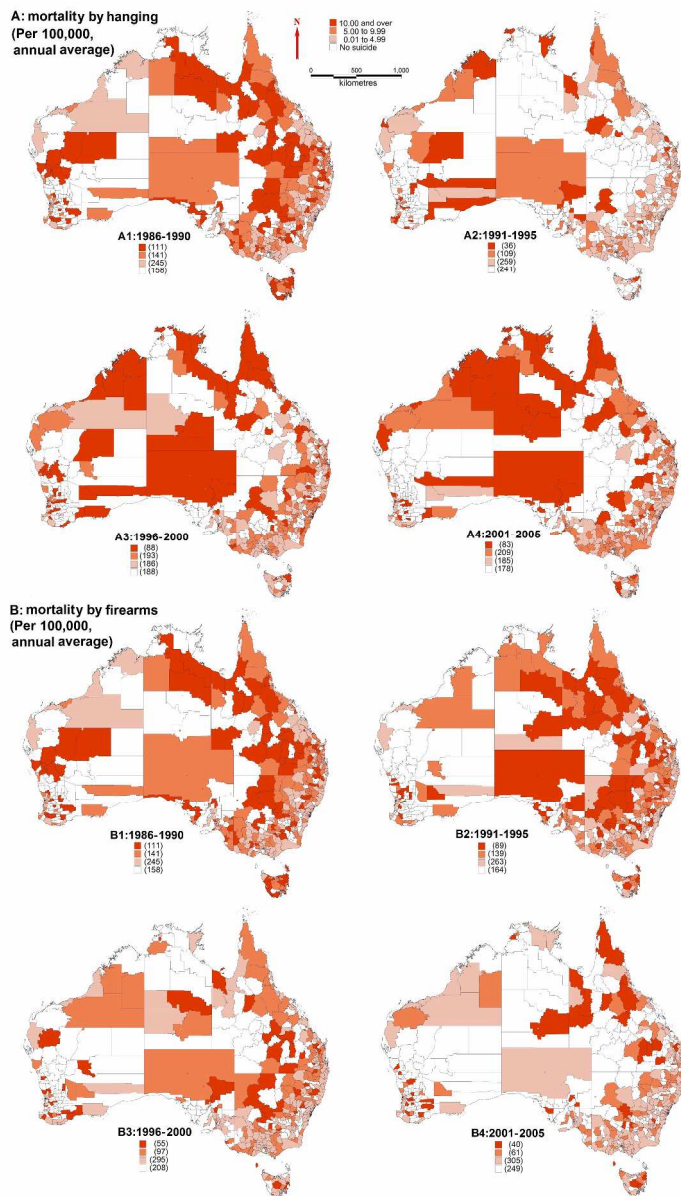

395x635mm (300 x 300 DPI)

1  
2  
3  
4  
5  
6  
7  
8  
9  
10  
11  
12  
13  
14  
15  
16  
17  
18  
19  
20  
21  
22  
23  
24  
25  
26  
27  
28  
29  
30  
31  
32  
33  
34  
35  
36  
37  
38  
39  
40  
41  
42  
43  
44  
45  
46  
47  
48  
49  
50  
51  
52  
53  
54  
55  
56  
57  
58  
59  
60

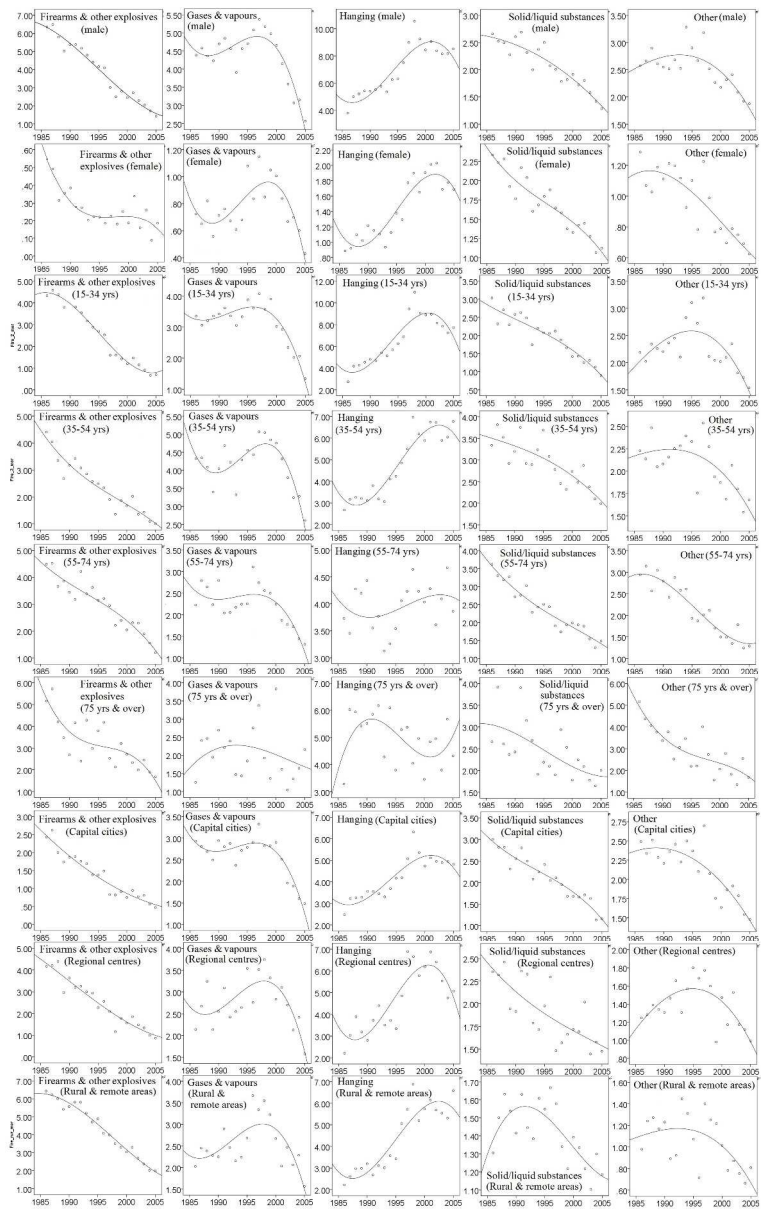

694x1103mm (96 x 96 DPI)

1  
2  
3  
4  
5  
6  
7  
8  
9  
10  
11  
12  
13  
14  
15  
16  
17  
18  
19  
20  
21  
22  
23  
24  
25  
26  
27  
28  
29  
30  
31  
32  
33  
34  
35  
36  
37  
38  
39  
40  
41  
42  
43  
44  
45  
46  
47  
48  
49  
50  
51  
52  
53  
54  
55  
56  
57  
58  
59  
60



552x851mm (96 x 96 DPI)
