# Supplementary material for: Dynamic pattern of suicide in Australia, 1986–2005: a descriptive-analytic study
Source: HighWire-hosted journal article supplement (doi:10.1136/bmjopen-2014-005311), 2014-07-01

Supplemental 1: Time trend of suicide rates by methods, sexes, age groups and urban/rural areas (part 1).

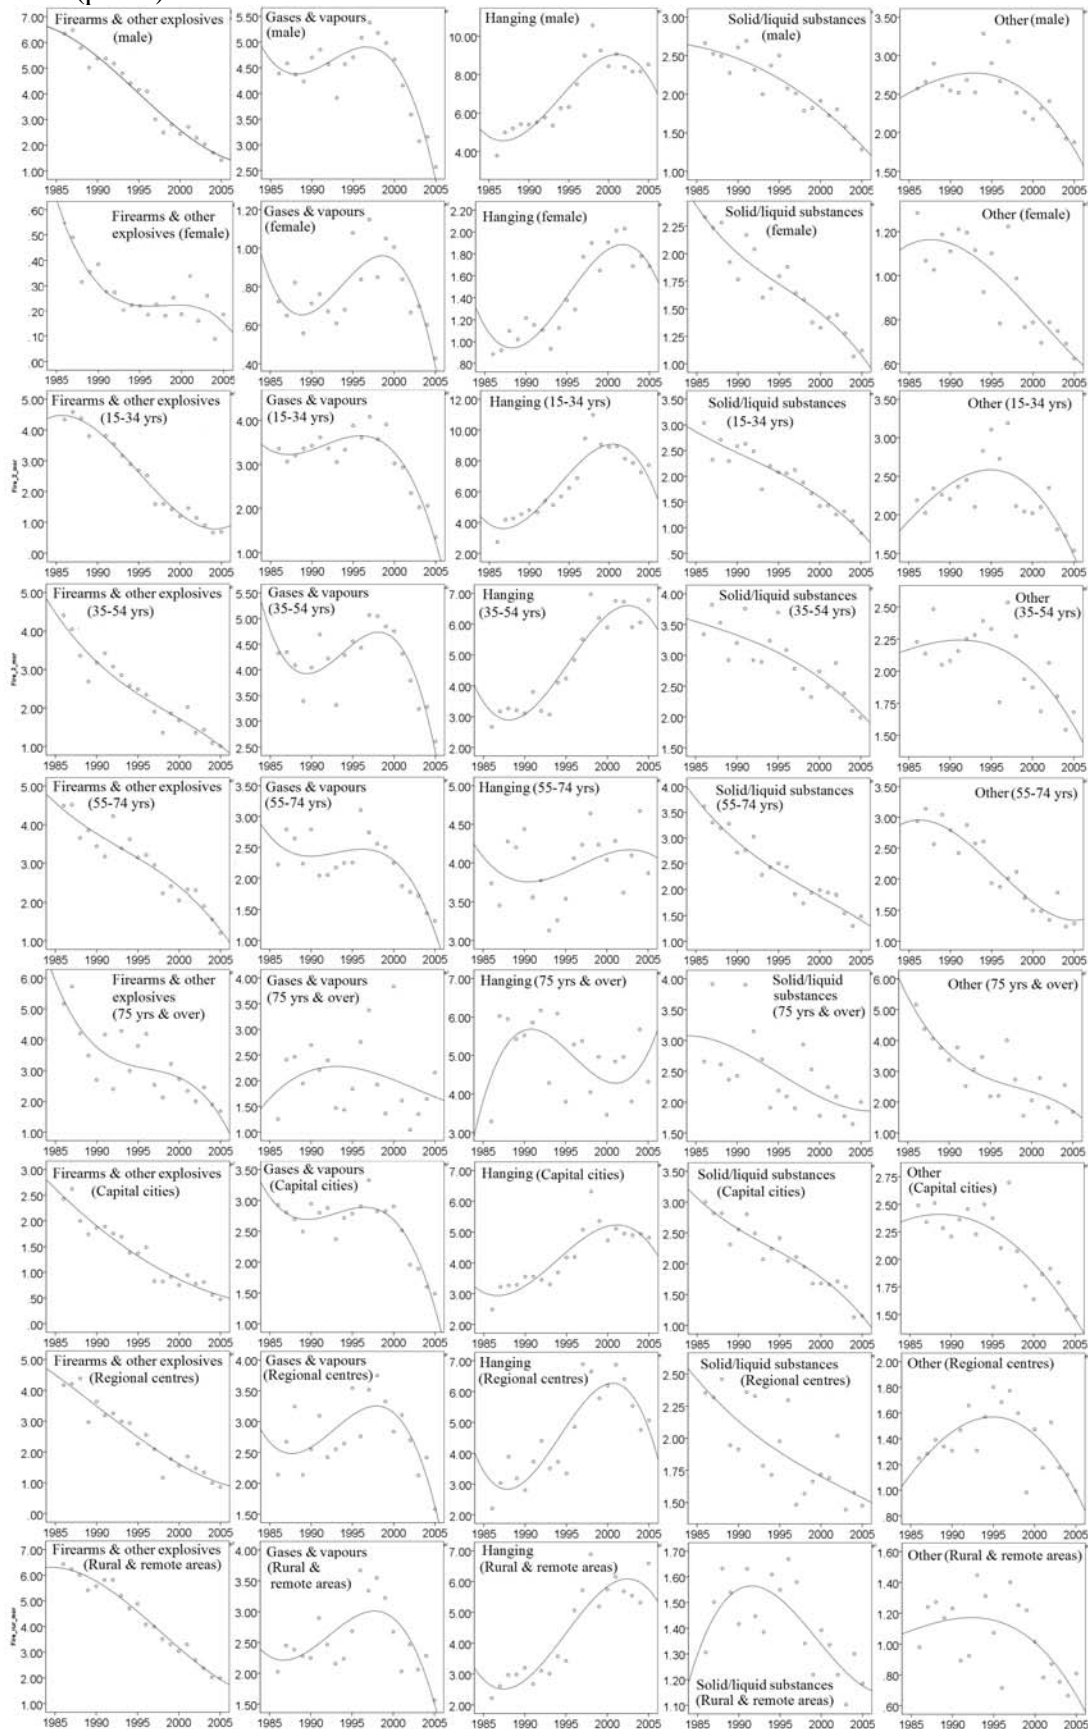

Supplemental 2: Time trend of suicide rates by methods, sexes, age groups and urban/rural areas (part 2)

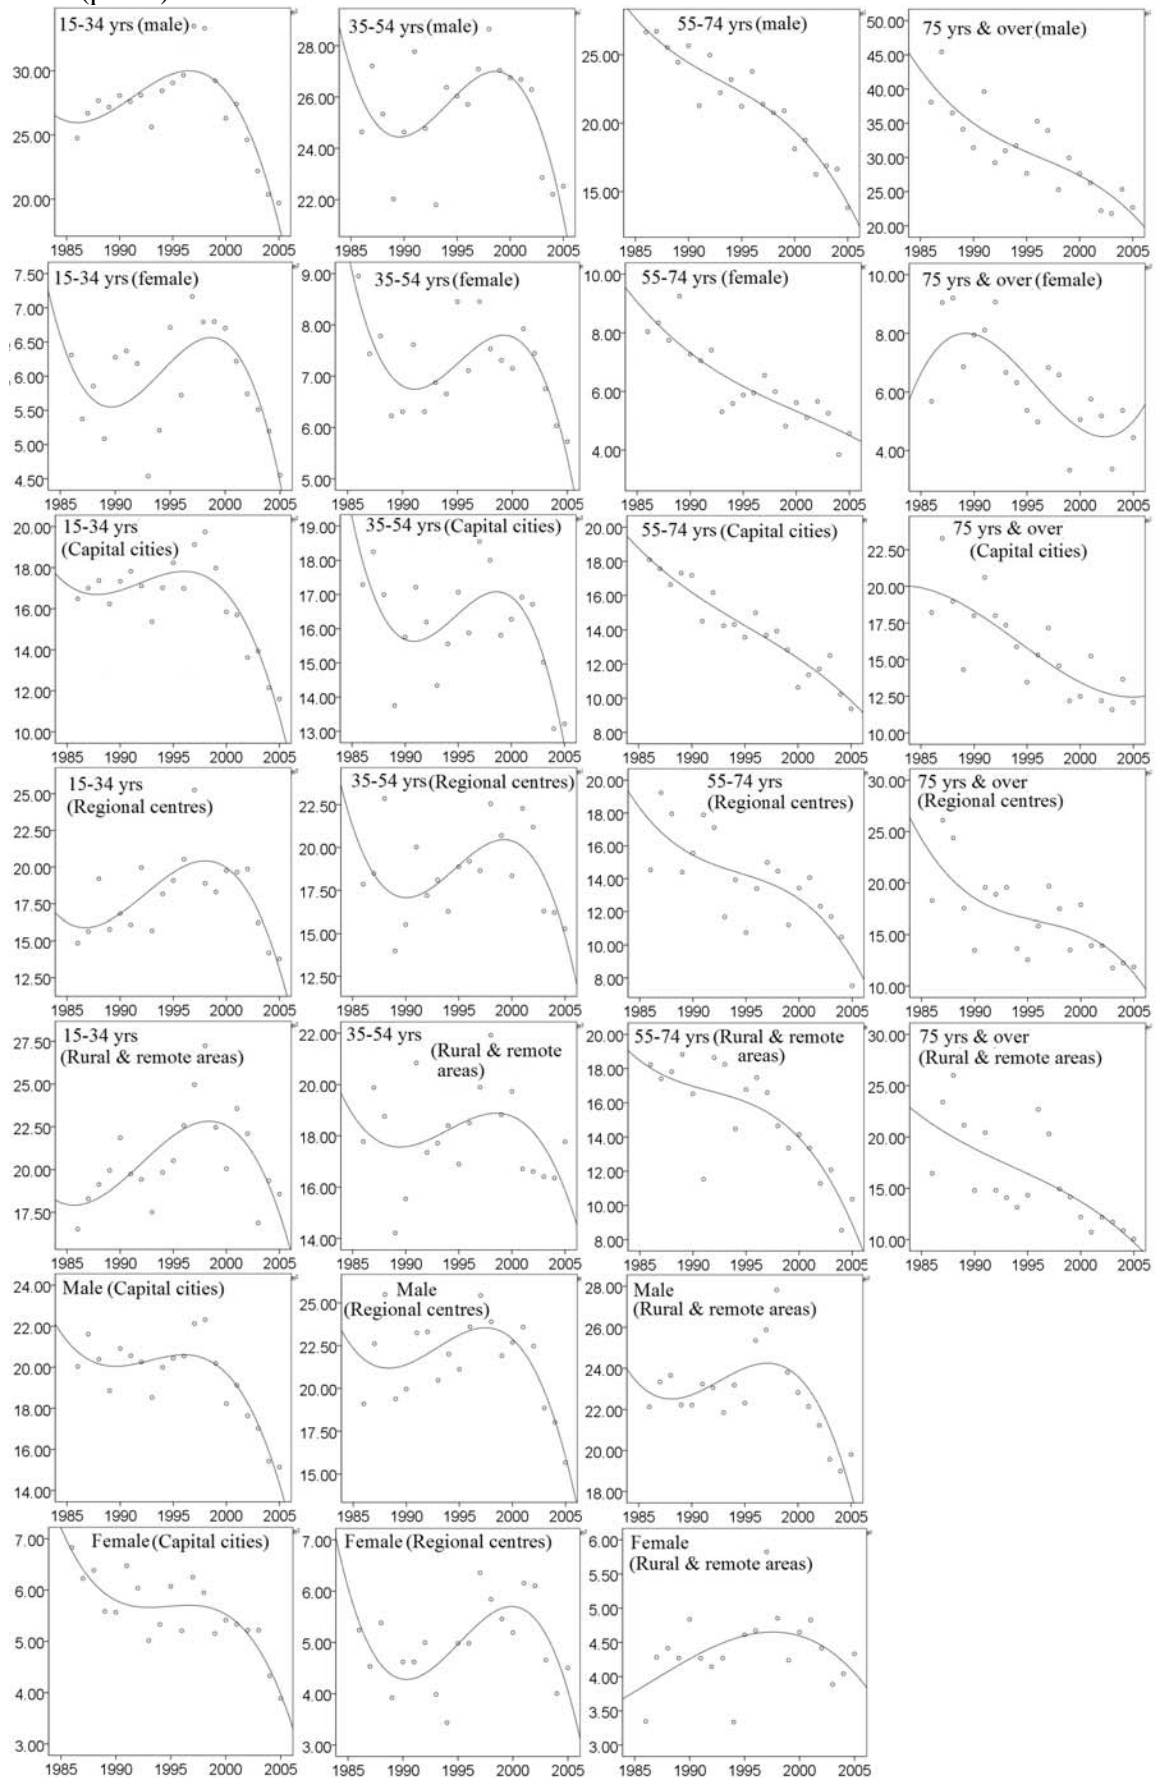

Supplement: bmjopen-2014-005311supp_figures.pdf [file bmjopen-2014-005311supp_figures.pdf]
